# Supplementary material for: One-year trial of 12-hour shifts in a non-intensive care unit and an intensive care unit in a public hospital: a qualitative study of 24 nurses’ experiences
Source: PubMed Central journal article supplement — BMJ Open. 2019 Jul 9;9(7):e024292. doi: 10.1136/bmjopen-2018-024292 (PMC6629459; doi:10.1136/bmjopen-2018-024292), 2019-07-09
Supplement: bmjopen-2018-024292.draft_revisions.pdf [file bmjopen-2018-024292.draft_revisions.pdf]

# BMJ Open

BMJ Open is committed to open peer review. As part of this commitment we make the peer review history of every article we publish publicly available.

When an article is published we post the peer reviewers' comments and the authors' responses online. We also post the versions of the paper that were used during peer review. These are the versions that the peer review comments apply to.

The versions of the paper that follow are the versions that were submitted during the peer review process. They are not the versions of record or the final published versions. They should not be cited or distributed as the published version of this manuscript.

BMJ Open is an open access journal and the full, final, typeset and author-corrected version of record of the manuscript is available on our site with no access controls, subscription charges or pay-per-view fees (<http://bmjopen.bmj.com>).

If you have any questions on BMJ Open's open peer review process please email [info.bmjopen@bmj.com](mailto:info.bmjopen@bmj.com)

# BMJ Open

## One-year trial of 12-hour shifts in a non-intensive care unit and an intensive care unit in a public hospital: A qualitative study of 24 nurses' experiences

|                               |                                                                                                                          |
|-------------------------------|--------------------------------------------------------------------------------------------------------------------------|
| Journal:                      | <i>BMJ Open</i>                                                                                                          |
| Manuscript ID                 | bmjopen-2018-024292                                                                                                      |
| Article Type:                 | Research                                                                                                                 |
| Date Submitted by the Author: | 21-May-2018                                                                                                              |
| Complete List of Authors:     | Ose, Solveig Osborg; SINTEF, Tjonnas, Maria; SINTEF, Health Kaspersen, Silje Lill; SINTEF, Health Færevik, Hilde; SINTEF |
| Keywords:                     | hospital, nurse, nursing workforce, 12-hours shifts, shift work, long shift tolerance                                    |
|                               |                                                                                                                          |

SCHOLARONE™  
Manuscripts

Peer Review Only

1  
2  
3 **One-year trial of 12-hour shifts in a non-intensive care unit and**  
4  
5  
6 **an intensive care unit in a public hospital: A qualitative study of**  
7  
8 **24 nurses' experiences**  
9

10  
11 Short title: One-year trial of 12-hour shifts in a non-intensive care hospital unit and an  
12  
13 intensive care unit  
14  
15

16  
17  
18 **Corresponding author:**

19  
20 Solveig Osborg Ose

21  
22 E-mail: Solveig.ose@sintef.no

23  
24 Address: SINTEF Technology and Society, Dep. of Health,

25  
26 Postboks 4760 Torgarden, 7465 TRONDHEIM

27  
28 Phone: (+47) 907 28 684  
29  
30  
31  
32

33 *Maria Suong Tjønnås*

34 SINTEF Technology & Society, Dep. of Health, Trondheim, Norway

35  
36  
37 *Silje L. Kaspersen*

38 SINTEF Technology & Society, Dep. of Health, Trondheim, Norway

39  
40  
41 *Hilde Færevik*

42 SINTEF Technology & Society, Dep. of Health, Trondheim, Norway  
43  
44  
45  
46  
47  
48  
49  
50  
51  
52  
53  
54  
55  
56  
57  
58  
59  
60

## Abstract

*Background:* An 8-hour shift is the standard shift length for hospital nurses in Norway, although 12-hour shifts are becoming increasingly common in the health services.

*Objectives:* The aim of this study was to provide recommendations to hospital owners and employee unions about developing efficient, sustainable, and safe work-hour agreements. Employees at two clinics of a 700-bed university hospital, one a non-intensive care and the other a newborn intensive care unit, trialled 12-hour shifts on weekends for one year.

*Methods:* We systematically recorded the experiences of 24 nurses working 12-hour shifts, 16 in the medical unit and eight in the intensive care unit. All were interviewed before, during, and at the end of the trial period. The interview material was recorded, transcribed to text, and coded systematically.

*Results:* The trial participants were pleased with working 12-hour shifts on weekends; the advantage was that they worked every fourth instead of every third weekend. Every second work weekend, they worked day shifts, and every alternate work weekend, they worked night shifts. This meant that they worked 8 and 4 more hours than usual, respectively, each weekend. The expectations and experiences differed considerably between participants. Some wanted to continue working 12-hour shifts on weekends after the 1-year trial, but others did not. Although most participants handled the 12-hour shifts effectively, their individual experiences differed in terms of health consequences, effects on their family, appreciation of the extra weekend off, perceived effects on patients, and perceived work task flexibility.

Working 12-hour shifts was voluntary, and many nurses did not want to work 12-hour shifts because this was not compatible with having small children or health problems.

*Conclusions:* Experiences differed considerably between participants, especially those in the intensive care unit. The work pace and work load in both units mean that not all employees prefer, or have the health, strength and tolerance, to work 12-hour shifts. If the goal is to

1  
2  
3 recruit and retain nurses, nurses should be free to choose to work 12-hour shifts. No one  
4  
5 should be forced to work more than 8 hours because of the risk to employee and patient  
6  
7 health, and the risk of dissatisfaction with work. The positive experiences of some nurses  
8  
9 indicate that those who wish to work 12-hour shifts should be allowed.  
10

11  
12  
13 *Keywords:*

14  
15 Hospital, nurse, nursing workforce, 12-hours shifts, shift work, long shift tolerance  
16  
17

18  
19  
20 Article summary

21  
22 Strengths and limitations of this study:

- 23  
24
- 25 • A key strength of this study is its longitudinal design.
  - 26 • The nurses trialled 12-hour shifts for 1 year, and their perspectives were obtained  
27 over an 18-month period that captured the nurses' views before, during, and after  
28 the intervention.
  - 29 • Another strength is the richness and authenticity of individual experiences that can  
30 be revealed by a qualitative methodology based on a relatively unstructured  
31 interview format.
  - 32 • The study shows the heterogeneity of nurses' preferences for and ability to  
33 tolerate 12-hour shifts.
  - 34 • A requirement for study approval was that the 12-hour shifts would be voluntary.
- 35  
36  
37  
38  
39  
40  
41  
42  
43  
44  
45  
46 It is possible this study underestimates the risk of adverse outcomes from 12-hour  
47 shifts, as nurses who knew they would be susceptible to such outcomes likely  
48 chose not to participate.  
49  
50  
51  
52  
53  
54  
55  
56  
57  
58  
59  
60

## 1. Introduction

Hospitals are round-the-clock service providers, requiring staff that contribute to the efficient use of capital investments on days, nights, and weekends. However, there is evidence of adverse physiological and psychological effects from shift work, including disruption to the biological rhythm, sleep disorders, health problems, diminished performance at work, job dissatisfaction, and social isolation (Admi et al., 2008). The needs of hospital owners/managers and hospital employees are not always compatible, which can give rise to conflicts, work strikes, and unions demanding a stronger voice in staffing decisions and working time arrangements.

One of the suggested solutions has been to introduce 12-hour shifts, which are becoming increasingly common for hospital nurses (Dall'Ora et al., 2015). Hospital management may prefer 12-hour shifts instead of 8-hour shifts because longer shifts require fewer handovers and less overlap between shifts. Employees may prefer longer shifts to compress their work into fewer days. However, research has identified a wide range of associations between 12-hour shift work and negative outcomes for hospital nurses.

### *1.2. Stress, fatigue, health concerns, and sleep*

One study found that nurses working 12-hour shifts reported less social and domestic disruption, experienced more chronic fatigue, cognitive anxiety, sleep disturbances, and emotional exhaustion than those working 8-hour shifts (Iskera-golec et al., 1996). A study of 130 full-time nurses working 12-hour dayshifts in three hospitals showed that nurses experienced moderate to high levels of acute fatigue and moderate levels of chronic fatigue and poor inter-shift recovery. In that study, lack of regular exercise and older age were associated with greater acute fatigue (Chen et al., 2014). One study based on a cross-sectional survey of 31 627 registered nurses in 2 170 general medical/surgical units within 488

1  
2  
3 hospitals across 12 European countries concluded that longer working hours are associated  
4 with adverse outcomes for hospital nurses, and that some of these adverse outcomes, such as  
5 high burnout rates, may pose safety risks for both patients and nurses (Dall'Ora et al., 2015).  
6  
7 Another study found that registered nurses working 12-hour shifts were younger, less  
8 experienced, and more stressed than colleagues working 8-hour shifts (Hoffman and Scott,  
9 2003).

10  
11 A study of 80 registered nurses found that nurses accrue considerable sleep debt while  
12 working successive 12-hour shifts, and that this is accompanied by fatigue and sleepiness. It  
13 also found that some nurses appear to be more severely affected by sleep loss than others, as  
14 measured by attention lapses (Geiger-Brown et al., 2012).

15  
16 The authors of a recent systematic literature review suggest that 12-hour shifts may cause  
17 health problems and job dissatisfaction, but that this must be confirmed by more empirical  
18 evidence (Banakhar, 2017).

### 19 20 21 22 23 24 25 26 27 28 29 30 31 32 *1.1. Job satisfaction*

33  
34  
35 An early study showed that job satisfaction decreased markedly when 12-hour shifts were  
36 introduced in 10 hospital wards; reasons included adverse effects on domestic and social  
37 arrangements (Todd et al., 1993). A similar study of 880 nurses from 12 hospitals compared  
38 those working 8-hour shifts with those working 12-hour shifts and found that a substantial  
39 percentage of both groups (47% and 44%, respectively) had low satisfaction with their  
40 schedules and desired to change them (Kundi et al., 1995). Another study showed that nurses  
41 working 12-hour shifts were more satisfied with their jobs, experienced less emotional  
42 exhaustion, and were 10 times more likely to be satisfied with their schedules, twice as likely  
43 to perceive 12-hour schedules as important, and 58% less likely to report missing shifts; it  
44  
45  
46  
47  
48  
49  
50  
51  
52  
53  
54  
55  
56  
57  
58  
59  
60

1  
2  
3 also found that units with 12-hour shifts had lower vacancy rates (Stone et al., 2006). This  
4  
5 study found no differences in patient outcomes.  
6  
7

### 8 *1.3. Patient safety*

9

10  
11 Many studies have examined the relationship between shift duration and patient safety.  
12  
13 One study analysed 14-day logbook data from 502 nurses and concluded that longer shift  
14  
15 duration increased the risk of errors and near errors, and decreased nurses' vigilance (Scott et  
16  
17 al., 2006). Another study of 80 nurses working 12-hour shifts suggested the need for a  
18  
19 comprehensive approach to fatigue management, including organisational support to provide  
20  
21 healthy work schedules, favourable work environments, fewer psychological and physical  
22  
23 demands, and assistance to improve nurses' sleep quality and quantity (Han et al., 2014). In a  
24  
25 recent study of 22 nurses working 12-hour shifts, the nurses wore a wrist activity monitor,  
26  
27 kept a diary to track their sleep/wake cycles for 2 weeks, and completed fatigue tests at the  
28  
29 beginning, middle, and end of four duty shifts. Compared with day-shift workers, night-shift  
30  
31 workers exhibited more performance variability and subjective sleepiness (Wilson et al.,  
32  
33 2017).  
34  
35

36  
37 One study of medical records of patients in 60 non-psychiatric wards in six Finnish  
38  
39 hospitals, combined with survey data from employees, concluded that long work hours, high  
40  
41 work stress, and poor collaboration among ward staff are associated with hospital-associated  
42  
43 infection among patients (Virtanen et al., 2009).  
44

45  
46 A systematic literature review concluded that there is strong evidence of a positive  
47  
48 relationship between long working hours and adverse outcomes in nurses, but that more  
49  
50 evidence is needed to determine the relationship to adverse patient outcomes (Bae and Fabry,  
51  
52 2014).  
53  
54  
55  
56  
57



#### 1.4. Employee safety

A systematic review of the safety implications of long work hours concluded that shifts longer than 8 hours are associated with a cumulative increase in the risk of accidents; for example, the risk of accidents after 12 hours is twice that after 8 hours of work (Wagstaff and Lie, 2011).

#### 1.4. This study

The topic of shift length is complex, and the results are not consistent across studies. Studies comparing shift length are typically based on cross-sectional data, and the conclusions are based on associations. A systematic literature review of the effects of shift length in healthcare settings found that few studies were of moderate or high methodological quality, and that the results were difficult to compare because there is no standard measure of outcomes such as the quality of patient care (Estabrooks et al., 2009). Other limitations are the lack of studies comparing the same type of nursing units (e.g., critical care, general medicine, surgical units), patients (e.g., adult, paediatric, geriatric), as well as failure to control for variables such as the burden of work, unit complexity, and shift complexity (Estabrooks et al., 2009). Consistent with this, another study found that the effects of shift duration depend on the context (e.g., work tasks, workforce, and workplace), and that innovative approaches are needed to understand the influence of all relevant contextual factors (Ferguson and Dawson, 2012).

The mixed results of studies of the effects of 12-hour versus 8-hour shifts in hospitals make it difficult for both employers and employees to make evidence-based decisions. In this study, we aimed to perform a thorough qualitative study, to understand nurses' experiences and perceptions of working 12-hour shifts compared with the usual 8-hour shifts. To our

1  
2  
3 knowledge, no qualitative study has followed nurses working 12-hour shifts over a longer  
4  
5 period. A qualitative longitudinal study may contribute to a better understanding of the mixed  
6  
7 associations found in previous cross-sectional quantitative studies and may provide results  
8  
9 with clearer policy implications.  
10

11 The aim of this study was to understand the nurses' individual experiences.  
12  
13  
14  
15  
16  
17  
18  
19  
20  
21  
22  
23  
24  
25  
26  
27  
28  
29  
30  
31  
32  
33  
34  
35  
36  
37  
38  
39  
40  
41  
42  
43  
44  
45  
46  
47  
48  
49  
50  
51  
52  
53  
54  
55  
56  
57  
58  
59  
60

For peer review only

## 2. Methods

### 2.1. Macro setting

In the Norwegian democratic welfare state, public authorities are responsible for providing and financing health services. The responsibility for specialist care lies with the state (administered by four regional health authorities). The four regions have a total of 39 public hospitals and about 10 small private hospitals funded through contracts with the regional health authorities. The proportion of health professionals in the labour force is high in Norway compared with other high- and middle-income countries (Gupta et al., 2003), and the quality of health services is high (OECD, 2014). The Conservative Party, in power since 2013, argued that long shifts in the health sector may be positive for both patients and employees. In 2015, changes to the Norwegian legislation on working hours in the health sector enabled employers and employees to implement long shifts without the approval of the National Labour Inspection Authority. Employers were now allowed to make deals with local unions permitting daily work of up to 12.5 hours. Working hours is an important area of conflicts between the nurses' union (NSF) and hospital employer organisation (SPEKTER) in recent years.

The labour market in Norway is characterised by labour unions and collective agreements. The labour market is regulated by the Norwegian Working Environment Act and through agreements between labour unions and employer associations. Collective agreements set rules for conditions such as salaries, working hours, pensions, and insurance. Union membership is generally high; about 75% of all certified nurses in Norway were members of the Norwegian Nurses Organisation in 2015 (Bergene and Egeland, 2016).

## 2.2. *Micro setting*

The hospital included in the study was a large university hospital in Norway. Two units were included: one gastrointestinal surgery bed post (non-ICU), and a highly specialised newborn intensive care unit (ICU). The difference in the type of care was reflected in the staff experience and education levels: the non-ICU had many young nurses who had not completed any specialised training, and it had relatively high turnover; the ICU had more-experienced staff, most of whom had a specialisation. There were no male nurses at either unit. The non-ICU had ~60 nurses; the ICU, ~120 nurses. Most nurses at both units worked a rotating three-shift schedule (day, evening, night), but some worked exclusively days or evenings, and others only overnight shifts. Patients stayed from 1 day to several months in both units.

## 2.3. *Study design*

The trial was planned and conducted by the hospital while the qualitative study following the trial was performed by external researchers and funded by the Norwegian Research Council and the social partners.

The qualitative study following the trial was planned together with managers and employees in the two units. The employees did not want to work 12-hour shifts on weekdays, because of concerns about patient treatment and employee preferences. The managers initially agreed to trial 12-hour shifts on weekends for 6 months, but this was extended to one year in both units. Only nurses were included in the study, not doctors or other personnel. Thirty nurses in the non-ICU and 12 in the ICU volunteered to try the 12-hour shifts, of whom 16 and eight, respectively, chose to participate in the qualitative study. They all agreed to be interviewed once before the trial started, during the trial, and after the trial ended. Most of the

1  
2  
3 individual interviews were conducted during a shift, but some interviews were difficult to  
4  
5 organise within work hours and were conducted during the nurse's leisure time.  
6  
7

#### 8 *2.4. Preparation*

9

10  
11 Before the two units started the trial, the managers and employees agreed on a shift  
12  
13 system with certain number of rest breaks during the 12-hours shifts and that only two 12-  
14  
15 hour shifts should be worked per weekend (Friday included a regular 8-hour shift) and that  
16  
17 the nurses would have the day before and the day after the work weekend off. Participation  
18  
19 was voluntary, and employees were formally informed about what participation implied in a  
20  
21 meeting with the researchers. Nurses with a history of high sickness absence were excluded  
22  
23 from the trial, as the managers were concerned that 12-hour shifts would be too demanding  
24  
25 for them and pose a risk to the trial. A pre-trial meeting was also held in which the managers,  
26  
27 union representatives, and researchers discussed the trial and study with representatives from  
28  
29 the National Labour Inspection Authority.  
30  
31

32  
33 The ICU started their trial period on 5 September 2015; the non-ICU, on 1 April 2016.  
34  
35

#### 36 *2.5. Data collection*

37  
38

39  
40 Three semi-structured interview guides were developed by the research team to cover the  
41  
42 situations before, during, and after the trial. The pre-trial interviews lasted 1 to 1.5 hours, the  
43  
44 in-trial interviews lasted ~1 hour, and the post-trial interviews lasted 30–40 minutes. All  
45  
46 participants provided written consent at the pre-trial interview. Seventy interviews were  
47  
48 conducted by three researchers, as two participants were lost to follow up due to job change.  
49  
50 The interviews were conducted in the Norwegian language.  
51

52  
53 The 18-month data collection period was August 2015 to January 2017.  
54  
55  
56  
57  
58  
59  
60

## 2.6. Emergent themes

Projects that involve many interviews produce a vast amount of data or text that is difficult to structure and analyse systematically. A 10-step method has been developed to code and structure all text using Microsoft Word and Excel (Ose, 2016). Systematic manual coding ensures that all the content is coded, not just words or terms extracted from the text. In this study, 140 codes were used. Examples of codes are “work environment”, “organisation of rotation plans”, “experiences during the 12-hour shifts”, and “family consequences of 12-hour shifts”. The multidisciplinary team that conducted the interviews coded all interviews. We developed the code list together at the beginning of the coding process, coded the same interviews, and revised the code list several times during the process. All transcribed interviews were fully coded (i.e., all transcribed text was assigned a code). In this study, we analysed data under the main heading of “12-hour shifts”. The remaining data provide information about the hospital and unit context. This information is not used explicitly in this study. Using the 10-step method, we identified the following main topics for the analysis: “pre-trial expectations of working 12-hour shifts on weekends”, “organising and implementing the 12-hour shift schedule”, “consequences of working 12-hour shifts” (with subheadings “positive/negative effects during the shift”, “positive/negative effects during the off-shift periods”, “sleep”, “quality of treatment”, “health problems”, etc.), “decision after the end of the trial period”, and “individual overall assessment”. The results section is organised under these headings.

## 2.7. Patient and Public Involvement statement.

This health services research study includes employed public hospital nurses. Both the employer organisation and the nurses' union were involved from the beginning of the project to the end.

## 2.8. Ethics

This study was approved by the Regional Committees for Medical and Health Research Ethics in Mid-Norway (REC) (reference number 2014/2017).

## 3. Results

### 3.1. Expectations before starting the 12-hour shifts

All participants expressed their excitement about starting 12-hour shifts. Participants were asked, “What do you expect will happen when you start working 12-hour shifts on the weekends?” without any explicit cues. We have organised the answers into topics according to the how the responses were coded.

#### 3.1.1. Not much difference from the current situation

Some of the nurses in both units thought it was difficult to have any expectations because the work load was generally unpredictable. Some periods were very busy, with many severely ill patients, whereas other periods were less busy. The nurses in the non-ICU thought that the long shifts might occur during peak periods, and some expressed concerns about this.

*It can be very busy here, so it [working 12-hour shifts] will be difficult because you do not have time to be tired during a busy day shift. At night, when you are tired because it's night time, a busy shift will be very tough (Nurse 14, non-ICU, pre-trial interview).*

Many of the nurses in the ICU were used to working double shifts, and they did not expect the 12-hour shifts to be more difficult.

### 3.1.2. More tired

Most of the respondents expected to be more tired after a weekend working 12-hour shifts compared with a weekend working 8-hour shifts (i.e., 8 hours more than usual for a day-shift weekend):

*I think I'll be very tired from working that weekend. It is good that we'll have the Monday after off, so we can get our strength back before starting the next shift (Nurse 13, non-ICU, pre-trial interview).*

When we asked whether they were tired after a regular 8-hour shift, they typically answered:

*It varies a lot depending on my work tasks and the amount of pressure at the unit. But I'm tired at the end of a regular 8-hour shift if it's a busy day (Nurse 2, ICU, pre-trial interview).*

The participants in both units confirmed that they were exhausted after a busy shift. However, most recovered well before the next shift, although problems obtaining sufficient sleep between an evening and morning shift were common.

### 3.1.3. Nights

Some participants worked only nights. They typically expected that the 12-hour shifts would not be significantly different:

*The night shift is rather long already—it's 10 hours now. When I start doing 12-hour shifts, I will start at 7.45 pm instead of 9.30 pm. The difference is not that big, and I'll get to have a 1-hour break during the shift. I think it will be beneficial to start earlier in the evening (Nurse 10, non-ICU, pre-trial interview).*



1  
2  
3 Those working both day and night shifts during their 12-hour shift weekends shared this  
4  
5 view about the nights.

#### 6 7 **3.1.4. Health concerns**

8  
9 Some respondents were not concerned about potential adverse health effects from  
10  
11 working 12-hour shifts, not because they thought such shifts would be healthy, but rather  
12  
13 because it was already difficult to work a rotating three-shift schedule. However, others did  
14  
15 express concerns:

16  
17  
18 *I'm cursed with neck pain when I'm stressed. I'm wondering whether my*  
19  
20 *back and neck will handle it [to work 12-hour shifts]. But as long as I get*  
21  
22 *to take rest breaks during the shifts, I think I'll be fine (Nurse 10, non-ICU,*  
23  
24 *pre-trial interview).*

#### 25 26 27 **3.1.5. Attitude and mental preparation**

28  
29 Several of the respondents argued that the experience would largely depend on their  
30  
31 attitudes: *"If you say to yourself that this is not going to work out well, it will not work out*  
32  
33 *well"*. Participants in both units felt this way, but this is also related to personality:

34  
35  
36  
37 *I don't really have any specific concerns; I usually take things as they*  
38  
39 *come. I'm thinking that this weekend will be about work and nothing else;*  
40  
41 *it doesn't matter that there are some more hours (Nurse 16, non-ICU, pre-*  
42  
43 *trial interview).*

44  
45  
46 However, some ICU nurses were not convinced that the introduction of 12-hour shifts  
47  
48 would be that easy. They reflected on the need to prepare mentally for the long shift:

49  
50  
51 *I want to try working 12-hour shifts, but I am not sure because I haven't*  
52  
53 *tried this before. Maybe I won't like it. But I think I'll have to be mentally*  
54  
55

1  
2  
3 *prepared because on days when I usually finish at 3 pm, I will now have to*  
4  
5 *work until 7.30 pm. (Nurse 1, ICU, pre-trial interview).*  
6  
7

### 8 **3.1.6. Patient consequences**

9  
10 The nurses in the ICU seemed to be more concerned than the nurses in the non-ICU about  
11 potential adverse consequences for patients of nurses working longer shifts:  
12  
13

14  
15 *I'm not sceptical...but I think we must find out whether 12-hour shifts will*  
16 *increase the probability of making mistakes. Will we be totally exhausted? -*  
17 *+\*At the end of the shift, will we be unable to do anything? Will we be able*  
18 *to do the work tasks we are supposed to do? (Nurse 1, ICU, pre-trial*  
19 *interview)*  
20  
21  
22  
23  
24  
25

26 The staff in the newborn ICU had strong focus on quality; for example, two colleagues  
27 would always double-check medicine prescriptions (double-signing). They wondered  
28 whether they might be too tired at the end of the 12-hour shifts to sustain quality:  
29  
30  
31

32  
33  
34 *If you have a family making many demands or a newborn who needs*  
35 *constant monitoring, it will be demanding to work 12 hours with the same*  
36 *patient and family. At the end of the shift, there might be a small risk of*  
37 *making mistakes; for instance, we might overlook that the infant's*  
38 *condition has worsened... (Nurse 6, ICU, pre-trial interview).*  
39  
40  
41  
42  
43  
44

### 45 **3.1.7. Effect on leisure and family life**

46  
47 Several of the respondents expressed concern about how the 12-hour shifts would affect  
48 their family life.  
49  
50  
51  
52  
53  
54  
55  
56  
57

1  
2  
3 *Well, I'll have to see how this works out with the rest of my life. It's not just*  
4 *that I'll be at work for more hours, it's that this must also fit my life outside*  
5 *work (Nurse 1, ICU, pre-trial interview).*  
6  
7  
8  
9

10 However, the criteria for selecting participants imply that most of the respondents had a  
11 family situation that allowed them to try the 12-hour shifts on weekends.  
12  
13

### 14 3.1.8. Enthusiasm and resistance

15 Some had great expectations about introducing the 12-hour shifts:  
16

17  
18  
19 *My expectations are first and foremost that 12-hour shifts will be*  
20 *introduced as a permanent arrangement and that this will lead to an*  
21 *improved quality of nursing both for the newborn patients and parents*  
22 *(Nurse 5, ICU, pre-trial interview).*  
23  
24  
25  
26  
27

28 Others were indifferent. When we asked about the atmosphere at the units in relation to the  
29 12-hour shift trial, a typical answer was:  
30  
31

32  
33  
34 *Well, some of the nurses are happy to try 12-hour shifts, but others do not*  
35 *want to. But I do not think there has been any strong protest against the*  
36 *trial (Nurse 10, non-ICU, pre-trial interview).*  
37  
38  
39  
40

41 Those unwilling to try 12-hour shifts typically had small children. Their colleagues who  
42 chose to participate in the trial showed understanding:  
43  
44

45  
46 *It's easy to understand if they [nurses who do not want to try 12-hour*  
47 *shifts] have kids. Working a regular 8-hour shift allows you to see your*  
48 *kids before and after work, but this is different when working 12-hour*  
49 *shifts: they are in bed when you come home and still asleep when you leave*  
50 *for your next shift (Nurse 12, non-ICU, pre-trial interview).*  
51  
52  
53  
54  
55  
56  
57

### 3.2. Organising the 12-hour shift schedule

The planning and organising of the 12-hour rotating shifts was not problematic in the non-ICU but was frustrating for those responsible for the rotation plans in the ICU. The ICU had eight nurses working 12-hour shifts on the weekends: four on day shifts and four on night shifts. In general, the rotation plans in the ICU unit were complicated. The unit divided all nurses into three groups, and every shift team within each group had to include the right formal competencies, and a specified mix of nurses with extensive experience and those with less experience. The planners had to consider adjustments because of the patient mix and for individual employees. For example, some nurses were insufficiently experienced to feel comfortable working alone with very sick infants. Others did not have the competencies to comfortably perform all the specialised roles and tasks that might be required of them during a shift, based on the skills mix of their on-shift colleagues. A willingness to adjust the schedule to accommodate individual employee preferences, together with meeting other competency and experience profile criteria for every shift, made planning a rotating roster a complex task. The addition to this complexity by having to include 12-hour shifts caused frustration for the planners. However, the trial period was extended by 6 months, and the planners said that planning the 12-hour shifts became easier as they gained experience.

### 3.4. Consequences of working 12-hour shifts

#### 3.4.1. Taking rest breaks as planned

We asked participants whether they could take rest breaks as planned when they worked 12-hours instead of 8-hours shifts, and most of the respondents did not experience any difficulties.

*That went as planned. One weekend, my rest break was moved half an hour, but that was okay. It was right after an 8-hour shift started, and there*

1  
2  
3 *were too few experienced nurses on duty, so I felt I couldn't take my break*  
4 *exactly when planned. But otherwise, I think we could all take the planned*  
5 *rests and pauses (Nurse 1, ICU, in-trial interview).*  
6  
7  
8  
9

10 The non-ICU had a room with a bed for the nurses' use, for napping and relaxing for 1  
11  
12 hour when working 12-hour shifts. Their experience with this was positive.  
13

14  
15 *That [the bed in a designated room] was very comfortable. Nobody called*  
16 *me on my phone and no one came into the room. The others respected this*  
17 *hour [for rest], and the threshold for knocking at that door was high (Nurse*  
18 *1, non-ICU, in-trial interview).*  
19  
20  
21  
22

23  
24 However, not all respondents had good experiences trying to nap during their shift:  
25

26  
27 *Well, I slept once or twice during my 1-hour break during the night shift.*  
28 *But when I woke up I was feeling queasy. I was very tired when I woke up*  
29 *and felt off-balance. So, I have stopped napping during the 12-hour night*  
30 *shift (Nurse 10, non-ICU, in-trial interview).*  
31  
32  
33  
34  
35

36  
37 We asked how she spent that hour during the following 12-hour night shifts  
38 afterwards. She answered:  
39

40  
41  
42 *I can lie down for a little while, but I keep the lights on. I can listen to*  
43 *music or watch TV on my mobile (Nurse 10, non-ICU, in-trial interview).*  
44  
45  
46

47 Some created their own mix of activities during the 1-hour break at night:  
48

49  
50 *In my break during the night, first I sleep half an hour and then I watch a*  
51 *film or an episode from a TV show. The first few times, I slept for the whole*  
52 *hour, but I was unwell when I woke up, and I couldn't sleep when I got*  
53  
54  
55  
56  
57

1  
2  
3 *home. After I started with half an hour of sleep and half an hour watching*  
4 *something, I felt much better (Nurse 13, non-ICU, in-trial interview).*  
5  
6  
7

8 Another nurse working in the non-ICU described her experience:  
9

10 *I'm a bit queasy at first when I wake up, but I'm okay once I get on my feet.*  
11 *I think it is safer to have this nap because I have to drive home after the*  
12 *night shift (Nurse 11, non-ICU, in-trial interview).*  
13  
14  
15  
16  
17

18 One of the respondents had a more determined approach to sleeping:  
19

20 *Yes, I was able to get some sleep during both the day shifts and the night*  
21 *shifts. I have become quite good at power napping, and I had decided that I*  
22 *wanted to be good at that. I was not very good at it before, but now I can*  
23 *do it. I fall asleep quite simply now (Nurse 7, non-ICU, in-trial interview).*  
24  
25  
26  
27  
28  
29

30 Some of the nurses went outside during their break for fresh air, especially if the weather  
31 was pleasant. Others rested before their shift, saying that they did not need to sleep, but it still  
32 felt good to lie down and relax, and to think about something other than work.  
33  
34  
35  
36

37 However, working in a hospital entails a level of uncertainty, and many unplanned events  
38 during the shift can make it impossible to take the planned rest breaks.  
39  
40  
41

42 *Last weekend, on the first night, I had two emergency patients who were*  
43 *very ill. There was much uncertainty about whether they had to be operated*  
44 *on during the night. In addition to these two, I had one uneasy patient and*  
45 *one mentally ill patient who needed constant monitoring. The night after, at*  
46 *1.30 am, the alarm sounded because a patient had a cardiac arrest, and we*  
47 *had to use the defibrillator and perform chest compressions. I think it took*  
48 *2.5 hours before we got the patient to the ICU. That weekend, I did not get*  
49  
50  
51  
52  
53  
54  
55  
56  
57

1  
2  
3 *my 1-hour rest break during any of the night shifts (Nurse 2, non-ICU, in-*  
4 *trial interview).*

### 8 **3.4.2. Health consequences**

9 The nurses in the non-ICU discussed the health effects of working 12-hour shifts.  
10 Some of the nurses did not feel any difference compared with working 8-hour shifts, but  
11 they needed the day off after the work weekend to recover. Others described different  
12 negative experiences of working longer shifts than usual:  
13  
14  
15  
16  
17

18  
19 *At the end of the shift, I had a headache and my eyes were dry and sore*  
20 *from the dry air in the unit. I felt like I had been at work for a long time*  
21 *(Nurse 15, non-ICU, in-trial interview).*

22  
23  
24  
25  
26 Others mentioned health problems that may have been worsened by working long shifts:

27  
28  
29 *The night-shift weekends are very demanding, but fortunately, they only*  
30 *occur every 8 weeks. The weekends with the day shifts are okay, but I have*  
31 *back problems, and my back is sore after work weekends. Maybe I should*  
32 *not work in this way, but the carrot is, of course, that I get to work every*  
33 *fourth weekend instead of every third weekend (Nurse 11, non-ICU, in-trial*  
34 *interview).*

35  
36  
37  
38  
39  
40  
41  
42  
43 Most of the participants felt greater fatigue in their legs after a 12-hour shift, but some did  
44 not, despite the longer time spent standing and walking compared with an 8-hour shift. Most  
45 of the respondents described having a “tired head” after a 12-hour shift, but few reported any  
46 unexpected physical pain or health problems.  
47  
48  
49  
50

51  
52 *I think it has been okay, but I get a burning sensation under my feet, and*  
53 *feel tired. And, of course, at the end of the shift on the first weekend, I*

1  
2  
3 *really hoped there would be no childbirth in the evening. You think such*  
4  
5 *thoughts. (Nurse 6, ICU, in-trial interview).*  
6  
7

8 Another nurse had the opposite experience:  
9

10  
11 *I worked 12-hour day shifts both Saturday and Sunday. It occurred to me*  
12  
13 *that I can't remember the last time I wasn't exhausted after a shift. But this*  
14  
15 *weekend, my legs were less tired than on a regular work weekend. I wasn't*  
16  
17 *physically tired at all from working this weekend (Nurse 5, ICU, in-trial*  
18  
19 *interview).*  
20  
21

22 Some of the participants found it more difficult to work 12-hour day shifts than 12-hour  
23  
24 night shifts:  
25

26  
27 *The days are a bit longer than the nights. The difference between a 10-hour*  
28  
29 *and 12-hour night shift is small, but the day... You need better shoes*  
30  
31 *because your legs get tired (Nurse 3, ICU, in-trial interview).*  
32  
33

34  
35 The nurses in the non-ICU expressed uniform satisfaction with the opportunity to lie  
36  
37 down during the 1-hour break:  
38

39  
40 *I do not feel more tired than usual. I feel the night shifts are very good, with*  
41  
42 *the 1-hour rest break. It is almost the worst [to work] the night before*  
43  
44 *Saturday, because then we work a regular night shift without the*  
45  
46 *mandatory break. I almost look forward to the next night when I work 12*  
47  
48 *hours and get to have a break for a whole hour (Nurse 13, non-ICU, in-*  
49  
50 *trial interview).*  
51  
52  
53  
54  
55  
56  
57



### 3.4.3. Patient outcomes

None of the respondents admitted to making any mistakes during their 12-hour shifts, but they were not always sure:

*I did not make any mistakes. But one thinks about it—after 11 hours, it could be easy to misread a graph, or something similar. Not that it has happened, but we are not as awake at the end of the shift as at the beginning (Nurse 2, non-ICU, in-trial interview).*

When asked about observed patient outcomes, some nurses said that they did not think patients noticed much difference. Some patients in the non-ICU had observed that some of the nurses were present for a long time, and had asked them about this. The nurses did not receive any negative reactions from the patients after explaining the trial, only positive responses. They also adjusted their rest break to their work tasks to minimise the consequences for the patients.

*I take my rest break after I have finished distributing medication, pain relievers, and meals, so my patients don't often need to call for someone else during my break (Nurse 13, non-ICU, post-trial interview).*

### 3.4.4. Family situation and friends

Most respondents felt that the most important positive consequence of working 12-hour shifts was only having to work every fourth weekend, instead of every third. They felt this was important because of their family situations.

*[Working] every fourth weekend instead of every third is very important to me, especially since my second child was born. It's okay to have time off during the weekdays, but this is not when my family has time off. So*

1  
2  
3 *weekends off are very precious to me (Nurse 1, non-ICU, in-trial*  
4 *interview).*  
5  
6  
7

8 Some nurses had asked their family explicitly what they thought about the 12-hour shifts:  
9

10 *They are happy I'm home on more weekends. Whether I work a 12-hour or*  
11 *8-hour shift during the weekend does not matter to them. Maybe I sleep*  
12 *more during the regular work weekends, so the kids do not see me much on*  
13 *these weekends anyway (Nurse 11, non-ICU, in-trial interview).*  
14  
15  
16  
17  
18  
19

20 Individual family situations sometimes necessitated adjustments to the work schedule:  
21

22 *I have my son every second weekend, and this is the only reason for me to*  
23 *work the 12-hour shifts every fourth instead of every third weekend (Nurse*  
24 *16, non-ICU, in-trial interview).*  
25  
26  
27  
28  
29

30 Some of the nurses without children also valued the weekend more than weekdays for  
31 many reasons:  
32

33 *...none of my friends outside of work do shift-work, so for me, the weekends*  
34 *are sacred (Nurse 15, non-ICU, in-trial interview).*  
35  
36  
37  
38  
39

40 Family needs could be demanding for nurses with young children. For example:  
41

42 *As a joke, I say that my job at the hospital is my second job, because my*  
43 *main job is at home. I have many things to keep track on at home, and*  
44 *when I have a work weekend, I still want to be with the kids. I feel bad*  
45 *about going to work, so when I get up in the morning, I must organise*  
46 *everything [my kids might need]. But when I work 12-hour shifts, I say to*  
47 *myself, "Okay this is my work weekend", and then I concentrate on that*  
48  
49  
50  
51  
52  
53  
54  
55  
56  
57

1  
2  
3 *and think about the fact that I have three weekends off afterwards when I*  
4 *can be with my children (Nurse 7, non-ICU, in-trial interview).*  
5  
6  
7

8 All participants who were married noted that their husbands wanted them to work 12-  
9  
10 hour shifts every fourth weekend instead of 8-hour shifts every third weekend.  
11

12  
13 *My husband wants me to work the 12-hour shift weekends. He takes the*  
14 *kids to visit their grandparents on my work weekends and I have a quiet*  
15 *house. This is fine for them and for me (Nurse 13, non-ICU, in-trial*  
16 *interview).*  
17  
18  
19  
20  
21

22 A more experienced nurse with adult children also noted that her husband liked this  
23 arrangement:  
24  
25

26  
27 *My husband thinks this is fine, because we can go to our holiday cabin on*  
28 *more weekends than before. And on my work weekend, he can go to the*  
29 *cabin alone, because all I do that weekend is work (Nurse 8, ICU, in-trial*  
30 *interview).*  
31  
32  
33  
34  
35  
36

37 However, others felt they missed out at home when they worked a long shift on Saturday:  
38  
39

40 *It was wonderful to get home at 8 pm on Saturday night and have a nice*  
41 *meal and relax with my boyfriend. This gave me a bit more of a weekend*  
42 *feeling. Two or three hours of rest before going to bed was good. Now, I*  
43 *get home at 10.30 pm and feel I must rush to bed to get enough sleep before*  
44 *the next shift (Nurse 2, non-ICU, in-trial interview).*  
45  
46  
47  
48  
49  
50

#### 51 **3.4.5. Tasks at work**

52

53 Many of the participants experienced greater flexibility during the 12-hour shifts than the  
54 8-hour shifts.  
55  
56  
57

1  
2  
3 *The 12-hour night shifts have been terrific. I have a much better overview*  
4 *when I arrive at 8 pm and can start the evening round of medicines, start to*  
5 *get the antibiotics ready, organise the medicine for the next day, and so on.*  
6  
7 *And I finish my round earlier compared with when we start working at*  
8  
9 *9.30 or 10 pm (Nurse 10, non-ICU, in-trial interview).*  
10  
11  
12  
13

14 The nurses also commented that they experienced fewer interruptions of work tasks  
15 during the 12-hour shifts:  
16

17  
18  
19 *I noticed this at the time that would have been the regular shift change*  
20 *[had it been an 8-hour day], when we were in the middle of a procedure,*  
21 *on one of the days when I worked the 12-hour day shift. I was assisting a*  
22 *doctor with a lengthy procedure, and usually one gets a bit stressed at such*  
23 *times, because we have to finish the report and everything else before the*  
24 *next shift starts at 2.30 pm. And then I thought, “God, this is actually very*  
25 *good”, because I could relax and concentrate on what I was doing, and I*  
26 *took my time and calmly finished the procedure around 4 pm. Usually, I*  
27 *would have to hand over to the next nurse during the procedure and give a*  
28 *short oral report. We lose continuity this way, because the doctors are*  
29 *there the entire day. So I think it’s better for all [having 12-hour shifts]. I*  
30 *didn’t have a ticking clock at the back of my mind all day (Nurse 1, ICU,*  
31 *in-trial interview).*  
32  
33  
34  
35  
36  
37  
38  
39  
40  
41  
42  
43  
44  
45  
46  
47

48 This nurse also commented on the satisfying experience of completing jobs on her own,  
49 rather than having to leave them to the next shift:  
50

51  
52  
53 *And I feel that I get to do what I’m supposed to do on the days I work 12-*  
54 *hour shifts. Instead of telling the next nurse what I have planned to do, I do*  
55  
56  
57

1  
2  
3 *it myself. Because I can't be sure that the next nurse has the same priorities*  
4 *and will do what I planned (Nurse 1, ICU, in-trial interview).*  
5  
6  
7

8 Being present in the unit for a longer time may make the job easier because the nurses can  
9  
10 prepare and get to know patients better. During the trial period, the participants always  
11  
12 worked on the Friday before. Some noted that this prepared them better for the long shifts on  
13  
14 Saturday and Sunday because they knew what to expect, having learned more about the  
15  
16 patients in the ward.  
17

18  
19 Several participants also felt they could plan and structure a long shift better:  
20

21 *The ward is usually busy, and I have had work weekends where I have been*  
22 *very tired and have been very happy to go home at 3 pm. However, I have*  
23 *not always been happy with my work, because too much was left for the*  
24 *next shift [to finish]. Now I can plan better and complete all my tasks*  
25 *(Nurse 9, non-ICU, in-trial interview).*  
26  
27  
28  
29  
30  
31  
32

33 Other nurses reported similar experiences:  
34  
35

36 *If you've promised the parents the infant will have a bath, you don't have*  
37 *to stress and do it early in the day; you can plan to find a calmer period, to*  
38 *have more time available for the task (Nurse 9, ICU, in-trial interview).*  
39  
40  
41  
42

43 Another nurse at the same unit had similar experiences working night shifts:  
44  
45

46 *I think I do the same as usual. However, I think I have more time to do my*  
47 *tasks. Nothing must be done right away because I'm going to be here until*  
48 *the next day (Nurse 4, ICU, in-trial interview)*  
49  
50  
51  
52  
53  
54  
55  
56  
57  
58  
59  
60

### 3.5. Decisions after the end of the trial period

The ICU decided not to continue the 12-hour weekend shifts after the trial period, whereas the non-ICU decided to allow more nurses to try out this approach.

For the nurses in the non-ICU, working fewer weekends and being able to provide a higher quality of care were the main reasons for continuing to work the 12-hour shifts. Some participants had not expected the 12-hour shifts to be successful in this very busy unit, but realised that they liked working longer shifts:

*I liked working 12-hour shifts very much. I was sceptical the first time I heard about it, but I wanted to try. I think they are suitable for me [because] I have good capacity to work, and think that when I'm at work, I like to work hard. I can tolerate this [way of working], but I have not been sick and I can handle the pressure quite well (Nurse 7, non-ICU, post-trial interview).*

The participants from the ICU reported mixed experiences at the end of the trial period. Some were unhappy about the decision not to implement 12-hour shifts as part of the regular schedule once the trial period was finished. They argued that this decision was only made because the schedule planners found it difficult to implement 12-hour shift schedules. When one participant was asked whether the scheduling process could be made easier if the unit were organised differently, she replied:

*Yes, without doubt. If we were divided into two groups instead of three it would be much easier to make up the shift plans. We would have more people to choose from and that would give more flexibility (Nurse 7, ICU, post-trial interview).*

1  
2  
3 Another nurse in the ICU also wanted the 12-hour shifts to be continued, and shared the  
4  
5 following experience after the trial ended.  
6

7  
8 *Now I see a lot of work weekends on my shift plan. I experienced a*  
9  
10 *significant difference between working every fourth and every third*  
11  
12 *weekend. Now, there are more conflicts with other things that happen*  
13  
14 *outside work. I did not experience this to the same extent when I worked*  
15  
16 *every fourth weekend (Nurse 1, ICU, post-trial interview).*  
17

18  
19 Others were indifferent about the decision not to continue the 12-hour shifts:  
20

21  
22 *I haven't really engaged in this discussion; I just noticed that they didn't*  
23  
24 *want to continue. My first thought was that it [the decision] sucked, but*  
25  
26 *then I decided to focus my energy on doing my job instead (Nurse 5, ICU,*  
27  
28 *post-trial interview).*  
29

30  
31 A small group of nurses had decided not to continue with the 12-hour shifts before  
32  
33 management decided not to continue. Not all nurses shared a clear preference for avoiding  
34  
35 working on weekends:  
36  
37

38  
39 *Well, I don't have small children. For some, the 12-hour shifts are better—*  
40  
41 *for instance, those only working night shifts and those who have to*  
42  
43 *commute longer distances (Nurse 4, ICU, post-trial interview).*  
44

45  
46 *Well, it is good to have an extra weekend off, but I must work much more*  
47  
48 *during the weekdays Monday to Friday. That's what everybody else does.*  
49  
50 *But I'm happy working shifts with more time off on weekdays (Nurse 2,*  
51  
52 *ICU, post-trial interview).*  
53

1  
2  
3 Some ICU nurses who had been sceptical before the trial had positive experiences and  
4 wanted to continue. Others who had been positive before the trial did not want to continue  
5 working 12-hour shifts after the trial. This indicates that it may be difficult for nurses to  
6 anticipate their own preferences for shift lengths accurately, before trying them in practice.  
7  
8  
9  
10

#### 11 12 13 **4. Discussion** 14

15  
16 This qualitative longitudinal study followed nurses for 18 months before, during, and  
17 after they trialled working 12-hour shifts on weekends for 1 year. Their participation in the  
18 12-hour shift work was completely voluntary, and only those motivated to work the 12-hour  
19 shifts participated. The aim of the study was to understand the nurses' individual experiences.  
20  
21 Their perceptions give insight into the potential consequences of any future reform to  
22 increase the standard shift length for hospital nurses from 8 hours to 12 hours. In the  
23 following sections, we discuss the themes that emerged from this research: job satisfaction,  
24 health effects, effects on sleep, patient safety, and employee safety.  
25  
26  
27  
28  
29  
30  
31  
32

33 We asked all respondents how they perceived their work environment and all  
34 participating nurses had favourable perceptions of their work environment. This may be an  
35 important condition for implementing new shift arrangements. The ICU was reorganised  
36 when the trial period started, and all nurses were divided into three groups with different  
37 tasks. During the interviews, it appeared that not all employees were satisfied with the new  
38 organisation of the unit. Their main argument against the reorganisation was that they had  
39 each ended up with a narrower spectrum of work tasks than desired. Such changes may have  
40 negative impact especially on job satisfaction.  
41  
42  
43  
44  
45  
46  
47  
48  
49  
50  
51  
52  
53  
54  
55  
56  
57  
58  
59  
60



#### 4.1. *Job satisfaction*

Job satisfaction was high overall among the participants. In the non-ICU, the nurses were generally happy that the use of 12-hour shifts would continue, and more nurses wanted to try the extended shifts. In the ICU, the nurses had mixed reactions to the managers' decision not to continue the 12-hour shifts. Some thought this was a poor decision; others were indifferent or supportive. Overall job satisfaction at the units does not appear to have been affected by the 12-hour shifts. However, different preferences may affect the nurses' ongoing job satisfaction at the individual level. This is consistent with the findings of Kundi et al. (1995), who found similar levels of job satisfaction between 8-hour shift workers and 12-hour shift workers. In our study, only volunteers were included, and no one was forced to work the extended shift against their will. This study therefore cannot rule out the possibility of negative consequences on job satisfaction if nurses are forced to work longer shifts, rather than volunteering.

#### 4.2. *Health effects*

Because participation was voluntary, and the same nurses were followed for 18 months, this study was able to probe factors behind the stress and burnout reported in the literature (Chen et al., 2014; Dall et al., 2015; Iskera-golec et al., 1996). Because the 12-hour shift was implemented only on weekends, we expected to see less significant effects on health and wellbeing among the participating nurses compared with those working 12-hour shifts throughout the week in other studies. Most of the participants in our study experienced a greater physical and mental workload during 12-hour shifts compared with 8-hour shifts. This was mainly because of the longer time spent walking and standing, and being exposed to the dry air in the units. A recovery period was needed after a 12-hour shift weekend. The nurses commented that pre-existing health problems might be worsened by working long shifts.

1  
2  
3 Some had health concerns before they started the trial, but still felt that there were advantages  
4 of working every fourth instead of every third weekend and wished to continue. It is possible  
5 that these nurses overlooked or underreported negative health consequences of the longer  
6 shifts. We suggest that negative health effects of 12-hours shifts will be significant if  
7 employees with health problems are forced to work longer shifts than they can tolerate given  
8 their health status.  
9  
10  
11  
12  
13  
14  
15

#### 16 17 *4.3. Effects on sleep*

18  
19  
20 The literature shows that nurses accrue considerable sleep debt while working successive  
21 12-hour shifts, with accompanying fatigue and sleepiness, and that some nurses are more  
22 severely affected by sleep loss than others, as measured by attention lapses (Geiger-Brown et  
23 al., 2012). In this study, the 12-hour shifts were worked only on weekends and were  
24 voluntary, and the effect on sleep was expected to be slight. We find that those who reported  
25 sleeping problems in the pre-trial interviews had the same sleeping problems when they were  
26 working 12-hour shifts. None of the participants reported having sleep problems from starting  
27 to work 12-hour shifts. However, we cannot rule out the possibility that the nurses who self-  
28 selected to participate were less susceptible to sleep problems than those who opted out.  
29  
30  
31  
32  
33  
34  
35  
36  
37  
38  
39  
40  
41  
42  
43  
44  
45  
46  
47  
48  
49  
50  
51  
52  
53  
54  
55  
56  
57  
58  
59  
60

However, of the 24 participants, many reported sleeping problems in the pre-trial interviews, so the opposite may also be the case. We suggest that the observed variation in individual sleep quality gives an important argument for hospital owners to offer the nurses and other employee different choices of working hour agreements.

#### 50 51 *4.4. Patient safety*

52  
53  
54  
55  
56  
57  
58  
59  
60

There is some evidence that longer work hours for hospital staff can increase the risk of errors and hospital-associated infection among patients (Scott et al. 2006; Virtanen et al., 2009). However, a systematic literature review concluded that more evidence is needed to

1  
2  
3 conclude whether there is a causal relationship between long work hours and adverse patient  
4 outcomes (Bae and Fabry, 2014). In this study, all participants acknowledged that the risk of  
5 mistakes was higher at the end than at the beginning of a shift. However, none of the nurses  
6 reported making mistakes during the trial period.  
7  
8  
9

10  
11 One finding that is rarely reported in the literature is a positive effect on patients and the  
12 quality of care from longer nurse work hours—yet this was reported by our participants. Most  
13 felt they had more time to complete their tasks, and the opportunity to follow their patients  
14 for longer during each shift.  
15  
16  
17

18  
19 We did not interview the doctors, and we do not know whether this trial had any effects  
20 on them. However, it is plausible the doctors benefited from having fewer disruptions during  
21 procedures for hand-overs between the nurses working different shifts, and from having  
22 fewer nurses to communicate with during the day.  
23  
24  
25  
26  
27

28  
29 The 12-hour night shifts were perceived to work well in this trial, especially in the non-  
30 ICU, where nurses had their own room with a bed for resting. A recent study reported that  
31 12-hour night shift workers exhibit more performance variability and subjective sleepiness  
32 than day workers, and suggests that workplace napping may be considered (Wilson et al.,  
33 2017). We find that the 1-hour rest break available to the nurses working 12-hour night shift  
34 in our study, was very appreciated by the nurses. The 1-hour break was used in various ways  
35 by the nurses, and most satisfaction was expressed by those who had access to a designated  
36 room with a bed where they could lay down in their 1-hour rest break during the night shift.  
37  
38  
39  
40  
41  
42  
43  
44  
45  
46  
47  
48  
49  
50  
51  
52  
53  
54  
55  
56  
57  
58  
59  
60  
This arrangement may have contributed to the lower level of sleepiness and performance  
variability self-reported by nurses in our study.

Turning to the long duration of night shifts in this study, the participating nurses had  
positive experiences with the 12-hour night shifts overall. Several factors may account for

1  
2  
3 this. Notably, all participants in the medical unit felt that having a bed in a designated staff  
4 room for rest breaks during the long night shifts was an advantage. This may be an effective  
5 method for reducing the increased risk of accidents in long shifts reported in the literature  
6 (Wagstaff and Lie, 2011).  
7  
8  
9  
10

#### 11 12 *4.5. Employee safety* 13

14  
15 Shift work generally, and night shifts and long shifts in particular, are frequently  
16 associated with adverse effects on employees. However, this study found mixed views on the  
17 employee safety implications of longer (12-hour) shifts, including for the night shifts.  
18  
19

20  
21 On one hand, the managers of both units argued that “pure” night shift workers became  
22 an isolated group, whom the managers never met and who did not receive the professional  
23 updates received by nurses working days and evenings. They therefore wanted the night  
24 shifts to be spread among more nurses, and had reduced the size of the designated pure night  
25 team, i.e., the nurses working night shifts exclusively.  
26  
27  
28  
29  
30  
31

32  
33 On the other hand, this change was not preferred by most of the nurses—regardless of  
34 whether they wanted to work primarily nights or did not handle night work well. The  
35 literature suggests a possible explanation. Wagstaff and Lie (2011) concluded that pure night  
36 work may provide some protection against the negative health effects often reported from  
37 intermittent night shift work, by allowing resynchronisation. Therefore, there may be good  
38 arguments for reintroducing pure night shift teams. Moreover, if night shifts are 12 hours  
39 long, the alienation mentioned by managers may be reduced, because the night shift nurses  
40 arrive earlier in the evenings to start their shift and therefore participate in some of the same  
41 activities as nurses working the evening shift. On the other hand, some nurses did not want to  
42 change from a two-shift system to a three-shift system. This may be explained in part by a  
43  
44  
45  
46  
47  
48  
49  
50  
51  
52  
53  
54  
55  
56  
57  
58  
59  
60

1  
2  
3 recent study of combined in-field and laboratory experiments that concluded that chronic  
4  
5 shift work causes night shift intolerance (Li et al., 2017).  
6  
7

### 8 *An overall evaluation* 9

10  
11 We agree with Ferguson and Dawson (2012), who concluded that there is no simple “yes  
12  
13 or no” answer to the choice between 12-hour versus 8-hour shifts. They argued that the  
14  
15 answer depends on the context, including the work tasks, workforce, and workplace.  
16  
17 However, we wish to add another dimension: individual preferences.  
18  
19

20 Individual nurses’ preferences are heterogeneous even within the same unit. It is not easy  
21  
22 to obtain a clear picture of the diversity of preferences using quantitative methods. Moreover,  
23  
24 a given individual’s preference will change over time as her or his family and health situation  
25  
26 evolves, and depending on the situation at work. Therefore, no universal decision about shift  
27  
28 length preferences is possible; rather, continuous dynamic assessment of the most suitable  
29  
30 shift length and rotation scheme for each employee is needed, if the aim is to reduce the  
31  
32 adverse outcomes of shift work.  
33  
34

35 The scoping review by Harris et al. (2015) suggests that there may always be insufficient  
36  
37 evidence to justify either the widespread implementation or the withdrawal of 12-hour shifts  
38  
39 for nurses. They concluded that the real benefits, and whether there are real and unacceptable  
40  
41 risks to patients and staff, are unknown. They also noted that more research is needed to  
42  
43 understand the long-term effects, as opposed to more easily measured short-term effects.  
44  
45

46 We suggest that the mixed results in previous studies reflect the fact that there is simply  
47  
48 no universally correct answer to this question, because of the differences in context but also  
49  
50 the heterogeneity and dynamic nature of individual preferences and tolerance. We argue that  
51  
52 the observed diversity of expectations and experiences, and the strength of different nurses’  
53  
54  
55  
56  
57  
58  
59  
60

1  
2  
3 contrasting preferences about long shifts, indicate that 12-hour shifts should be completely  
4  
5 voluntary, rather than being either mandated or banned as a universal policy.  
6  
7

## 8 **5. Strengths and limitations**

9

10  
11 A key strength of this study is its longitudinal design. The nurses trialled 12-hour shifts  
12  
13 for 1 year, and their perspectives were obtained over an 18-month period that captured the  
14  
15 nurses' views before, during, and after the intervention. Another strength is the richness and  
16  
17 authenticity of individual experiences that can be revealed by a qualitative methodology  
18  
19 based on a relatively unstructured interview format.  
20  
21

22  
23 A key limitation is the small sample size of 24 nurses. However, given that our qualitative  
24  
25 research design based on interviews was unsuitable for very large sample sizes, a more  
26  
27 important limitation is that we excluded nurses who did not wish to trial the 12-hour shifts. It  
28  
29 is possible this study underestimates the risk of adverse outcomes from 12-hour shifts, as  
30  
31 nurses who knew they would be susceptible to such outcomes likely chose not to participate.  
32  
33 This aspect of the study design was determined by ethical considerations: as it would be  
34  
35 highly unethical to force someone to work 12-hour shifts against their will, a requirement for  
36  
37 study approval was that the 12-hour shifts would be voluntary. Additionally, we suspect that  
38  
39 negative health consequences of working 12-hour shifts were underreported by the  
40  
41 participants, as many wanted the trial to succeed so they could work only every fourth  
42  
43 weekend instead of every third weekend.  
44  
45  
46

## 47 **6. Conclusion**

48

49  
50 This study revealed the diversity of nurses' preferences for working 12-hour shifts. While  
51  
52 the experience of working 12-hour shifts was positive for most of the participating nurses in  
53  
54 our study, it was not universally preferred. We suggest that individual preference for working  
55  
56  
57

1  
2  
3 12-hour shifts is a function of own health situation, family situation, work load tolerance,  
4  
5 degree of sleep problems, personality and other factors.  
6

7 Based on these findings, we recommend that working 12-hour shifts in public hospitals  
8  
9 should be voluntary. Pushing nurses into working long shifts against their will could  
10  
11 negatively affect their health, job satisfaction, and general life quality, and drive them away  
12  
13 from the profession.  
14

15  
16  
17 a. Contributorship statement

18 All authors contributed to designing the study and conducting and coding the interviews. The  
19  
20 first author drafted the manuscript, and the other authors contributed significantly to the final  
21  
22 version.  
23  
24

25  
26  
27 b. Competing interests

28 The authors declare that they have no conflict of interest.  
29  
30  
31

32  
33  
34 c. Funding

35 This project was funded mainly by the Research Council of Norway. The main hospital  
36  
37 employer organisation (SPEKTER), the nurses' union (NSF), and the nursing assistants'  
38  
39 union (Fagforbundet) financed the same yearly amount covering in total one-fifth of the  
40  
41 project's total cost. None of the funding bodies read the manuscript or had any influence on  
42  
43 the results.  
44  
45  
46

47  
48  
49 d. Data sharing statement

50 All interviews were recorded and converted to text files. The text files are in Norwegian and  
51  
52 can be made available upon request. Written informed consent was obtained from all  
53  
54 participants.  
55  
56  
57

## References

- Admi, H., Tzischinsky, O., Epstein, R., Herer, P., Lavie, P. 2008. Shift work in nursing: is it really a risk factor for nurses' health and patients' safety? *Nurs. Econ.* 26, 250–257.
- Bae, S.-H., Fabry, D. 2014. Assessing the relationships between nurse work hours/overtime and nurse and patient outcomes: systematic literature review. *Nurs. Outlook* 62, 138–156.
- Banakhar, M. 2017. The impact of 12-hour shifts on nurses' health, wellbeing, and job satisfaction: A systematic review. *J. Nurs. Educ. Pract.* 7, 69.
- Bergene, A.C., Egeland, C. 2016. Interventionism as a union strategy? The strategies of the Norwegian Nurses Organisation in relation to temporary agency work. *Transfer Eur. Rev. Labour Res.* 22, 521–534. doi: 10.1177/1024258916667027.
- Chen, J., Davis, K.G., Daraiseh, N.M., Pan, W., Davis, L.S. 2014. Fatigue and recovery in 12-hour dayshift hospital nurses. *J. Nurs. Manag.* 22, 593–603.
- Dall'Ora, C., Griffiths, P., Ball, J., Simon, M., H Aiken, L.H. 2015. Association of 12-h shifts and nurses' job satisfaction, burnout and intention to leave: findings from a cross-sectional study of 12 European countries. *BMJ Open* 5, e008331. doi: 10.1136/bmjopen-2015-008331.
- Estabrooks, C.A., Cummings, G.G., Olivo, S.A., Squires, J.E., Giblin, C., Simpson, N. 2009. Effects of shift length on quality of patient care and health provider outcomes: systematic review. *Qual. Saf. Health Care* 18, 181–188.
- Ferguson, S.A., Dawson, D. 2012. 12-h or 8-h shifts? It depends. *Sleep Med. Rev.* 16, 519–528.



- 1  
2  
3 Geiger-Brown, J., Rogers, V.E., Trinkoff, A.M., Kane, R.L., Bausell, R.B., Scharf, S.M.  
4  
5 2012. Sleep, sleepiness, fatigue, and performance of 12-hour-shift nurses. *Chronobiol.*  
6  
7 *Int.* 29, 211–219.  
8  
9 Gupta, N., Diallo, K., Zurn P., Dal Poz, M.R. 2003. Assessing human resources for health:  
10  
11 what can be learned from labour force surveys? *Hum. Resour. Health* 1, 5.  
12  
13 Han, K., Trinkoff, A.M., Geiger-Brown, J. 2014. Factors associated with work-related fatigue  
14  
15 and recovery in hospital nurses working 12-hour shifts. *Workplace Health Saf.* 62, 409–  
16  
17 414.  
18  
19 Harris, R., Sims, S., Parr, J., Davies, N. 2015. Impact of 12-hour shift patterns in nursing: a  
20  
21 scoping review. *Int. J. Nurs. Stud.* 52, 605–634.  
22  
23 Hoffman, A.J., Scott, L.D. 2003. Role stress and career satisfaction among registered nurses  
24  
25 by work shift patterns. *J. Nurs. Adm.* 33, 337–342.  
26  
27  
28 Iskera-golec, I., Folkard, S., Marek, T., Noworol, C. 1996. Health, well-being and burnout of  
29  
30 ICU nurses on 12-and 8-h shifts. *Work Stress* 10, 251–256.  
31  
32 Kundi, M., Koller, M., Stefan, H., Lehner, L., Kaindlstorfer, S., Rottenbacher, S. 1995.  
33  
34 Attitudes of nurses towards 8-h and 12-h shift systems. *Work Stress* 9, 134–139.  
35  
36  
37 Li, P., Morris, C.J., Patxot, M., Yugay, T., Mistretta, J., Purvis, T.E., Scheer, F.A.J.L., Hu, K.  
38  
39 2017. Reduced tolerance to night shift in chronic shift workers: insight from fractal  
40  
41 regulation. *Sleep* 40, 1 July 2017. doi: 10.1093/sleep/zsx092.  
42  
43  
44 OECD. 2014. OECD Reviews of Health Care Quality: Norway 2014. OECD Publishing,  
45  
46 Paris.  
47  
48 Ose, S.O. 2016. Using Excel and Word to structure qualitative data. *J. Appl. Soc. Sci.* 10,  
49  
50 147–162.  
51  
52 Scott, L.D., Rogers, A.E., Hwang, W.-T., Zhang, Y. 2006. Effects of critical care nurses'  
53  
54 work hours on vigilance and patients' safety. *Am. J. Crit. Care* 15, 30–37.  
55  
56  
57  
58  
59  
60

- 1  
2  
3 Stone, P.W., Du, Y., Cowell, R., Amsterdam, N., Helfrich, T.A., Linn, R.W., Gladstein, A.,  
4  
5 Walsh, M., Mojica, L.A. 2006. Comparison of nurse, system and quality patient care  
6  
7 outcomes in 8-hour and 12-hour shifts. *Med. Care* 44, 1099–1106.  
8  
9  
10 Todd, C., Robinson, G., Reid, N. 1993. 12-hour shifts: job satisfaction of nurses. *J. Nurs.*  
11  
12 *Manag.* 1, 215–220.  
13  
14 Virtanen, M., Kurvinen, T., Terho, K., Oksanen, T., Peltonen, R., Vahtera, J., Routamaa, M.,  
15  
16 Elovainio, M., M. Kivimaki, M. 2009. Work hours, work stress, and collaboration among  
17  
18 ward staff in relation to risk of hospital-associated infection among patients. *Med. Care*  
19  
20 47, 310–318.  
21  
22  
23 Wagstaff, A.S., Lie, J.-A.S. 2011. Shift and night work and long working hours-a systematic  
24  
25 review of safety implications. *Scand. J. Work Environ. Health* 37, 173–185.  
26  
27  
28 Wilson, M., Permito, R., English, A., Albritton, S., Coogle, C., Van Dongen, H.P.A. 2017.  
29  
30 Performance and sleepiness in nurses working 12-h day shifts or night shifts in a  
31  
32 community hospital. *Accid. Anal. Prev.*  
33  
34  
35  
36  
37  
38  
39  
40  
41  
42  
43  
44  
45  
46  
47  
48  
49  
50  
51  
52  
53  
54  
55  
56  
57  
58  
59  
60

# BMJ Open

## One-year trial of 12-hour shifts in a non-intensive care unit and an intensive care unit in a public hospital: A qualitative study of 24 nurses' experiences

|                                 |                                                                                                                          |
|---------------------------------|--------------------------------------------------------------------------------------------------------------------------|
| Journal:                        | <i>BMJ Open</i>                                                                                                          |
| Manuscript ID                   | bmjopen-2018-024292.R1                                                                                                   |
| Article Type:                   | Research                                                                                                                 |
| Date Submitted by the Author:   | 03-Oct-2018                                                                                                              |
| Complete List of Authors:       | Ose, Solveig Osborg; SINTEF, Tjønnås, Maria; SINTEF, Health Kaspersen, Silje Lill; SINTEF, Health Færevik, Hilde; SINTEF |
| <b>Primary Subject Heading</b>: | Qualitative research                                                                                                     |
| Secondary Subject Heading:      | Occupational and environmental medicine                                                                                  |
| Keywords:                       | hospital, nurse, nursing workforce, 12-hours shifts, shift work, long shift tolerance                                    |
|                                 |                                                                                                                          |

SCHOLARONE™  
Manuscripts

1  
2  
3 **One-year trial of 12-hour shifts in a non-intensive care unit and**  
4  
5  
6 **an intensive care unit in a public hospital: A qualitative study of**  
7  
8 **24 nurses' experiences**  
9

10  
11 Short title: One-year trial of 12-hour shifts in a non-intensive care hospital unit and an  
12  
13 intensive care unit  
14  
15

16  
17  
18 **Corresponding author:**

19  
20 Solveig Osborg Ose

21  
22 E-mail: Solveig.ose@sintef.no

23  
24 Address: SINTEF Technology and Society, Dep. of Health,

25  
26 Postboks 4760 Torgarden, 7465 TRONDHEIM

27  
28 Phone: (+47) 907 28 684  
29  
30  
31  
32

33 *Maria Suong Tjønnås*

34 SINTEF Technology & Society, Dep. of Health, Trondheim, Norway

35  
36  
37 *Silje L. Kaspersen*

38 SINTEF Technology & Society, Dep. of Health, Trondheim, Norway

39  
40  
41 *Hilde Færevik*

42 SINTEF Technology & Society, Dep. of Health, Trondheim, Norway  
43  
44  
45  
46  
47  
48  
49  
50  
51  
52  
53  
54  
55  
56  
57  
58  
59  
60

## Abstract

*Objectives:* The aim of this study was to provide recommendations to hospital owners and employee unions about developing efficient, sustainable, and safe work-hour agreements. Employees at two clinics of a 700-bed university hospital, one a non-intensive care and the other a newborn intensive care unit, trialled 12-hour shifts on weekends for one year.

*Methods:* We systematically recorded the experiences of 24 nurses working 12-hour shifts, 16 in the medical unit and eight in the intensive care unit. All were interviewed before, during, and at the end of the trial period. The interview material was recorded, transcribed to text, and coded systematically.

*Results:* The trial participants were pleased with working 12-hour shifts on weekends; the advantage was that they worked every fourth instead of every third weekend. Every second work weekend, they worked day shifts, and every alternate work weekend, they worked night shifts. This meant that they worked 8 and 4 more hours than usual, respectively, each weekend. The expectations and experiences differed considerably between participants. Some wanted to continue working 12-hour shifts on weekends after the 1-year trial, but others did not. Although most participants handled the 12-hour shifts effectively, their individual experiences differed in terms of health consequences, effects on their family, appreciation of the extra weekend off, perceived effects on patients, and perceived work task flexibility. Working 12-hour shifts was voluntary, and many nurses did not want to work 12-hour shifts because this was not compatible with having small children or health problems.

*Conclusions:* Experiences differed considerably between participants, especially those in the intensive care unit. The work pace and work load in both units mean that not all employees prefer, or have the health, strength and tolerance, to work 12-hour shifts. If the goal is to recruit and retain nurses, nurses should be free to choose to work 12-hour shifts. No one should be forced to work more than 8 hours because of the risk to employee and patient

1  
2  
3 health, and the risk of dissatisfaction with work. The positive experiences of some nurses  
4  
5 indicate that those who wish to work 12-hour shifts should be allowed.  
6  
7

8  
9 *Keywords:*

10  
11 Hospital, nurse, nursing workforce, 12-hours shifts, shift work, long shift tolerance  
12  
13

14  
15  
16 **Article summary**

17  
18 **Strengths and limitations of this study:**

- 19  
20
- 21 • A key strength of this study is its longitudinal design.
  - 22 • The nurses trialled 12-hour shifts for 1 year, and their perspectives were obtained  
23 over an 18-month period that captured the nurses' views before, during, and after  
24 the intervention.  
25  
26
  - 27 • Another strength is the richness and authenticity of individual experiences that can  
28 be revealed by a qualitative methodology based on a relatively unstructured  
29 interview format.  
30  
31
  - 32 • The study shows the heterogeneity of nurses' preferences for and ability to  
33 tolerate 12-hour shifts.  
34  
35
  - 36 • A requirement for study approval was that the 12-hour shifts would be voluntary.  
37  
38 It is possible this study underestimates the risk of adverse outcomes from 12-hour  
39 shifts, as nurses who knew they would be susceptible to such outcomes likely  
40 chose not to participate.  
41  
42  
43  
44  
45  
46  
47  
48  
49

50  
51 **1. Introduction**

52  
53 Hospitals are round-the-clock service providers, requiring staff that contribute to the  
54 efficient use of capital investments on days, nights, and weekends. However, there is  
55  
56  
57

1  
2  
3 evidence of adverse physiological and psychological effects from shift work, including  
4  
5 disruption to the biological rhythm, sleep disorders, health problems, diminished performance  
6  
7 at work, job dissatisfaction, and social isolation.[1] The needs of hospital owners/managers  
8  
9 and hospital employees are not always compatible, which can give rise to conflicts, work  
10  
11 strikes, and unions demanding a stronger voice in staffing decisions and working time  
12  
13 arrangements.

14  
15  
16 One of the suggested solutions has been to introduce 12-hour shifts, which are becoming  
17  
18 increasingly common for hospital nurses.[2] Hospital management may prefer 12-hour shifts  
19  
20 instead of 8-hour shifts because longer shifts require fewer handovers and less overlap  
21  
22 between shifts. Employees may prefer longer shifts to compress their work into fewer days.  
23  
24 However, research has identified a wide range of associations between 12-hour shift work  
25  
26 and negative outcomes for hospital nurses.

27  
28  
29 One study found that nurses working 12-hour shifts reported less social and domestic  
30  
31 disruption, experienced more chronic fatigue, cognitive anxiety, sleep disturbances, and  
32  
33 emotional exhaustion than those working 8-hour shifts.[3] A study of 130 full-time nurses  
34  
35 working 12-hour dayshifts in three hospitals showed that nurses experienced moderate to  
36  
37 high levels of acute fatigue and moderate levels of chronic fatigue and poor inter-shift  
38  
39 recovery. In that study, lack of regular exercise and older age were associated with greater  
40  
41 acute fatigue.[4] One study based on a cross-sectional survey of 31 627 registered nurses in 2  
42  
43 170 general medical/surgical units within 488 hospitals across 12 European countries  
44  
45 concluded that longer working hours are associated with adverse outcomes for hospital  
46  
47 nurses, and that some of these adverse outcomes, such as high burnout rates, may pose safety  
48  
49 risks for both patients and nurses.[2] Another study found that registered nurses working 12-  
50  
51 hour shifts were younger, less experienced, and more stressed than colleagues working 8-  
52  
53 hour shift.[5]  
54  
55  
56  
57  
58  
59  
60

1  
2  
3 A study of 80 registered nurses found that nurses accrue considerable sleep debt while  
4 working successive 12-hour shifts, and that this is accompanied by fatigue and sleepiness. It  
5 also found that some nurses appear to be more severely affected by sleep loss than others, as  
6 measured by attention lapses.[6]  
7  
8  
9

10  
11 The authors of a recent systematic literature review suggest that 12-hour shifts may cause  
12 health problems and job dissatisfaction, but that this must be confirmed by more empirical  
13 evidence.[7]  
14  
15  
16

17  
18 An early study showed that job satisfaction decreased markedly when 12-hour shifts were  
19 introduced in 10 hospital wards; reasons included adverse effects on domestic and social  
20 arrangements.[8] A similar study of 880 nurses from 12 hospitals compared those working 8-  
21 hour shifts with those working 12-hour shifts and found that a substantial percentage of both  
22 groups (47% and 44%, respectively) had low satisfaction with their schedules and desired to  
23 change them.[9] Another study showed that nurses working 12-hour shifts were more  
24 satisfied with their jobs, experienced less emotional exhaustion, and were 10 times more  
25 likely to be satisfied with their schedules, twice as likely to perceive 12-hour schedules as  
26 important, and 58% less likely to report missing shifts; it also found that units with 12-hour  
27 shifts had lower vacancy rates.[10] This study found no differences in patient outcomes.  
28  
29  
30  
31  
32  
33  
34  
35  
36  
37  
38

39 Many studies have examined the relationship between shift duration and patient safety.  
40 One study analysed 14-day logbook data from 502 nurses and concluded that longer shift  
41 duration increased the risk of errors and near errors, and decreased nurses' vigilance.[11]  
42 Another study of 80 nurses working 12-hour shifts suggested the need for a comprehensive  
43 approach to fatigue management, including organisational support to provide healthy work  
44 schedules, favourable work environments, fewer psychological and physical demands, and  
45 assistance to improve nurses' sleep quality and quantity.[12] In a recent study of 22 nurses  
46 working 12-hour shifts, the nurses wore a wrist activity monitor, kept a diary to track their  
47  
48  
49  
50  
51  
52  
53  
54  
55  
56  
57



1  
2  
3 sleep/wake cycles for 2 weeks, and completed fatigue tests at the beginning, middle, and end  
4  
5 of four duty shifts. Compared with day-shift workers, night-shift workers exhibited more  
6  
7 performance variability and subjective sleepiness.[13]  
8

9  
10 One study of medical records of patients in 60 non-psychiatric wards in six Finnish  
11  
12 hospitals, combined with survey data from employees, concluded that long work hours, high  
13  
14 work stress, and poor collaboration among ward staff are associated with hospital-associated  
15  
16 infection among patients.[14]  
17

18  
19 A systematic literature review concluded that there is strong evidence of a positive  
20  
21 relationship between long working hours and adverse outcomes in nurses, but that more  
22  
23 evidence is needed to determine the relationship to adverse patient outcomes.[15]  
24

25  
26 A systematic review of the safety implications of long work hours concluded that shifts  
27  
28 longer than 8 hours are associated with a cumulative increase in the risk of accidents; for  
29  
30 example, the risk of accidents after 12 hours is twice that after 8 hours of work.[16]  
31

32  
33 The topic of shift length is complex, and the results are not consistent across studies.  
34  
35 Studies comparing shift length are typically based on cross-sectional data, and the  
36  
37 conclusions are based on associations. A systematic literature review of the effects of shift  
38  
39 length in healthcare settings found that few studies were of moderate or high methodological  
40  
41 quality, and that the results were difficult to compare because there is no standard measure of  
42  
43 outcomes such as the quality of patient care.[17] Other limitations are the lack of studies  
44  
45 comparing the same type of nursing units (e.g., critical care, general medicine, surgical units),  
46  
47 patients (e.g., adult, paediatric, geriatric), as well as failure to control for variables such as the  
48  
49 burden of work, unit complexity, and shift complexity.[17] Consistent with this, another  
50  
51 study found that the effects of shift duration depend on the context (e.g., work tasks,  
52  
53 workforce, and workplace), and that innovative approaches are needed to understand the  
54  
55 influence of all relevant contextual factors.[18]  
56  
57  
58  
59  
60

1  
2  
3 The mixed results of studies of the effects of 12-hour versus 8-hour shifts in hospitals  
4 make it difficult for both employers and employees to make evidence-based decisions. In this  
5 study, we aimed to perform a thorough qualitative study, to understand nurses' experiences  
6 and perceptions of working 12-hour shifts compared with the usual 8-hour shifts. To our  
7 knowledge, no qualitative study has followed nurses working 12-hour shifts over a longer  
8 period. A qualitative longitudinal study may contribute to a better understanding of the mixed  
9 associations found in previous cross-sectional quantitative studies and may provide results  
10 with clearer policy implications.  
11  
12  
13  
14  
15  
16  
17  
18  
19

20 The aim of this study was to understand the nurses' individual experiences.  
21  
22  
23

## 24 **2. Methods**

### 25 *2.1. Macro setting*

26  
27  
28 In the Norwegian democratic welfare state, public authorities are responsible for  
29 providing and financing health services. The responsibility for specialist care lies with the  
30 state (administered by four regional health authorities). The four regions have a total of 39  
31 public hospitals and about 10 small private hospitals funded through contracts with the  
32 regional health authorities. The proportion of health professionals in the labour force is high  
33 in Norway compared with other high- and middle-income countries,[19] and the quality of  
34 health services is high.[20] The Conservative Party, in power since 2013, argued that long  
35 shifts in the health sector may be positive for both patients and employees. In 2015, changes  
36 to the Norwegian legislation on working hours in the health sector enabled employers and  
37 employees to implement long shifts without the approval of the National Labour Inspection  
38 Authority. Employers were now allowed to make deals with local unions permitting daily  
39  
40  
41  
42  
43  
44  
45  
46  
47  
48  
49  
50  
51  
52  
53  
54  
55  
56  
57  
58  
59  
60

1  
2  
3 work of up to 12.5 hours. Working hours is an important area of conflicts between the nurses'  
4  
5 union (NSF) and hospital employer organisation (SPEKTER) in recent years.  
6

7 The labour market in Norway is characterised by labour unions and collective  
8  
9 agreements. The labour market is regulated by the Norwegian Working Environment Act and  
10  
11 through agreements between labour unions and employer associations. Collective agreements  
12  
13 set rules for conditions such as salaries, working hours, pensions, and insurance. Union  
14  
15 membership is generally high; about 75% of all certified nurses in Norway were members of  
16  
17 the Norwegian Nurses Organisation in 2015.[21]  
18  
19  
20

## 21 *2.2. Micro setting*

22  
23

24 The hospital included in the study was a large university hospital in Norway. Two units  
25  
26 were included: one gastrointestinal surgery ward (non-ICU), and a highly specialised  
27  
28 newborn intensive care unit (ICU). The difference in the type of care was reflected in the  
29  
30 staff experience and education levels: the non-ICU had many young nurses who had not  
31  
32 completed any specialised training, and it had relatively high turnover; the ICU had more-  
33  
34 experienced staff, most of whom had a specialisation. There were no male nurses at either  
35  
36 unit. The non-ICU had ~60 nurses; the ICU, ~120 nurses. Most nurses at both units worked a  
37  
38 rotating three-shift schedule (day, evening, night), but some worked exclusively days or  
39  
40 evenings, and others only overnight shifts. Patients stayed from 1 day to several months in  
41  
42 both units.  
43  
44  
45

## 46 *2.3. Study design*

47  
48  
49

50 The trial was planned and conducted by the hospital while the qualitative study following  
51  
52 the trial was performed by external researchers and funded by the Norwegian Research  
53  
54 Council and the social partners.  
55  
56  
57

1  
2  
3 The qualitative study following the trial was planned together with managers and  
4 employees in the two units. The employees did not want to work 12-hour shifts on weekdays,  
5 because of concerns about patient treatment on the busier weekdays. The managers initially  
6 agreed to trial 12-hour shifts on weekends for 6 months, but this was extended to one year in  
7 both units. Only nurses were included in the study, not doctors or other personnel. Thirty  
8 nurses in the non-ICU and 12 in the ICU volunteered to try the 12-hour shifts, of whom 16  
9 and eight, respectively, chose to participate in the qualitative study. They all agreed to be  
10 interviewed once before the trial started, during the trial, and after the trial ended. Most of the  
11 individual interviews were conducted during a shift, but some interviews were difficult to  
12 organise within work hours and were conducted during the nurse's leisure time.  
13  
14  
15  
16  
17  
18  
19  
20  
21  
22  
23

#### 24 25 *2.4. Preparation* 26

27  
28 Before the two units started the trial, the managers and employees agreed on a shift  
29 system with certain number of rest breaks during the 12-hours shifts and that only two 12-  
30 hour shifts should be worked per weekend (Friday included a regular 8-hour shift) and that  
31 the nurses would have the day before and the day after the work weekend off. They decided  
32 that the 12-hours shift should include 90 minutes rest breaks. The non-ICU decided to have  
33 one break lasting one hour and then a 30-minute break while the ICU decided to have 3  
34 breaks each lasting 30 minutes.  
35  
36  
37  
38  
39  
40  
41  
42  
43

44 Participation was voluntary, and employees were formally informed about what  
45 participation implied in a meeting with the researchers. Nurses with a history of high sickness  
46 absence were excluded from the trial, as the managers were concerned that 12-hour shifts  
47 would be too demanding for them and pose a risk to the trial. A pre-trial meeting was also  
48 held in which the managers, union representatives, and researchers discussed the trial and  
49 study with representatives from the National Labour Inspection Authority.  
50  
51  
52  
53  
54  
55  
56  
57

1  
2  
3 The ICU started their trial period on 5 September 2015; the non-ICU, on 1 April 2016.  
4  
5

### 6 *2.5. Data collection*

7

8  
9 Three semi-structured interview guides were developed by the research team to cover the  
10 situations before, during, and after the trial. The pre-trial interviews lasted 1 to 1.5 hours, the  
11 in-trial interviews lasted ~1 hour, and the post-trial interviews lasted 30–40 minutes. All  
12 participants provided written consent at the pre-trial interview. Seventy interviews were  
13 conducted by three researchers, as two participants were lost to follow up due to job change.  
14  
15 The interviews were conducted in the Norwegian language.  
16  
17  
18  
19  
20  
21

22 The 18-month data collection period was August 2015 to January 2017.  
23  
24

### 25 *2.6. Emergent themes*

26

27  
28 Projects that involve many interviews produce a vast amount of data or text that is  
29 difficult to structure and analyse systematically. A 10-step method has been developed to  
30 code and structure all text using Microsoft Word and Excel.[22] Systematic manual coding  
31 ensures that all the content is coded, not just words or terms extracted from the text. In this  
32 study, 140 codes were used. Examples of codes are “work environment”, “organisation of  
33 rotation plans”, “experiences during the 12-hour shifts”, and “family consequences of 12-  
34 hour shifts”. The multidisciplinary team that conducted the interviews coded all interviews.  
35  
36 We developed the code list together at the beginning of the coding process, coded the same  
37 interviews, and revised the code list several times during the process. All transcribed  
38 interviews were fully coded (i.e., all transcribed text was assigned a code). In this study, we  
39 analysed data under the main heading of “12-hour shifts”. The remaining data provide  
40 information about the hospital and unit context. This information is not used explicitly in this  
41 study. Using the 10-step method, we identified the following main topics for the analysis:  
42  
43  
44  
45  
46  
47  
48  
49  
50  
51  
52  
53  
54  
55  
56 “pre-trial expectations of working 12-hour shifts on weekends”, “organising and  
57  
58  
59  
60

1  
2  
3 implementing the 12-hour shift schedule”, “consequences of working 12-hour shifts” (with  
4 subheadings “positive/negative effects during the shift”, “positive/negative effects during the  
5 off-shift periods”, “sleep”, “quality of treatment”, “health problems”, etc.), “decision after the  
6 end of the trial period”, and “individual overall assessment”. The results section is organised  
7 under these headings.  
8  
9  
10  
11  
12

### 13 14 *2.7. Patient and Public Involvement statement.*

15  
16  
17 This health services research study includes employed public hospital nurses. Both the  
18 employer organisation and the nurses' union were involved from the beginning of the project  
19 to the end.  
20  
21  
22  
23

### 24 25 *2.8. Ethics*

26  
27  
28 This study was approved by the Regional Committees for Medical and Health Research  
29 Ethics in Mid-Norway (REC) (reference number 2014/2017).  
30  
31  
32

## 33 34 **3. Results**

### 35 36 37 *3.1. Expectations before starting the 12-hour shifts*

38  
39  
40 All participants expressed their excitement about starting 12-hour shifts. Participants were  
41 asked, “What do you expect will happen when you start working 12-hour shifts on the  
42 weekends?” without any explicit cues. We have organised the answers into topics according  
43 to the how the responses were coded.  
44  
45  
46  
47

#### 48 49 **3.1.1. Not much difference from the current situation**

50  
51 Some of the nurses in both units thought it was difficult to have any expectations because  
52 the work load was generally unpredictable. Some periods were very busy, with many  
53  
54  
55  
56  
57

1  
2  
3 severely ill patients, whereas other periods were less busy. The nurses in the non-ICU thought  
4 that the long shifts might occur during peak periods, and some expressed concerns about this.  
5  
6

7  
8 *It can be very busy here, so it [working 12-hour shifts] will be difficult*  
9  
10 *because you do not have time to be tired during a busy day shift. At night,*  
11 *when you are tired because it's night time, a busy shift will be very tough*  
12  
13 *(Nurse 14, non-ICU, pre-trial interview).*  
14  
15

16  
17 Many of the nurses in the ICU were used to working double shifts, and they did not  
18 expect the 12-hour shifts to be more difficult.  
19

### 20 21 22 **3.1.2. More tired**

23 Most of the respondents expected to be more tired after a weekend working 12-hour shifts  
24 compared with a weekend working 8-hour shifts (i.e., 8 hours more than usual for a day-shift  
25 weekend):  
26  
27  
28

29  
30  
31 *I think I'll be very tired from working that weekend. It is good that we'll*  
32 *have the Monday after off, so we can get our strength back before starting*  
33 *the next shift (Nurse 13, non-ICU, pre-trial interview).*  
34  
35  
36

37  
38 When we asked whether they were tired after a regular 8-hour shift, they typically  
39 answered:  
40  
41

42  
43 *It varies a lot depending on my work tasks and the amount of pressure at*  
44 *the unit. But I'm tired at the end of a regular 8-hour shift if it's a busy day*  
45  
46 *(Nurse 2, ICU, pre-trial interview).*  
47  
48

49  
50 The participants in both units confirmed that they were exhausted after a busy shift.  
51  
52 However, most recovered well before the next shift, although problems obtaining sufficient  
53 sleep between an evening and morning shift were common.  
54  
55  
56

### 3.1.3. Nights

Some participants worked only nights. They typically expected that the 12-hour shifts would not be significantly different:

*The night shift is rather long already—it's 10 hours now. When I start doing 12-hour shifts, I will start at 7.45 pm instead of 9.30 pm. The difference is not that big, and I'll get to have a 1-hour break during the shift. I think it will be beneficial to start earlier in the evening (Nurse 10, non-ICU, pre-trial interview).*

Those working both day and night shifts during their 12-hour shift weekends shared this view about the nights.

### 3.1.4. Health concerns

Some respondents were not concerned about potential adverse health effects from working 12-hour shifts, not because they thought such shifts would be healthy, but rather because it was already difficult to work a rotating three-shift schedule. However, others did express concerns:

*I'm cursed with neck pain when I'm stressed. I'm wondering whether my back and neck will handle it [to work 12-hour shifts]. But as long as I get to take rest breaks during the shifts, I think I'll be fine (Nurse 10, non-ICU, pre-trial interview).*

### 3.1.5. Attitude and mental preparation

Several of the respondents argued that the experience would largely depend on their attitudes: “If you say to yourself that this is not going to work out well, it will not work out well”. Participants in both units felt this way, but this is also related to personality:



1  
2  
3 *I don't really have any specific concerns; I usually take things as they*  
4 *come. I'm thinking that this weekend will be about work and nothing else;*  
5 *it doesn't matter that there are some more hours (Nurse 16, non-ICU, pre-*  
6 *trial interview).*  
7  
8  
9  
10

11  
12 However, some ICU nurses were not convinced that the introduction of 12-hour shifts  
13  
14 would be that easy. They reflected on the need to prepare mentally for the long shift:  
15

16  
17 *I want to try working 12-hour shifts, but I am not sure because I haven't*  
18 *tried this before. Maybe I won't like it. But I think I'll have to be mentally*  
19 *prepared because on days when I usually finish at 3 pm, I will now have to*  
20 *work until 7.30 pm. (Nurse 1, ICU, pre-trial interview).*  
21  
22  
23  
24  
25

### 26 27 **3.1.6. Patient consequences**

28 The nurses in the ICU seemed to be more concerned than the nurses in the non-ICU about  
29  
30 potential adverse consequences for patients of nurses working longer shifts:  
31

32  
33 *I'm not sceptical...but I think we must find out whether 12-hour shifts will*  
34 *increase the probability of making mistakes. Will we be totally exhausted? -*  
35 *At the end of the shift, will we be unable to do anything? Will we be able to*  
36 *do the work tasks we are supposed to do? (Nurse 1, ICU, pre-trial*  
37 *interview)*  
38  
39  
40  
41  
42  
43  
44

45 The staff in the newborn ICU had strong focus on quality; for example, two colleagues  
46  
47 would always double-check medicine prescriptions (double-signing). They wondered  
48  
49 whether they might be too tired at the end of the 12-hour shifts to sustain quality:  
50

51  
52 *If you have a family making many demands or a newborn who needs*  
53 *constant monitoring, it will be demanding to work 12 hours with the same*  
54  
55  
56  
57

1  
2  
3 *patient and family. At the end of the shift, there might be a small risk of*  
4 *making mistakes; for instance, we might overlook that the infant's*  
5 *condition has worsened... (Nurse 6, ICU, pre-trial interview).*  
6  
7  
8  
9

### 10 **3.1.7. Effect on leisure and family life**

11  
12 Several of the respondents expressed concern about how the 12-hour shifts would affect  
13 their family life.

14  
15  
16  
17 *Well, I'll have to see how this works out with the rest of my life. It's not just*  
18 *that I'll be at work for more hours, it's that this must also fit my life outside*  
19 *work (Nurse 1, ICU, pre-trial interview).*  
20  
21  
22

23  
24 However, the criteria for selecting participants imply that most of the respondents had a  
25 family situation that allowed them to try the 12-hour shifts on weekends.

### 26 **3.1.8. Enthusiasm and resistance**

27  
28  
29 Some had great expectations about introducing the 12-hour shifts:

30  
31  
32  
33 *My expectations are first and foremost that 12-hour shifts will be*  
34 *introduced as a permanent arrangement and that this will lead to an*  
35 *improved quality of nursing both for the newborn patients and parents*  
36 *(Nurse 5, ICU, pre-trial interview).*  
37  
38  
39  
40  
41  
42

43 Others were indifferent. When we asked about the atmosphere at the units in relation to the  
44 12-hour shift trial, a typical answer was:

45  
46  
47  
48 *Well, some of the nurses are happy to try 12-hour shifts, but others do not*  
49 *want to. But I do not think there has been any strong protest against the*  
50 *trial (Nurse 10, non-ICU, pre-trial interview).*  
51  
52  
53  
54  
55  
56  
57

1  
2  
3 Those unwilling to try 12-hour shifts typically had small children. Their colleagues who  
4 chose to participate in the trial showed understanding:  
5  
6

7  
8 *It's easy to understand if they [nurses who do not want to try 12-hour*  
9 *shifts] have kids. Working a regular 8-hour shift allows you to see your*  
10 *kids before and after work, but this is different when working 12-hour*  
11 *shifts: they are in bed when you come home and still asleep when you leave*  
12 *for your next shift (Nurse 12, non-ICU, pre-trial interview).*  
13  
14  
15  
16  
17

### 18 19 20 3.2. Organising the 12-hour shift schedule 21

22  
23 The planning and organising of the 12-hour rotating shifts was not problematic in the  
24 non-ICU but was frustrating for those responsible for the rotation plans in the ICU. The ICU  
25 had eight nurses working 12-hour shifts on the weekends: four on day shifts and four on night  
26 shifts. In general, the rotation plans in the ICU unit were complicated. The unit divided all  
27 nurses into three groups, and every shift team within each group had to include the right  
28 formal competencies, and a specified mix of nurses with extensive experience and those with  
29 less experience. The planners had to consider adjustments because of the patient mix and for  
30 individual employees. For example, some nurses were insufficiently experienced to feel  
31 comfortable working alone with very sick infants. Others did not have the competencies to  
32 comfortably perform all the specialised roles and tasks that might be required of them during  
33 a shift, based on the skills mix of their on-shift colleagues. A willingness to adjust the  
34 schedule to accommodate individual employee preferences, together with meeting other  
35 competency and experience profile criteria for every shift, made planning a rotating roster a  
36 complex task. The addition to this complexity by having to include 12-hour shifts caused  
37 frustration for the planners. However, the trial period was extended by 6 months, and the  
38 planners said that planning the 12-hour shifts became easier as they gained experience.  
39  
40  
41  
42  
43  
44  
45  
46  
47  
48  
49  
50  
51  
52  
53  
54  
55  
56  
57

### 3.4. Consequences of working 12-hour shifts

#### 3.4.1. Taking rest breaks as planned

We asked participants whether they could take rest breaks as planned when they worked 12-hours instead of 8-hours shifts, and most of the respondents did not experience any difficulties.

*That went as planned. One weekend, my rest break was moved half an hour, but that was okay. It was right after an 8-hour shift started, and there were too few experienced nurses on duty, so I felt I couldn't take my break exactly when planned. But otherwise, I think we could all take the planned rests and pauses (Nurse 1, ICU, in-trial interview).*

The non-ICU had a room with a bed for the nurses' use, for napping and relaxing for 1 hour when working 12-hour shifts. Their experience with this was positive.

*That [the bed in a designated room] was very comfortable. Nobody called me on my phone and no one came into the room. The others respected this hour [for rest], and the threshold for knocking at that door was high (Nurse 1, non-ICU, in-trial interview).*

However, not all respondents had good experiences trying to nap during their shift:

*Well, I slept once or twice during my 1-hour break during the night shift. But when I woke up I was feeling queasy. I was very tired when I woke up and felt off-balance. So, I have stopped napping during the 12-hour night shift (Nurse 10, non-ICU, in-trial interview).*

We asked how she spent that hour during the following 12-hour night shifts afterwards. She answered:

1  
2  
3 *I can lie down for a little while, but I keep the lights on. I can listen to*  
4 *music or watch TV on my mobile (Nurse 10, non-ICU, in-trial interview).*  
5  
6  
7

8 Some created their own mix of activities during the 1-hour break at night:  
9

10  
11 *In my break during the night, first I sleep half an hour and then I watch a*  
12 *film or an episode from a TV show. The first few times, I slept for the whole*  
13 *hour, but I was unwell when I woke up, and I couldn't sleep when I got*  
14 *home. After I started with half an hour of sleep and half an hour watching*  
15 *something, I felt much better (Nurse 13, non-ICU, in-trial interview).*  
16  
17  
18  
19  
20  
21

22 Another nurse working in the non-ICU described her experience:  
23

24  
25 *I'm a bit queasy at first when I wake up, but I'm okay once I get on my feet.*  
26 *I think it is safer to have this nap because I have to drive home after the*  
27 *night shift (Nurse 11, non-ICU, in-trial interview).*  
28  
29  
30  
31

32 One of the respondents had a more determined approach to sleeping:  
33

34  
35 *Yes, I was able to get some sleep during both the day shifts and the night*  
36 *shifts. I have become quite good at power napping, and I had decided that I*  
37 *wanted to be good at that. I was not very good at it before, but now I can*  
38 *do it. I fall asleep quite simply now (Nurse 7, non-ICU, in-trial interview).*  
39  
40  
41  
42  
43  
44

45 Some of the nurses went outside during their break for fresh air, especially if the weather  
46 was pleasant. Others rested before their shift, saying that they did not need to sleep, but it still  
47 felt good to lie down and relax, and to think about something other than work.  
48  
49

50 However, working in a hospital entails a level of uncertainty, and many unplanned events  
51 during the shift can make it impossible to take the planned rest breaks.  
52  
53  
54  
55  
56  
57

1  
2  
3 *Last weekend, on the first night, I had two emergency patients who were*  
4 *very ill. There was much uncertainty about whether they had to be operated*  
5 *on during the night. In addition to these two, I had one uneasy patient and*  
6 *one mentally ill patient who needed constant monitoring. The night after, at*  
7 *1.30 am, the alarm sounded because a patient had a cardiac arrest, and we*  
8 *had to use the defibrillator and perform chest compressions. I think it took*  
9 *2.5 hours before we got the patient to the ICU. That weekend, I did not get*  
10 *my 1-hour rest break during any of the night shifts (Nurse 2, non-ICU, in-*  
11 *trial interview).*  
12  
13  
14  
15  
16  
17  
18  
19  
20  
21  
22

### 23 **3.4.2. Health consequences**

24 The nurses in the non-ICU discussed the health effects of working 12-hour shifts.  
25 Some of the nurses did not feel any difference compared with working 8-hour shifts, but  
26 they needed the day off after the work weekend to recover. Others described different  
27 negative experiences of working longer shifts than usual:  
28  
29  
30  
31  
32

33  
34 *At the end of the shift, I had a headache and my eyes were dry and sore*  
35 *from the dry air in the unit. I felt like I had been at work for a long time*  
36 *(Nurse 15, non-ICU, in-trial interview).*  
37  
38  
39  
40

41 Others mentioned health problems that may have been worsened by working long shifts:  
42  
43

44 *The night-shift weekends are very demanding, but fortunately, they only*  
45 *occur every 8 weeks. The weekends with the day shifts are okay, but I have*  
46 *back problems, and my back is sore after work weekends. Maybe I should*  
47 *not work in this way, but the carrot is, of course, that I get to work every*  
48 *fourth weekend instead of every third weekend (Nurse 11, non-ICU, in-trial*  
49 *interview).*  
50  
51  
52  
53  
54  
55  
56  
57

1  
2  
3 Most of the participants felt greater fatigue in their legs after a 12-hour shift, but some did  
4 not, despite the longer time spent standing and walking compared with an 8-hour shift. Most  
5 of the respondents described having a “tired head” after a 12-hour shift, but few reported any  
6 unexpected physical pain or health problems.  
7  
8  
9

10  
11  
12 *I think it has been okay, but I get a burning sensation under my feet, and*  
13 *feel tired. And, of course, at the end of the shift on the first weekend, I*  
14 *really hoped there would be no childbirth in the evening. You think such*  
15 *thoughts. (Nurse 6, ICU, in-trial interview).*  
16  
17  
18  
19

20  
21  
22 Another nurse had the opposite experience:

23  
24 *I worked 12-hour day shifts both Saturday and Sunday. It occurred to me*  
25 *that I can't remember the last time I wasn't exhausted after a shift. But this*  
26 *weekend, my legs were less tired than on a regular work weekend. I wasn't*  
27 *physically tired at all from working this weekend (Nurse 5, ICU, in-trial*  
28 *interview).*  
29  
30  
31  
32  
33  
34  
35

36  
37 Some of the participants found it more difficult to work 12-hour day shifts than 12-hour  
38 night shifts:  
39

40  
41 *The days are a bit longer than the nights. The difference between a 10-hour*  
42 *and 12-hour night shift is small, but the day... You need better shoes*  
43 *because your legs get tired (Nurse 3, ICU, in-trial interview).*  
44  
45  
46  
47

48  
49 The nurses in the non-ICU expressed uniform satisfaction with the opportunity to lie  
50 down during the 1-hour break:  
51

52  
53 *I do not feel more tired than usual. I feel the night shifts are very good, with*  
54 *the 1-hour rest break. It is almost the worst [to work] the night before*  
55  
56  
57

1  
2  
3 *Saturday, because then we work a regular night shift without the*  
4 *mandatory break. I almost look forward to the next night when I work 12*  
5 *hours and get to have a break for a whole hour (Nurse 13, non-ICU, in-*  
6 *trial interview).*  
7  
8  
9  
10

### 11 12 **3.4.3. Patient outcomes**

13  
14 None of the respondents admitted to making any mistakes during their 12-hour shifts, but  
15 they were not always sure:  
16

17  
18  
19 *I did not make any mistakes. But one thinks about it—after 11 hours, it*  
20 *could be easy to misread a graph, or something similar. Not that it has*  
21 *happened, but we are not as awake at the end of the shift as at the*  
22 *beginning (Nurse 2, non-ICU, in-trial interview).*  
23  
24  
25  
26  
27

28  
29 When asked about observed patient outcomes, some nurses said that they did not think  
30 patients noticed much difference. Some patients in the non-ICU had observed that some of  
31 the nurses were present for a long time, and had asked them about this. The nurses did not  
32 receive any negative reactions from the patients after explaining the trial, only positive  
33 responses. They also adjusted their rest break to their work tasks to minimise the  
34 consequences for the patients.  
35  
36  
37  
38  
39  
40

41  
42 *I take my rest break after I have finished distributing medication, pain*  
43 *relievers, and meals, so my patients don't often need to call for someone*  
44 *else during my break (Nurse 13, non-ICU, post-trial interview).*  
45  
46  
47  
48

### 49 **3.4.4. Family situation and friends**

50  
51 Most respondents felt that the most important positive consequence of working 12-hour  
52 shifts was only having to work every fourth weekend, instead of every third. They felt this  
53 was important because of their family situations.  
54  
55  
56  
57



1  
2  
3 *[Working] every fourth weekend instead of every third is very important to*  
4 *me, especially since my second child was born. It's okay to have time off*  
5 *during the weekdays, but this is not when my family has time off. So*  
6 *weekends off are very precious to me (Nurse 1, non-ICU, in-trial*  
7 *interview).*

8  
9  
10  
11  
12  
13  
14 Some nurses had asked their family explicitly what they thought about the 12-hour shifts:

15  
16  
17 *They are happy I'm home on more weekends. Whether I work a 12-hour or*  
18 *8-hour shift during the weekend does not matter to them. Maybe I sleep*  
19 *more during the regular work weekends, so the kids do not see me much on*  
20 *these weekends anyway (Nurse 11, non-ICU, in-trial interview).*

21  
22  
23  
24  
25  
26  
27 Individual family situations sometimes necessitated adjustments to the work schedule:

28  
29  
30 *I have my son every second weekend, and this is the only reason for me to*  
31 *work the 12-hour shifts every fourth instead of every third weekend (Nurse*  
32 *16, non-ICU, in-trial interview).*

33  
34  
35  
36  
37 Some of the nurses without children also valued the weekend more than weekdays for  
38 many reasons:

39  
40  
41  
42 *...none of my friends outside of work do shift-work, so for me, the weekends*  
43 *are sacred (Nurse 15, non-ICU, in-trial interview).*

44  
45  
46  
47 Family needs could be demanding for nurses with young children. For example:

48  
49  
50 *As a joke, I say that my job at the hospital is my second job, because my*  
51 *main job is at home. I have many things to keep track on at home, and*  
52 *when I have a work weekend, I still want to be with the kids. I feel bad*  
53  
54  
55  
56  
57

1  
2  
3 *about going to work, so when I get up in the morning, I must organise*  
4 *everything [my kids might need]. But when I work 12-hour shifts, I say to*  
5 *myself, “Okay this is my work weekend”, and then I concentrate on that*  
6 *and think about the fact that I have three weekends off afterwards when I*  
7 *can be with my children (Nurse 7, non-ICU, in-trial interview).*  
8  
9  
10  
11  
12  
13

14 All participants who were married noted that their husbands wanted them to work 12-  
15 hour shifts every fourth weekend instead of 8-hour shifts every third weekend.  
16  
17

18  
19 *My husband wants me to work the 12-hour shift weekends. He takes the*  
20 *kids to visit their grandparents on my work weekends and I have a quiet*  
21 *house. This is fine for them and for me (Nurse 13, non-ICU, in-trial*  
22 *interview).*  
23  
24  
25  
26  
27

28  
29 A more experienced nurse with adult children also noted that her husband liked this  
30 arrangement:  
31  
32

33  
34 *My husband thinks this is fine, because we can go to our holiday cabin on*  
35 *more weekends than before. And on my work weekend, he can go to the*  
36 *cabin alone, because all I do that weekend is work (Nurse 8, ICU, in-trial*  
37 *interview).*  
38  
39  
40  
41  
42

43 However, others felt they missed out at home when they worked a long shift on Saturday:  
44  
45

46 *It was wonderful to get home at 8 pm on Saturday night and have a nice*  
47 *meal and relax with my boyfriend. This gave me a bit more of a weekend*  
48 *feeling. Two or three hours of rest before going to bed was good. Now, I*  
49 *get home at 10.30 pm and feel I must rush to bed to get enough sleep before*  
50 *the next shift (Nurse 2, non-ICU, in-trial interview).*  
51  
52  
53  
54  
55  
56  
57

### 3.4.5. Tasks at work

Many of the participants experienced greater flexibility during the 12-hour shifts than the 8-hour shifts.

*The 12-hour night shifts have been terrific. I have a much better overview when I arrive at 8 pm and can start the evening round of medicines, start to get the antibiotics ready, organise the medicine for the next day, and so on. And I finish my round earlier compared with when we start working at 9.30 or 10 pm (Nurse 10, non-ICU, in-trial interview).*

The nurses also commented that they experienced fewer interruptions of work tasks during the 12-hour shifts:

*I noticed this at the time that would have been the regular shift change [had it been an 8-hour day], when we were in the middle of a procedure, on one of the days when I worked the 12-hour day shift. I was assisting a doctor with a lengthy procedure, and usually one gets a bit stressed at such times, because we have to finish the report and everything else before the next shift starts at 2.30 pm. And then I thought, “God, this is actually very good”, because I could relax and concentrate on what I was doing, and I took my time and calmly finished the procedure around 4 pm. Usually, I would have to hand over to the next nurse during the procedure and give a short oral report. We lose continuity this way, because the doctors are there the entire day. So I think it’s better for all [having 12-hour shifts]. I didn’t have a ticking clock at the back of my mind all day (Nurse 1, ICU, in-trial interview).*

1  
2  
3 This nurse also commented on the satisfying experience of completing jobs on her own,  
4  
5 rather than having to leave them to the next shift:

6  
7  
8 *And I feel that I get to do what I'm supposed to do on the days I work 12-*  
9  
10 *hour shifts. Instead of telling the next nurse what I have planned to do, I do*  
11  
12 *it myself. Because I can't be sure that the next nurse has the same priorities*  
13  
14 *and will do what I planned (Nurse 1, ICU, in-trial interview).*  
15

16  
17 Being present in the unit for a longer time may make the job easier because the nurses can  
18  
19 prepare and get to know patients better. During the trial period, the participants always  
20  
21 worked on the Friday before. Some noted that this prepared them better for the long shifts on  
22  
23 Saturday and Sunday because they knew what to expect, having learned more about the  
24  
25 patients in the ward.  
26

27  
28 Several participants also felt they could plan and structure a long shift better:  
29

30  
31 *The ward is usually busy, and I have had work weekends where I have been*  
32  
33 *very tired and have been very happy to go home at 3 pm. However, I have*  
34  
35 *not always been happy with my work, because too much was left for the*  
36  
37 *next shift [to finish]. Now I can plan better and complete all my tasks*  
38  
39 *(Nurse 9, non-ICU, in-trial interview).*  
40

41  
42  
43 Other nurses reported similar experiences:  
44

45  
46 *If you've promised the parents the infant will have a bath, you don't have*  
47  
48 *to stress and do it early in the day; you can plan to find a calmer period, to*  
49  
50 *have more time available for the task (Nurse 9, ICU, in-trial interview).*  
51

52  
53 Another nurse at the same unit had similar experiences working night shifts:  
54  
55

1  
2  
3 *I think I do the same as usual. However, I think I have more time to do my*  
4 *tasks. Nothing must be done right away because I'm going to be here until*  
5 *the next day (Nurse 4, ICU, in-trial interview)*  
6  
7  
8  
9

### 10 3.5. Decisions after the end of the trial period

11

12  
13 The manager at the ICU decided not to continue the 12-hour weekend shifts after the trial  
14 period, whereas the manager at the non-ICU decided to allow more nurses to try out this  
15 approach.  
16  
17

18  
19 For the nurses in the non-ICU, working fewer weekends and being able to provide a  
20 higher quality of care were the main reasons for continuing to work the 12-hour shifts. Some  
21 participants had not expected the 12-hour shifts to be successful in this very busy unit, but  
22 realised that they liked working longer shifts:  
23  
24  
25  
26  
27

28  
29 *I liked working 12-hour shifts very much. I was sceptical the first time I*  
30 *heard about it, but I wanted to try. I think they are suitable for me*  
31 *[because] I have good capacity to work, and think that when I'm at work, I*  
32 *like to work hard. I can tolerate this [way of working], but I have not been*  
33 *sick and I can handle the pressure quite well (Nurse 7, non-ICU, post-trial*  
34 *interview).*  
35  
36  
37  
38  
39  
40  
41  
42

43 The participants from the ICU reported mixed experiences at the end of the trial period.  
44 Some were unhappy about the decision not to implement 12-hour shifts as part of the regular  
45 schedule once the trial period was finished. They argued that this decision was only made  
46 because the schedule planners found it difficult to implement 12-hour shift schedules. When  
47 one participant was asked whether the scheduling process could be made easier if the unit  
48 were organised differently, she replied:  
49  
50  
51  
52  
53  
54  
55  
56  
57

1  
2  
3 *Yes, without doubt. If we were divided into two groups instead of three it*  
4 *would be much easier to make up the shift plans. We would have more*  
5 *people to choose from and that would give more flexibility (Nurse 7, ICU,*  
6 *post-trial interview).*  
7  
8  
9  
10

11  
12 Another nurse in the ICU also wanted the 12-hour shifts to be continued, and shared the  
13 following experience after the trial ended.  
14  
15

16  
17 *Now I see a lot of work weekends on my shift plan. I experienced a*  
18 *significant difference between working every fourth and every third*  
19 *weekend. Now, there are more conflicts with other things that happen*  
20 *outside work. I did not experience this to the same extent when I worked*  
21 *every fourth weekend (Nurse 1, ICU, post-trial interview).*  
22  
23  
24  
25  
26  
27

28  
29 Others were indifferent about the decision not to continue the 12-hour shifts:  
30

31  
32 *I haven't really engaged in this discussion; I just noticed that they didn't*  
33 *want to continue. My first thought was that it [the decision] sucked, but*  
34 *then I decided to focus my energy on doing my job instead (Nurse 5, ICU,*  
35 *post-trial interview).*  
36  
37  
38  
39  
40

41 A small group of nurses had decided not to continue with the 12-hour shifts before  
42 management decided not to continue. Not all nurses shared a clear preference for avoiding  
43 working on weekends:  
44  
45  
46

47  
48 *Well, I don't have small children. For some, the 12-hour shifts are better—*  
49 *for instance, those only working night shifts and those who have to*  
50 *commute longer distances (Nurse 4, ICU, post-trial interview).*  
51  
52  
53  
54  
55  
56  
57

1  
2  
3 *Well, it is good to have an extra weekend off, but I must work much more*  
4 *during the weekdays Monday to Friday. That's what everybody else does.*  
5  
6  
7 *But I'm happy working shifts with more time off on weekdays (Nurse 2,*  
8  
9 *ICU, post-trial interview).*  
10

11  
12 Some ICU nurses who had been sceptical before the trial had positive experiences and  
13 wanted to continue. Others who had been positive before the trial did not want to continue  
14 working 12-hour shifts after the trial. This indicates that it may be difficult for nurses to  
15 anticipate their own preferences for shift lengths accurately, before trying them in practice.  
16  
17  
18  
19  
20

#### 21 22 **4. Discussion** 23

24  
25 This qualitative longitudinal study followed nurses for 18 months before, during, and  
26 after they trialled working 12-hour shifts on weekends for 1 year. Their participation in the  
27 12-hour shift work was completely voluntary, and only those motivated to work the 12-hour  
28 shifts participated. The aim of the study was to understand the nurses' individual experiences.  
29  
30  
31  
32  
33  
34  
35  
36  
37  
38  
39  
40  
41  
42  
43  
44  
45  
46  
47  
48  
49  
50  
51  
52  
53  
54  
55  
56  
57  
58  
59  
60  
Their perceptions give insight into the potential consequences of any future reform to  
increase the standard shift length for hospital nurses from 8 hours to 12 hours. In the  
following sections, we discuss the themes that emerged from this research: job satisfaction,  
health effects, effects on sleep, patient safety, and employee safety.

We asked all respondents how they perceived their work environment and all  
participating nurses had favourable perceptions of their work environment. This may be an  
important condition for implementing new shift arrangements. The ICU was reorganised  
when the trial period started, and all nurses were divided into three groups with different  
tasks. During the interviews, it appeared that not all employees were satisfied with the new  
organisation of the unit. Their main argument against the reorganisation was that they had

1  
2  
3 each ended up with a narrower spectrum of work tasks than desired. Such changes may have  
4  
5 negative impact especially on job satisfaction.  
6  
7

#### 8 *4.1. Job satisfaction*

9

10  
11 Job satisfaction was high overall among the participants. In the non-ICU, the nurses were  
12  
13 generally happy that the use of 12-hour shifts would continue, and more nurses wanted to try  
14  
15 the extended shifts. In the ICU, the nurses had mixed reactions to the managers' decision not  
16  
17 to continue the 12-hour shifts. Some thought this was a poor decision; others were indifferent  
18  
19 or supportive. Overall job satisfaction at the units does not appear to have been affected by  
20  
21 the 12-hour shifts. However, different preferences may affect the nurses' ongoing job  
22  
23 satisfaction at the individual level. This is consistent with the findings of Kundi et al.  
24  
25 (1995),[9] who found similar levels of job satisfaction between 8-hour shift workers and 12-  
26  
27 hour shift workers. In our study, only volunteers were included, and no one was forced to  
28  
29 work the extended shift against their will. This study therefore cannot rule out the possibility  
30  
31 of negative consequences on job satisfaction if nurses are forced to work longer shifts, rather  
32  
33 than volunteering.  
34  
35  
36  
37

#### 38 *4.2. Health effects*

39  
40

41 Because participation was voluntary, and the same nurses were followed for 18 months,  
42  
43 this study was able to probe factors behind the stress and burnout reported in the  
44  
45 literature.[2,3,4] Because the 12-hour shift was implemented only on weekends, we expected  
46  
47 to see less significant effects on health and wellbeing among the participating nurses  
48  
49 compared with those working 12-hour shifts throughout the week in other studies. Most of  
50  
51 the participants in our study experienced a greater physical and mental workload during 12-  
52  
53 hour shifts compared with 8-hour shifts. This was mainly because of the longer time spent  
54  
55 walking and standing, and being exposed to the dry air in the units. A recovery period was  
56  
57  
58  
59  
60



1  
2  
3 needed after a 12-hour shift weekend. The nurses commented that pre-existing health  
4  
5 problems might be worsened by working long shifts. Some had health concerns before they  
6  
7 started the trial, but still felt that there were advantages of working every fourth instead of  
8  
9 every third weekend and wished to continue. It is possible that these nurses overlooked or  
10  
11 underreported negative health consequences of the longer shifts. We suggest that negative  
12  
13 health effects of 12-hours shifts will be significant if employees with health problems are  
14  
15 forced to work longer shifts than they can tolerate given their health status.  
16  
17

#### 18 19 *4.3. Effects on sleep*

20  
21  
22 The literature shows that nurses accrue considerable sleep debt while working successive  
23  
24 12-hour shifts, with accompanying fatigue and sleepiness, and that some nurses are more  
25  
26 severely affected by sleep loss than others, as measured by attention lapses.[6] In this study,  
27  
28 the 12-hour shifts were worked only on weekends and were voluntary, and the effect on sleep  
29  
30 was expected to be slight. We find that those who reported sleeping problems in the pre-trial  
31  
32 interviews had the same sleeping problems when they were working 12-hour shifts. None of  
33  
34 the participants reported having sleep problems from starting to work 12-hour shifts.  
35  
36 However, we cannot rule out the possibility that the nurses who self-selected to participate  
37  
38 were less susceptible to sleep problems than those who opted out. However, of the 24  
39  
40 participants, many reported sleeping problems in the pre-trial interviews, so the opposite may  
41  
42 also be the case. We suggest that the observed variation in individual sleep quality gives an  
43  
44 important argument for hospital owners to offer the nurses and other employee different  
45  
46 choices of working hour agreements.  
47  
48  
49

#### 50 51 *4.4. Patient safety*

52  
53  
54 There is some evidence that longer work hours for hospital staff can increase the risk of  
55  
56 errors and hospital-associated infection among patients.[11,14] However, a systematic  
57

1  
2  
3 literature review concluded that more evidence is needed to conclude whether there is a  
4 causal relationship between long work hours and adverse patient outcomes.[15] In this study,  
5 all participants acknowledged that the risk of mistakes was higher at the end than at the  
6 beginning of a shift. However, none of the nurses reported making mistakes during the trial  
7 period.  
8  
9  
10  
11  
12

13 One finding that is rarely reported in the literature is a positive effect on patients and the  
14 quality of care from longer nurse work hours—yet this was reported by our participants. Most  
15 felt they had more time to complete their tasks, and the opportunity to follow their patients  
16 for longer during each shift.  
17  
18  
19  
20  
21

22 We did not interview the doctors, and we do not know whether this trial had any effects  
23 on them. However, it is plausible the doctors benefited from having fewer disruptions during  
24 procedures for hand-overs between the nurses working different shifts, and from having  
25 fewer nurses to communicate with during the day.  
26  
27  
28  
29  
30

31 The 12-hour night shifts were perceived to work well in this trial, especially in the non-  
32 ICU, where nurses had their own room with a bed for resting. A recent study reported that  
33 12-hour night shift workers exhibit more performance variability and subjective sleepiness  
34 than day workers, and suggests that workplace napping may be considered.[13] We find that  
35 the 1-hour rest break available to the nurses working 12-hour night shift in our study, was  
36 very appreciated by the nurses. The 1-hour break was used in various ways by the nurses, and  
37 most satisfaction was expressed by those who had access to a designated room with a bed  
38 where they could lay down in their 1-hour rest break during the night shift. This arrangement  
39 may have contributed to the lower level of sleepiness and performance variability self-  
40 reported by nurses in our study.  
41  
42  
43  
44  
45  
46  
47  
48  
49  
50  
51

52 Turning to the long duration of night shifts in this study, the participating nurses had  
53 positive experiences with the 12-hour night shifts overall. Several factors may account for  
54  
55  
56  
57  
58  
59  
60

1  
2  
3 this. Notably, all participants in the medical unit felt that having a bed in a designated staff  
4 room for rest breaks during the long night shifts was an advantage. This may be an effective  
5 method for reducing the increased risk of accidents in long shifts reported in the  
6 literature.[16]  
7  
8  
9  
10

#### 11 12 *4.5. Employee safety* 13

14  
15 Shift work generally, and night shifts and long shifts in particular, are frequently  
16 associated with adverse effects on employees. However, this study found mixed views on the  
17 employee safety implications of longer (12-hour) shifts, including for the night shifts.  
18  
19

20  
21 On one hand, the managers of both units argued that “pure” night shift workers became  
22 an isolated group, whom the managers never met and who did not receive the professional  
23 updates received by nurses working days and evenings. They therefore wanted the night  
24 shifts to be spread among more nurses, and had reduced the size of the designated pure night  
25 team, i.e., the nurses working night shifts exclusively.  
26  
27  
28  
29  
30  
31

32  
33 On the other hand, this change was not preferred by most of the nurses—regardless of  
34 whether they wanted to work primarily nights or did not handle night work well. The  
35 literature suggests a possible explanation. Wagstaff and Lie (2011)[16] concluded that pure  
36 night work may provide some protection against the negative health effects often reported  
37 from intermittent night shift work, by allowing resynchronisation. Therefore, there may be  
38 good arguments for reintroducing pure night shift teams. Moreover, if night shifts are 12  
39 hours long, the alienation mentioned by managers may be reduced, because the night shift  
40 nurses arrive earlier in the evenings to start their shift and therefore participate in some of the  
41 same activities as nurses working the evening shift. On the other hand, some nurses did not  
42 want to change from a two-shift system to a three-shift system. This may be explained in part  
43  
44  
45  
46  
47  
48  
49  
50  
51  
52  
53  
54  
55  
56  
57  
58  
59  
60

1  
2  
3 by a recent study of combined in-field and laboratory experiments that concluded that chronic  
4  
5 shift work causes night shift intolerance.[23]  
6  
7

### 8 *An overall evaluation* 9

10  
11 We agree with Ferguson and Dawson (2012),[18] who concluded that there is no simple  
12  
13 “yes or no” answer to the choice between 12-hour versus 8-hour shifts. They argued that the  
14  
15 answer depends on the context, including the work tasks, workforce, and workplace.  
16  
17 However, we wish to add another dimension: individual preferences.  
18

19  
20 Individual nurses’ preferences are heterogeneous even within the same unit. It is not easy  
21  
22 to obtain a clear picture of the diversity of preferences using quantitative methods. Moreover,  
23  
24 a given individual’s preference will change over time as her or his family and health situation  
25  
26 evolves, and depending on the situation at work. Therefore, no universal decision about shift  
27  
28 length preferences is possible; rather, continuous dynamic assessment of the most suitable  
29  
30 shift length and rotation scheme for each employee is needed, if the aim is to reduce the  
31  
32 adverse outcomes of shift work.  
33

34  
35 The scoping review by Harris et al. (2015)[24] suggests that there may always be  
36  
37 insufficient evidence to justify either the widespread implementation or the withdrawal of 12-  
38  
39 hour shifts for nurses. They concluded that the real benefits, and whether there are real and  
40  
41 unacceptable risks to patients and staff, are unknown. They also noted that more research is  
42  
43 needed to understand the long-term effects, as opposed to more easily measured short-term  
44  
45 effects.  
46

47  
48 We suggest that the mixed results in previous studies reflect the fact that there is simply  
49  
50 no universally correct answer to this question, because of the differences in context but also  
51  
52 the heterogeneity and dynamic nature of individual preferences and tolerance. We argue that  
53  
54 the observed diversity of expectations and experiences, and the strength of different nurses’  
55  
56  
57  
58  
59  
60

1  
2  
3 contrasting preferences about long shifts, indicate that 12-hour shifts should be completely  
4  
5 voluntary, rather than being either mandated or banned as a universal policy.  
6  
7

## 8 **5. Strengths and limitations**

9

10  
11 A key strength of this study is its longitudinal design. The nurses trialled 12-hour shifts  
12  
13 for 1 year, and their perspectives were obtained over an 18-month period that captured the  
14  
15 nurses' views before, during, and after the intervention. Another strength is the richness and  
16  
17 authenticity of individual experiences that can be revealed by a qualitative methodology  
18  
19 based on a relatively unstructured interview format.  
20  
21

22 A key limitation is the small sample size of 24 nurses. However, given that our qualitative  
23  
24 research design based on interviews was unsuitable for very large sample sizes, a more  
25  
26 important limitation is that we excluded nurses who did not wish to trial the 12-hour shifts. It  
27  
28 is possible this study underestimates the risk of adverse outcomes from 12-hour shifts, as  
29  
30 nurses who knew they would be susceptible to such outcomes likely chose not to participate.  
31  
32 This aspect of the study design was determined by ethical considerations: as it would be  
33  
34 highly unethical to force someone to work 12-hour shifts against their will, a requirement for  
35  
36 study approval was that the 12-hour shifts would be voluntary. Additionally, we suspect that  
37  
38 negative health consequences of working 12-hour shifts were underreported by the  
39  
40 participants, as many wanted the trial to succeed so they could work only every fourth  
41  
42 weekend instead of every third weekend.  
43  
44  
45  
46

## 47 **6. Conclusion**

48

49  
50 This study revealed the diversity of nurses' preferences for working 12-hour shifts. While  
51  
52 the experience of working 12-hour shifts was positive for most of the participating nurses in  
53  
54 our study, it was not universally preferred. We suggest that individual preference for working  
55  
56  
57  
58  
59  
60

1  
2  
3 12-hour shifts is a function of own health situation, family situation, work load tolerance,  
4  
5 degree of sleep problems, personality and other factors.  
6

7 Based on these findings, we recommend that working 12-hour shifts in public hospitals  
8  
9 should be voluntary. Pushing nurses into working long shifts against their will could  
10  
11 negatively affect their health, job satisfaction, and general life quality, and drive them away  
12  
13 from the profession.  
14

15  
16  
17 a. Contributorship statement

18 SOO and HF conceived and planned the project. SOO, MST and SLK conducted the  
19  
20 interviews and HF helped supervise the project. HF, MTS, SLK and SOO coded the  
21  
22 interviews, and SOO drafted the manuscript. All authors discussed the results and contributed  
23  
24 to the final manuscript.  
25  
26

27  
28  
29 b. Competing interests

30  
31 The authors declare that they have no conflict of interest.  
32  
33

34  
35 c. Funding

36  
37 This project was funded mainly by the Research Council of Norway. The main hospital  
38  
39 employer organisation (SPEKTER), the nurses' union (NSF), and the nursing assistants'  
40  
41 union (Fagforbundet) financed the same yearly amount covering in total one-fifth of the  
42  
43 project's total cost. None of the funding bodies read the manuscript or had any influence on  
44  
45 the results.  
46  
47

48  
49  
50 d. Data sharing statement  
51  
52  
53  
54  
55  
56  
57

1  
2  
3 All interviews were recorded and converted to text files. The text files are in Norwegian and  
4  
5 can be made available upon request. Written informed consent was obtained from all  
6  
7 participants.  
8  
9

## 10 **References**

- 13 1. Admi, H., Tzischinsky, O., Epstein, R., Herer, P., Lavie, P. 2008. Shift work in  
14 nursing: is it really a risk factor for nurses' health and patients' safety? *Nurs. Econ.*  
15 26, 250–257.  
16  
17
- 18 2. Dall'Ora, C., Griffiths, P., Ball, J., Simon, M., H Aiken, L.H. 2015. Association of  
19 12-h shifts and nurses' job satisfaction, burnout and intention to leave: findings from a  
20 cross-sectional study of 12 European countries. *BMJ Open* 5, e008331. doi:  
21 10.1136/bmjopen-2015-008331.  
22  
23
- 24 3. Iskera-golec, I., Folkard, S., Marek, T., Noworol, C. 1996. Health, well-being and  
25 burnout of ICU nurses on 12-and 8-h shifts. *Work Stress* 10, 251–256.  
26  
27
- 28 4. Chen, J., Davis, K.G., Daraiseh, N.M., Pan, W., Davis, L.S. 2014. Fatigue and  
29 recovery in 12-hour dayshift hospital nurses. *J. Nurs. Manag.* 22, 593–603.  
30  
31
- 32 5. Hoffman, A.J., Scott, L.D. 2003. Role stress and career satisfaction among registered  
33 nurses by work shift patterns. *J. Nurs. Adm.* 33, 337–342.  
34  
35
- 36 6. Geiger-Brown, J., Rogers, V.E., Trinkoff, A.M., Kane, R.L., Bausell, R.B., Scharf,  
37 S.M. 2012. Sleep, sleepiness, fatigue, and performance of 12-hour-shift nurses.  
38 *Chronobiol. Int.* 29, 211–219.  
39  
40
- 41 7. Banakhar, M. 2017. The impact of 12-hour shifts on nurses' health, wellbeing, and  
42 job satisfaction: A systematic review. *J. Nurs. Educ. Pract.* 7, 69.  
43  
44
- 45 8. Todd, C., Robinson, G., Reid, N. 1993. 12-hour shifts: job satisfaction of nurses. *J.*  
46 *Nurs. Manag.* 1, 215–220.  
47  
48  
49  
50  
51  
52  
53  
54  
55  
56  
57

- 1  
2  
3 9. Kundi, M., Koller, M., Stefan, H., Lehner, L., Kainldsdorfer, S., Rottenbacher, S.  
4  
5 1995. Attitudes of nurses towards 8-h and 12-h shift systems. *Work Stress* 9, 134–  
6  
7 139.
- 8  
9 10. Stone, P.W., Du, Y., Cowell, R., Amsterdam, N., Helfrich, T.A., Linn, R.W.,  
10  
11 Gladstein, A., Walsh, M., Mojica, L.A. 2006. Comparison of nurse, system and  
12  
13 quality patient care outcomes in 8-hour and 12-hour shifts. *Med. Care* 44, 1099–1106.
- 14  
15 11. Scott, L.D., Rogers, A.E., Hwang, W.-T., Zhang, Y. 2006. Effects of critical care  
16  
17 nurses' work hours on vigilance and patients' safety. *Am. J. Crit. Care* 15, 30–37.
- 18  
19 12. Han, K., Trinkoff, A.M., Geiger-Brown, J. 2014. Factors associated with work-related  
20  
21 fatigue and recovery in hospital nurses working 12-hour shifts. *Workplace Health Saf.*  
22  
23 62, 409–414.
- 24  
25 13. Wilson, M., Permito, R., English, A., Albritton, S., Coogle, C., Van Dongen, H.P.A.  
26  
27 2017. Performance and sleepiness in nurses working 12-h day shifts or night shifts in  
28  
29 a community hospital. *Accid. Anal. Prev.*
- 30  
31 14. Virtanen, M., Kurvinen, T., Terho, K., Oksanen, T., Peltonen, R., Vahtera, J.,  
32  
33 Routamaa, M., Elovainio, M., M. Kivimaki, M. 2009. Work hours, work stress, and  
34  
35 collaboration among ward staff in relation to risk of hospital-associated infection  
36  
37 among patients. *Med. Care* 47, 310–318.
- 38  
39 15. Bae, S.-H., Fabry, D. 2014. Assessing the relationships between nurse work  
40  
41 hours/overtime and nurse and patient outcomes: systematic literature review. *Nurs.*  
42  
43 *Outlook* 62, 138–156.
- 44  
45 16. Wagstaff, A.S., Lie, J.-A.S. 2011. Shift and night work and long working hours-a  
46  
47 systematic review of safety implications. *Scand. J. Work Environ. Health* 37, 173–  
48  
49 185.
- 50  
51  
52  
53  
54  
55  
56  
57  
58  
59  
60



- 1  
2  
3 17. Estabrooks, C.A., Cummings, G.G., Olivo, S.A., Squires, J.E., Giblin, C., Simpson,  
4  
5 N. 2009. Effects of shift length on quality of patient care and health provider  
6  
7 outcomes: systematic review. *Qual. Saf. Health Care* 18, 181–188.  
8  
9  
10 18. Ferguson, S.A., Dawson, D. 2012. 12-h or 8-h shifts? It depends. *Sleep Med. Rev.* 16,  
11  
12 519–528.  
13  
14 19. Gupta, N., Diallo, K., Zurn P., Dal Poz, M.R. 2003. Assessing human resources for  
15  
16 health: what can be learned from labour force surveys? *Hum. Resour. Health* 1, 5.  
17  
18 20. OECD. 2014. *OECD Reviews of Health Care Quality: Norway 2014*. OECD  
19  
20 Publishing, Paris.  
21  
22 21. Bergene, A.C., Egeland, C. 2016. Interventionism as a union strategy? The strategies  
23  
24 of the Norwegian Nurses Organisation in relation to temporary agency work. *Transfer*  
25  
26 *Eur. Rev. Labour Res.* 22, 521–534. doi: 10.1177/1024258916667027.  
27  
28  
29 22. Ose, S.O. 2016. Using Excel and Word to structure qualitative data. *J. Appl. Soc. Sci.*  
30  
31 10, 147–162.  
32  
33 23. Li, P., Morris, C.J., Patxot, M., Yugay, T., Mistretta, J., Purvis, T.E., Scheer, F.A.J.L.,  
34  
35 Hu, K. 2017. Reduced tolerance to night shift in chronic shift workers: insight from  
36  
37 fractal regulation. *Sleep* 40, 1 July 2017. doi: 10.1093/sleep/zsx092.  
38  
39  
40 24. Harris, R., Sims, S., Parr, J., Davies, N. 2015. Impact of 12-hour shift patterns in  
41  
42 nursing: a scoping review. *Int. J. Nurs. Stud.* 52, 605–634.  
43  
44  
45  
46  
47  
48  
49  
50  
51  
52  
53  
54  
55  
56  
57  
58  
59  
60

## Standards for Reporting Qualitative Research (SRQR)\*

<http://www.equator-network.org/reporting-guidelines/srqr/>

Page/line no(s).

### Title and abstract

|                                                                                                                                                                                                                                                              |                |
|--------------------------------------------------------------------------------------------------------------------------------------------------------------------------------------------------------------------------------------------------------------|----------------|
| <p><b>Title</b> - Concise description of the nature and topic of the study Identifying the study as qualitative or indicating the approach (e.g., ethnography, grounded theory) or data collection methods (e.g., interview, focus group) is recommended</p> | 1/ 1-3         |
| <p><b>Abstract</b> - Summary of key elements of the study using the abstract format of the intended publication; typically includes background, purpose, methods, results, and conclusions</p>                                                               | 2/1-25 & 3/1-2 |

### Introduction

|                                                                                                                                                                     |        |
|---------------------------------------------------------------------------------------------------------------------------------------------------------------------|--------|
| <p><b>Problem formulation</b> - Description and significance of the problem/phenomenon studied; review of relevant theory and empirical work; problem statement</p> | 7/8-15 |
| <p><b>Purpose or research question</b> - Purpose of the study and specific objectives or questions</p>                                                              | 7/16   |

### Methods

|                                                                                                                                                                                                                                                                                                                                                                                                             |                 |
|-------------------------------------------------------------------------------------------------------------------------------------------------------------------------------------------------------------------------------------------------------------------------------------------------------------------------------------------------------------------------------------------------------------|-----------------|
| <p><b>Qualitative approach and research paradigm</b> - Qualitative approach (e.g., ethnography, grounded theory, case study, phenomenology, narrative research) and guiding theory if appropriate; identifying the research paradigm (e.g., postpositivist, constructivist/ interpretivist) is also recommended; rationale**</p>                                                                            | 11/2-20         |
| <p><b>Researcher characteristics and reflexivity</b> - Researchers' characteristics that may influence the research, including personal attributes, qualifications/experience, relationship with participants, assumptions, and/or presuppositions; potential or actual interaction between researchers' characteristics and the research questions, approach, methods, results, and/or transferability</p> | 11/8-20         |
| <p><b>Context</b> - Setting/site and salient contextual factors; rationale**</p>                                                                                                                                                                                                                                                                                                                            | 8/2-22 & 9/2-11 |
| <p><b>Sampling strategy</b> - How and why research participants, documents, or events were selected; criteria for deciding when no further sampling was necessary (e.g., sampling saturation); rationale**</p>                                                                                                                                                                                              | 9/13-23         |
| <p><b>Ethical issues pertaining to human subjects</b> - Documentation of approval by an appropriate ethics review board and participant consent, or explanation for lack thereof; other confidentiality and data security issues</p>                                                                                                                                                                        | 12/1-2          |
| <p><b>Data collection methods</b> - Types of data collected; details of data collection procedures including (as appropriate) start and stop dates of data collection and analysis, iterative process, triangulation of sources/methods, and modification of procedures in response to evolving study findings; rationale**</p>                                                                             | 10/16-22        |

|                       |                                                                                                                                                                                                                                                       |          |
|-----------------------|-------------------------------------------------------------------------------------------------------------------------------------------------------------------------------------------------------------------------------------------------------|----------|
| 1<br>2<br>3<br>4<br>5 | <b>Data collection instruments and technologies</b> - Description of instruments (e.g., interview guides, questionnaires) and devices (e.g., audio recorders) used for data collection; if/how the instrument(s) changed over the course of the study | 10/16-17 |
| 6<br>7<br>8           | <b>Units of study</b> - Number and relevant characteristics of participants, documents, or events included in the study; level of participation (could be reported in results)                                                                        | 10/16-22 |
| 9<br>10<br>11<br>12   | <b>Data processing</b> - Methods for processing data prior to and during analysis, including transcription, data entry, data management and security, verification of data integrity, data coding, and anonymization/de-identification of excerpts    | 11/2-20  |
| 13<br>14<br>15<br>16  | <b>Data analysis</b> - Process by which inferences, themes, etc., were identified and developed, including the researchers involved in data analysis; usually references a specific paradigm or approach; rationale**                                 | 11/2-20  |
| 17<br>18<br>19<br>20  | <b>Techniques to enhance trustworthiness</b> - Techniques to enhance trustworthiness and credibility of data analysis (e.g., member checking, audit trail, triangulation); rationale**                                                                | 11/2-20  |

### Results/findings

|                            |                                                                                                                                                                                                   |                                               |
|----------------------------|---------------------------------------------------------------------------------------------------------------------------------------------------------------------------------------------------|-----------------------------------------------|
| 23<br>24<br>25<br>26       | <b>Synthesis and interpretation</b> - Main findings (e.g., interpretations, inferences, and themes); might include development of a theory or model, or integration with prior research or theory | Not relevant in this study                    |
| 27<br>28<br>29<br>30<br>31 | <b>Links to empirical data</b> - Evidence (e.g., quotes, field notes, text excerpts, photographs) to substantiate analytic findings                                                               | Quotes used extensively in the result chapter |

### Discussion

|                                        |                                                                                                                                                                                                                                                                                                                                                                                                             |          |
|----------------------------------------|-------------------------------------------------------------------------------------------------------------------------------------------------------------------------------------------------------------------------------------------------------------------------------------------------------------------------------------------------------------------------------------------------------------|----------|
| 34<br>35<br>36<br>37<br>38<br>39<br>40 | <b>Integration with prior work, implications, transferability, and contribution(s) to the field</b> - Short summary of main findings; explanation of how findings and conclusions connect to, support, elaborate on, or challenge conclusions of earlier scholarship; discussion of scope of application/generalizability; identification of unique contribution(s) to scholarship in a discipline or field | 34/22-24 |
| 41                                     | <b>Limitations</b> - Trustworthiness and limitations of findings                                                                                                                                                                                                                                                                                                                                            | 35/3-13  |

### Other

|                |                                                                                                                                               |         |
|----------------|-----------------------------------------------------------------------------------------------------------------------------------------------|---------|
| 44<br>45<br>46 | <b>Conflicts of interest</b> - Potential sources of influence or perceived influence on study conduct and conclusions; how these were managed | 36/5-6  |
| 47<br>48       | <b>Funding</b> - Sources of funding and other support; role of funders in data collection, interpretation, and reporting                      | 36/8-13 |

\*The authors created the SRQR by searching the literature to identify guidelines, reporting standards, and critical appraisal criteria for qualitative research; reviewing the reference lists of retrieved sources; and contacting experts to gain feedback. The SRQR aims to improve the transparency of all aspects of qualitative research by providing clear standards for reporting qualitative research.

1  
2  
3  
4  
5  
6  
7  
8  
9  
10  
11  
12  
13  
14  
15  
16  
17  
18  
19  
20  
21  
22  
23  
24  
25  
26  
27  
28  
29  
30  
31  
32  
33  
34  
35  
36  
37  
38  
39  
40  
41  
42  
43  
44  
45  
46  
47  
48  
49  
50  
51  
52  
53  
54  
55  
56  
57  
58  
59  
60

\*\*The rationale should briefly discuss the justification for choosing that theory, approach, method, or technique rather than other options available, the assumptions and limitations implicit in those choices, and how those choices influence study conclusions and transferability. As appropriate, the rationale for several items might be discussed together.

**Reference:**

O'Brien BC, Harris IB, Beckman TJ, Reed DA, Cook DA. **Standards for reporting qualitative research: a synthesis of recommendations.** *Academic Medicine*, Vol. 89, No. 9 / Sept 2014  
DOI: 10.1097/ACM.0000000000000388

For peer review only

# BMJ Open

## One-year trial of 12-hour shifts in a non-intensive care unit and an intensive care unit in a public hospital: A qualitative study of 24 nurses' experiences

|                                 |                                                                                                                          |
|---------------------------------|--------------------------------------------------------------------------------------------------------------------------|
| Journal:                        | <i>BMJ Open</i>                                                                                                          |
| Manuscript ID                   | bmjopen-2018-024292.R2                                                                                                   |
| Article Type:                   | Research                                                                                                                 |
| Date Submitted by the Author:   | 18-Dec-2018                                                                                                              |
| Complete List of Authors:       | Ose, Solveig Osborg; SINTEF, Tjønnås, Maria; SINTEF, Health Kaspersen, Silje Lill; SINTEF, Health Færevik, Hilde; SINTEF |
| <b>Primary Subject Heading</b>: | Qualitative research                                                                                                     |
| Secondary Subject Heading:      | Occupational and environmental medicine                                                                                  |
| Keywords:                       | hospital, nurse, nursing workforce, 12-hours shifts, shift work, long shift tolerance                                    |
|                                 |                                                                                                                          |

SCHOLARONE™  
Manuscripts

1  
2  
3 **One-year trial of 12-hour shifts in a non-intensive care unit and**  
4  
5  
6 **an intensive care unit in a public hospital: A qualitative study of**  
7  
8  
9 **24 nurses' experiences**  
10  
11

12 Short title: One-year trial of 12-hour shifts in a non-intensive care hospital unit and an  
13  
14 intensive care unit  
15  
16

17  
18  
19  
20 **Corresponding author:**  
21

22 Solveig Osborg Ose  
23

24 E-mail: Solveig.ose@sintef.no  
25

26 Address: SINTEF Technology and Society, Dep. of Health,  
27

28 Postboks 4760 Torgarden, 7465 TRONDHEIM  
29

30 Phone: (+47) 907 28 684  
31  
32  
33

34  
35 *Maria Suong Tjønnås*  
36

37 SINTEF Technology & Society, Dep. of Health, Trondheim, Norway  
38  
39

40 *Silje L. Kaspersen*  
41

42 SINTEF Technology & Society, Dep. of Health, Trondheim, Norway  
43  
44

45 *Hilde Færevik*  
46

47 SINTEF Technology & Society, Dep. of Health, Trondheim, Norway  
48  
49  
50  
51  
52  
53  
54  
55  
56  
57  
58  
59  
60

## Abstract

*Objectives:* The aim of this study was to provide recommendations to hospital owners and employee unions about developing efficient, sustainable, and safe work-hour agreements.

Employees at two clinics of a hospital, one a non-intensive care and the other a newborn intensive care unit, trialled 12-hour shifts on weekends for one year.

*Methods:* We systematically recorded the experiences of 24 nurses working 12-hour shifts, 16 in the medical unit and eight in the intensive care unit for one year. All were interviewed before, during, and at the end of the trial period. The interview material was recorded, transcribed to text, and coded systematically.

*Results:* The experiences of working 12-hour shifts differed considerably between participants, especially those in the intensive care unit. Their individual experiences differed in terms of health consequences, effects on their family, appreciation of extra weekends off, perceived effects on patients, and perceived work task flexibility.

*Conclusions:* The results indicate that individual preference for working 12-hour shifts is a function of own health situation, family situation, work load tolerance, degree of sleep problems, personality and other factors. If the goal is to recruit and retain nurses, nurses should be free to choose to work 12-hour shifts.

*Keywords:*

Hospital, nurse, nursing workforce, 12-hours shifts, shift work, long shift tolerance

## Article summary

### Strengths and limitations of this study:

- A key strength of this study is its longitudinal design.
- The nurses trialled 12-hour shifts for 1 year, and their perspectives were obtained over an 18-month period that captured the nurses' views before, during, and after the intervention.
- Another strength is the richness and authenticity of individual experiences that can be revealed by a qualitative methodology based on a relatively unstructured interview format.
- The study shows the heterogeneity of nurses' preferences for and ability to tolerate 12-hour shifts.
- A requirement for study approval was that the 12-hour shifts would be voluntary. It is possible this study underestimates the risk of adverse outcomes from 12-hour shifts, as nurses who knew they would be susceptible to such outcomes likely chose not to participate.

## 1. Introduction

Hospitals are round-the-clock service providers, requiring staff that contribute to the efficient use of capital investments on days, nights, and weekends. However, there is evidence of adverse physiological and psychological effects from shift work, including disruption to the biological rhythm, sleep disorders, health problems, diminished performance at work, job dissatisfaction, and social isolation.[1] The needs of hospital owners/managers and hospital employees are not always compatible, which can give rise to conflicts, work strikes, and unions demanding a stronger voice in staffing decisions and working time arrangements.



1  
2  
3 One of the suggested solutions has been to introduce 12-hour shifts, which are becoming  
4 increasingly common for hospital nurses.[2] Hospital management may prefer 12-hour shifts  
5 instead of 8-hour shifts because longer shifts require fewer handovers and less overlap  
6 between shifts. Employees may prefer longer shifts to compress their work into fewer days.  
7  
8 However, research has identified a wide range of associations between 12-hour shift work  
9 and negative outcomes for hospital nurses.  
10  
11  
12  
13  
14  
15  
16

17 A systematic literature review of the effects of shift length in healthcare settings found  
18 that few studies were of moderate or high methodological quality, and that the results were  
19 difficult to compare because there is no standard measure of outcomes such as the quality of  
20 patient care.[3] A newer systematic literature review concluded that there is strong evidence  
21 of a positive relationship between long working hours and adverse outcomes in nurses, but  
22 that more evidence is needed to determine the relationship to adverse patient outcomes.[4]  
23  
24 Another systematic review concluded that the risk of making an error appears higher among  
25 nurses working 12-hour or longer on a single shift in acute care hospitals.[5] One systematic  
26 review of the safety implications of long work hours concluded that shifts longer than 8 hours  
27 are associated with a cumulative increase in the risk of accidents; for example, the risk of  
28 accidents after 12 hours is twice that after 8 hours of work.[6] The authors of a recent  
29 systematic literature review suggest that 12-hour shifts may cause health problems and job  
30 dissatisfaction, but that this must be confirmed by more empirical evidence.[7] We do not  
31 find other systematic reviews of hospital nurses working 12-hour shifts. Some cross-sectional  
32 studies report negative experiences from working 12-hour shift compared to 8-hour shifts,[8,  
33 9, 10] while other studies report positive experiences[11] or no risk.[12] One comprehensive  
34 study based on a cross-sectional survey of 31 627 registered nurses in 2 170 general  
35 medical/surgical units within 488 hospitals across 12 European countries concluded that  
36 longer working hours are associated with adverse outcomes for hospital nurses, and that some  
37  
38  
39  
40  
41  
42  
43  
44  
45  
46  
47  
48  
49  
50  
51  
52  
53  
54  
55  
56  
57  
58  
59  
60

1  
2  
3 of these adverse outcomes, such as high burnout rates, may pose safety risks for both patients  
4 and nurses.[2]  
5

6  
7  
8 The topic of shift length is complex, and the results are not consistent across studies. The  
9  
10 mixed results of studies of the effects of 12-hour versus 8-hour shifts in hospitals make it  
11  
12 difficult for both employers and employees to make evidence-based decisions.  
13

14  
15 In the Norwegian democratic welfare state, public authorities are responsible for  
16  
17 providing and financing health services. The responsibility for specialist care lies with the  
18  
19 state (administered by four regional health authorities). The four regions have a total of 39  
20  
21 public hospitals and about 10 small private hospitals funded through contracts with the  
22  
23 regional health authorities. The proportion of health professionals in the labour force is high  
24  
25 in Norway compared with other high- and middle-income countries,[13] and the quality of  
26  
27 health services is high.[14] The Conservative Party, in power since 2013, argued that long  
28  
29 shifts in the health sector may be positive for both patients and employees. In 2015, changes  
30  
31 to the Norwegian legislation on working hours in the health sector enabled employers and  
32  
33 employees to implement long shifts without the approval of the National Labour Inspection  
34  
35 Authority. Employers were now allowed to make deals with local unions permitting daily  
36  
37 work of up to 12.5 hours. Working hours is an important area of conflicts between the nurses'  
38  
39 union (NSF) and hospital employer organisation (SPEKTER) in recent years.  
40  
41  
42  
43

44  
45 In this study, we aimed to perform a thorough qualitative study, to understand nurses'  
46  
47 experiences and perceptions of working 12-hour shifts compared with the usual 8-hour shifts.  
48  
49 To our knowledge, no qualitative study has followed nurses working 12-hour shifts over a  
50  
51 longer period. A qualitative longitudinal study may contribute to a better understanding of the  
52  
53 mixed associations found in previous cross-sectional quantitative studies and may provide  
54  
55 results with clearer policy implications.  
56  
57  
58  
59  
60

1  
2  
3 The aim of this study was to understand the nurses' individual experiences. The  
4 objectives of the study were to (1) identify a hospital with plans for implementing 12-hour  
5 shifts, (2) recruit nurses who wants to share their experiences of working 12-hour shifts, (3)  
6 interview the recruited nurses before, during and after the trial period, (4) transcribe all  
7 interviews and conduct a systematic analyse of the data using applied social science research  
8 methods.  
9  
10  
11  
12  
13  
14  
15  
16  
17  
18  
19

## 20 **2. Methods**

### 21 *2.3. Study setting and design*

22  
23  
24  
25  
26 The hospital included in the study was a hospital in Norway. Two units were included:  
27 one gastrointestinal surgery ward (non-ICU), and a highly specialised newborn intensive care  
28 unit (ICU).  
29  
30  
31  
32

33 The trial was planned and conducted by the hospital while the qualitative study following  
34 the trial was performed by external researchers funded by the Norwegian Research Council  
35 and the social partners.  
36  
37  
38  
39

40 The qualitative study following the trial was planned together with managers and  
41 employees in the two units. The employees did not want to work 12-hour shifts on weekdays,  
42 because of concerns about patient treatment on the busier weekdays. The managers initially  
43 agreed to trial 12-hour shifts on weekends for 6 months, but this was extended to one year in  
44 both units. Only nurses were included in the study, not doctors or other personnel. Thirty  
45 nurses in the non-ICU and 12 in the ICU volunteered to try the 12-hour shifts, of whom 16  
46 and eight, respectively, chose to participate in the qualitative study. They all agreed to be  
47 interviewed once before the trial started, during the trial, and after the trial ended. Most of the  
48  
49  
50  
51  
52  
53  
54  
55  
56  
57  
58  
59  
60

1  
2  
3 individual interviews were conducted during a shift, but some interviews were difficult to  
4  
5 organise within work hours and were conducted during the nurse's leisure time.  
6  
7

#### 8 9 *2.4. Preparation*

10  
11  
12 Before the two units started the trial, the managers and employees agreed on a shift  
13  
14 system with certain number of rest breaks during the 12-hours shifts and that only two 12-  
15  
16 hour shifts should be worked per weekend (Friday included a regular 8-hour shift) and that  
17  
18 the nurses would have the day before and the day after the work weekend off. They decided  
19  
20 that the 12-hours shift should include 90 minutes rest breaks. The non-ICU decided to have  
21  
22 one break lasting one hour and then a 30-minute break while the ICU decided to have 3  
23  
24 breaks each lasting 30 minutes.  
25  
26  
27

28  
29 Participation was voluntary, and employees were formally informed about what  
30  
31 participation implied in a meeting with the researchers. Nurses with a history of high sickness  
32  
33 absence were excluded from the trial, as the managers were concerned that 12-hour shifts  
34  
35 would be too demanding for them and pose a risk to the trial. A pre-trial meeting was also  
36  
37 held in which the managers, union representatives, and researchers discussed the trial and  
38  
39 study with representatives from the National Labour Inspection Authority.  
40  
41

42 The ICU started their trial period on 5 September 2015; the non-ICU, on 1 April 2016.  
43  
44

#### 45 *2.5. Data collection*

46  
47  
48 Three semi-structured interview guides were developed by the research team to cover the  
49  
50 situations before, during, and after the trial. The pre-trial interviews lasted 1 to 1.5 hours, the  
51  
52 in-trial interviews lasted ~1 hour, and the post-trial interviews lasted 30–40 minutes. All  
53  
54 participants provided written consent at the pre-trial interview. Seventy interviews were  
55  
56 conducted by three researchers, as two participants were lost to follow up due to job change.  
57  
58  
59  
60

1  
2  
3 The interviews were conducted in the Norwegian language. The 18-month data collection  
4  
5 period was August 2015 to January 2017.  
6  
7

## 8 9 *2.6. Emergent themes*

10  
11  
12 Projects that involve many interviews produce a vast amount of data or text that is  
13  
14 difficult to structure and analyse systematically. A 10-step method has been developed to  
15  
16 code and structure text using Microsoft Word and Excel.[15] This 10-step method produces a  
17  
18 flexible Word document of interview data separated into logical chapters and subchapters.  
19  
20 All text is coded, and the codes correspond to headings in the final document. Systematic  
21  
22 manual coding ensures that all the content is coded, not just words or terms extracted from  
23  
24 the text. In this study, 140 codes were used. Examples of codes are “work environment”,  
25  
26 “organisation of rotation plans”, “experiences during the 12-hour shifts”, and “family  
27  
28 consequences of 12-hour shifts”. The multidisciplinary team that conducted the interviews  
29  
30 coded all interviews. We developed the code list together at the beginning of the coding  
31  
32 process, coded the same interviews, and revised the code list several times during the process.  
33  
34 All transcribed interviews were fully coded (i.e., all transcribed text was assigned a code). In  
35  
36 this study, we analysed data under the main heading of “12-hour shifts”. The remaining data  
37  
38 provide information about the hospital and unit context. This information is not used  
39  
40 explicitly in this study. Using the 10-step method, we identified the following main topics for  
41  
42 the analysis: “pre-trial expectations of working 12-hour shifts on weekends”, “organising and  
43  
44 implementing the 12-hour shift schedule”, “consequences of working 12-hour shifts” (with  
45  
46 subheadings “positive/negative effects during the shift”, “positive/negative effects during the  
47  
48 off-shift periods”, “sleep”, “quality of treatment”, “health problems”, etc.), “decision after the  
49  
50 end of the trial period”, and “individual overall assessment”. The results section is organised  
51  
52 under these headings.  
53  
54  
55  
56  
57  
58  
59  
60

## 2.7. Patient and Public Involvement statement.

This health services research study includes employed public hospital nurses. Both the employer organisation and the nurses' union were involved from the beginning of the project to the end.

## 2.8. Ethics

This study was approved by the Regional Committees for Medical and Health Research Ethics in Mid-Norway (REC) (reference number 2014/2017).

## 3. Results

The difference in the type of care at the two units was reflected in the staff experience and education levels: the non-ICU had many young nurses who had not completed any specialised training, and it had relatively high turnover; the ICU had more-experienced staff, most of whom had a specialisation. There were no male nurses working at either unit. The non-ICU had ~60 nurses; the ICU, ~120 nurses. Most nurses at both units worked a rotating three-shift schedule (day, evening, night), but some worked exclusively days or evenings, and others only overnight shifts. Patients stayed from 1 day to several months in both units.

### 3.1. Expectations before starting the 12-hour shifts

All participants expressed their excitement about starting 12-hour shifts. Participants were asked, "What do you expect will happen when you start working 12-hour shifts on the weekends?" without any explicit cues. We have organised the answers into topics according to the how the responses were coded.

### 3.1.1. Not much difference from the current situation

Some of the nurses in both units thought it was difficult to have any expectations because the work load was generally unpredictable. Some periods were very busy, with many severely ill patients, whereas other periods were less busy. The nurses in the non-ICU thought that the long shifts might occur during peak periods, and some expressed concerns about this.

*It can be very busy here, so it [working 12-hour shifts] will be difficult because you do not have time to be tired during a busy day shift. At night, when you are tired because it's night time, a busy shift will be very tough (Nurse 14, non-ICU, pre-trial interview).*

Many of the nurses in the ICU were used to working double shifts, and they did not expect the 12-hour shifts to be more difficult.

### 3.1.2. More tired

Most of the respondents expected to be more tired after a weekend working 12-hour shifts compared with a weekend working 8-hour shifts (i.e., 8 hours more than usual for a day-shift weekend):

*I think I'll be very tired from working that weekend. It is good that we'll have the Monday after off, so we can get our strength back before starting the next shift (Nurse 13, non-ICU, pre-trial interview).*

When we asked whether they were tired after a regular 8-hour shift, they typically answered:

*It varies a lot depending on my work tasks and the amount of pressure at the unit. But I'm tired at the end of a regular 8-hour shift if it's a busy day (Nurse 2, ICU, pre-trial interview).*

1  
2  
3 The participants in both units confirmed that they were exhausted after a busy shift.  
4  
5 However, most recovered well before the next shift, although problems obtaining sufficient  
6  
7 sleep between an evening and morning shift were common.  
8  
9

### 10 3.1.3. Nights

11  
12 Some participants worked only nights. They typically expected that the 12-hour shifts  
13  
14 would not be significantly different:  
15

16  
17 *The night shift is rather long already—it's 10 hours now. When I start doing*  
18  
19 *12-hour shifts, I will start at 7.45 pm instead of 9.30 pm. The difference is*  
20  
21 *not that big, and I'll get to have a 1-hour break during the shift. I think it will*  
22  
23 *be beneficial to start earlier in the evening (Nurse 10, non-ICU, pre-trial*  
24  
25 *interview).*  
26  
27

28  
29  
30 Those working both day and night shifts during their 12-hour shift weekends shared this  
31  
32 view about the nights.  
33

### 34 3.1.4. Health concerns

35  
36 Some respondents were not concerned about potential adverse health effects from  
37  
38 working 12-hour shifts, not because they thought such shifts would be healthy, but rather  
39  
40 because it was already difficult to work a rotating three-shift schedule. However, others did  
41  
42 express concerns:  
43  
44

45  
46 *I'm cursed with neck pain when I'm stressed. I'm wondering whether my*  
47  
48 *back and neck will handle it [to work 12-hour shifts]. But as long as I get to*  
49  
50 *take rest breaks during the shifts, I think I'll be fine (Nurse 10, non-ICU, pre-*  
51  
52 *trial interview).*  
53  
54  
55  
56  
57  
58  
59  
60



### 3.1.5. Attitude and mental preparation

Several of the respondents argued that the experience would largely depend on their attitudes: *“If you say to yourself that this is not going to work out well, it will not work out well”*. Participants in both units felt this way, but this is also related to personality:

*I don't really have any specific concerns; I usually take things as they come.*

*I'm thinking that this weekend will be about work and nothing else; it doesn't matter that there are some more hours (Nurse 16, non-ICU, pre-trial interview).*

However, some ICU nurses were not convinced that the introduction of 12-hour shifts would be that easy. They reflected on the need to prepare mentally for the long shift:

*I want to try working 12-hour shifts, but I am not sure because I haven't tried this before. Maybe I won't like it. But I think I'll have to be mentally prepared because on days when I usually finish at 3 pm, I will now have to work until 7.30 pm. (Nurse 1, ICU, pre-trial interview).*

### 3.1.6. Patient consequences

The nurses in the ICU seemed to be more concerned than the nurses in the non-ICU about potential adverse consequences for patients of nurses working longer shifts:

*I'm not sceptical...but I think we must find out whether 12-hour shifts will increase the probability of making mistakes. Will we be totally exhausted? - At the end of the shift, will we be unable to do anything? Will we be able to do the work tasks we are supposed to do? (Nurse 1, ICU, pre-trial interview)*

1  
2  
3 The staff in the newborn ICU had strong focus on quality; for example, two colleagues  
4 would always double-check medicine prescriptions (double-signing). They wondered  
5 whether they might be too tired at the end of the 12-hour shifts to sustain quality:  
6  
7  
8

9  
10  
11 *If you have a family making many demands or a newborn who needs constant*  
12 *monitoring, it will be demanding to work 12 hours with the same patient and*  
13 *family. At the end of the shift, there might be a small risk of making mistakes;*  
14 *for instance, we might overlook that the infant's condition has worsened...*  
15  
16  
17  
18  
19  
20 *(Nurse 6, ICU, pre-trial interview).*  
21  
22

### 23 **3.1.7. Effect on leisure and family life**

24  
25 Several of the respondents expressed concern about how the 12-hour shifts would affect  
26 their family life.  
27  
28

29  
30  
31 *Well, I'll have to see how this works out with the rest of my life. It's not just*  
32 *that I'll be at work for more hours, it's that this must also fit my life outside*  
33 *work (Nurse 1, ICU, pre-trial interview).*  
34  
35  
36  
37

38  
39 However, the criteria for selecting participants imply that most of the respondents had a  
40 family situation that allowed them to try the 12-hour shifts on weekends.  
41  
42

### 43 **3.1.8. Enthusiasm and resistance**

44  
45 Some had great expectations about introducing the 12-hour shifts:  
46  
47

48  
49  
50 *My expectations are first and foremost that 12-hour shifts will be introduced*  
51 *as a permanent arrangement and that this will lead to an improved quality*  
52 *of nursing both for the newborn patients and parents (Nurse 5, ICU, pre-*  
53 *trial interview).*  
54  
55  
56  
57  
58  
59  
60

1  
2  
3 Others were indifferent. When we asked about the atmosphere at the units in relation to the  
4  
5 12-hour shift trial, a typical answer was:  
6  
7

8 *Well, some of the nurses are happy to try 12-hour shifts, but others do not*  
9 *want to. But I do not think there has been any strong protest against the trial*  
10 *(Nurse 10, non-ICU, pre-trial interview).*  
11  
12  
13  
14

15  
16 Those unwilling to try 12-hour shifts typically had small children. Their colleagues who  
17  
18 chose to participate in the trial showed understanding:  
19  
20

21 *It's easy to understand if they [nurses who do not want to try 12-hour shifts]*  
22 *have kids. Working a regular 8-hour shift allows you to see your kids before*  
23 *and after work, but this is different when working 12-hour shifts: they are in*  
24 *bed when you come home and still asleep when you leave for your next shift*  
25 *(Nurse 12, non-ICU, pre-trial interview).*  
26  
27  
28  
29  
30  
31  
32  
33

### 34 3.2. Organising the 12-hour shift schedule 35 36

37 The planning and organising of the 12-hour rotating shifts was not problematic in the  
38 non-ICU but was frustrating for those responsible for the rotation plans in the ICU. The ICU  
39 had eight nurses working 12-hour shifts on the weekends: four on day shifts and four on night  
40 shifts. In general, the rotation plans in the ICU unit were complicated. The unit divided all  
41 nurses into three groups, and every shift team within each group had to include the right  
42 formal competencies, and a specified mix of nurses with extensive experience and those with  
43 less experience. The planners had to consider adjustments because of the patient mix and for  
44 individual employees. For example, some nurses were insufficiently experienced to feel  
45 comfortable working alone with very sick infants. Others did not have the competencies to  
46 comfortably perform all the specialised roles and tasks that might be required of them during  
47  
48  
49  
50  
51  
52  
53  
54  
55  
56  
57  
58  
59  
60

1  
2  
3 a shift, based on the skills mix of their on-shift colleagues. A willingness to adjust the  
4  
5 schedule to accommodate individual employee preferences, together with meeting other  
6  
7 competency and experience profile criteria for every shift, made planning a rotating roster a  
8  
9 complex task. The addition to this complexity by having to include 12-hour shifts caused  
10  
11 frustration for the planners. However, the trial period was extended by 6 months, and the  
12  
13 planners said that planning the 12-hour shifts became easier as they gained experience.  
14  
15

### 16 17 18 3.4. Consequences of working 12-hour shifts

#### 19 20 21 3.4.1. Taking rest breaks as planned

22  
23 We asked participants whether they could take rest breaks as planned when they worked  
24  
25 12-hours instead of 8-hours shifts, and most of the respondents did not experience any  
26  
27 difficulties.  
28

29  
30 *That went as planned. One weekend, my rest break was moved half an hour,*  
31  
32 *but that was okay. It was right after an 8-hour shift started, and there were*  
33  
34 *too few experienced nurses on duty, so I felt I couldn't take my break exactly*  
35  
36 *when planned. But otherwise, I think we could all take the planned rests and*  
37  
38 *pauses (Nurse 1, ICU, in-trial interview).*  
39  
40

41  
42  
43 The non-ICU had a room with a bed for the nurses' use, for napping and relaxing for 1  
44  
45 hour when working 12-hour shifts. Their experience with this was positive.  
46

47  
48 *That [the bed in a designated room] was very comfortable. Nobody called*  
49  
50 *me on my phone and no one came into the room. The others respected this*  
51  
52 *hour [for rest], and the threshold for knocking at that door was high (Nurse*  
53  
54 *1, non-ICU, in-trial interview).*  
55  
56

57  
58 However, not all respondents had good experiences trying to nap during their shift:  
59  
60

1  
2  
3 *Well, I slept once or twice during my 1-hour break during the night shift. But*  
4 *when I woke up I was feeling queasy. I was very tired when I woke up and*  
5 *felt off-balance. So, I have stopped napping during the 12-hour night shift*  
6 *(Nurse 10, non-ICU, in-trial interview).*  
7  
8  
9  
10  
11  
12

13 We asked how she spent that hour during the following 12-hour night shifts  
14 afterwards. She answered:  
15

16  
17  
18 *I can lie down for a little while, but I keep the lights on. I can listen to music*  
19 *or watch TV on my mobile (Nurse 10, non-ICU, in-trial interview).*  
20  
21  
22  
23

24 Some created their own mix of activities during the 1-hour break at night:  
25

26  
27 *In my break during the night, first I sleep half an hour and then I watch a*  
28 *film or an episode from a TV show. The first few times, I slept for the whole*  
29 *hour, but I was unwell when I woke up, and I couldn't sleep when I got home.*  
30 *After I started with half an hour of sleep and half an hour watching*  
31 *something, I felt much better (Nurse 13, non-ICU, in-trial interview).*  
32  
33  
34  
35  
36  
37  
38

39 Another nurse working in the non-ICU described her experience:  
40

41  
42 *I'm a bit queasy at first when I wake up, but I'm okay once I get on my feet.*  
43 *I think it is safer to have this nap because I have to drive home after the night*  
44 *shift (Nurse 11, non-ICU, in-trial interview).*  
45  
46  
47  
48  
49

50 One of the respondents had a more determined approach to sleeping:  
51

52  
53 *Yes, I was able to get some sleep during both the day shifts and the night*  
54 *shifts. I have become quite good at power napping, and I had decided that I*  
55  
56  
57  
58  
59  
60

1  
2  
3 *wanted to be good at that. I was not very good at it before, but now I can do*  
4  
5 *it. I fall asleep quite simply now (Nurse 7, non-ICU, in-trial interview).*  
6  
7

8  
9 Some of the nurses went outside during their break for fresh air, especially if the weather  
10 was pleasant. Others rested before their shift, saying that they did not need to sleep, but it still  
11 felt good to lie down and relax, and to think about something other than work.  
12  
13

14  
15 However, working in a hospital entails a level of uncertainty, and many unplanned events  
16 during the shift can make it impossible to take the planned rest breaks.  
17  
18

19  
20  
21 *Last weekend, on the first night, I had two emergency patients who were very*  
22 *ill. There was much uncertainty about whether they had to be operated on*  
23 *during the night. In addition to these two, I had one uneasy patient and one*  
24 *mentally ill patient who needed constant monitoring. The night after, at 1.30*  
25 *am, the alarm sounded because a patient had a cardiac arrest, and we had*  
26 *to use the defibrillator and perform chest compressions. I think it took 2.5*  
27 *hours before we got the patient to the ICU. That weekend, I did not get my*  
28 *1-hour rest break during any of the night shifts (Nurse 2, non-ICU, in-trial*  
29 *interview).*  
30  
31  
32  
33  
34  
35  
36  
37  
38  
39  
40  
41

#### 42 **3.4.2. Health consequences**

43  
44 The nurses in the non-ICU discussed the health effects of working 12-hour shifts.  
45  
46 Some of the nurses did not feel any difference compared with working 8-hour shifts, but  
47 they needed the day off after the work weekend to recover. Others described different  
48  
49 negative experiences of working longer shifts than usual:  
50  
51

52  
53  
54 *At the end of the shift, I had a headache and my eyes were dry and sore from*  
55 *the dry air in the unit. I felt like I had been at work for a long time (Nurse*  
56 *15, non-ICU, in-trial interview).*  
57  
58  
59  
60

1  
2  
3 Others mentioned health problems that may have been worsened by working long shifts:  
4  
5

6 *The night-shift weekends are very demanding, but fortunately, they only*  
7 *occur every 8 weeks. The weekends with the day shifts are okay, but I have*  
8 *back problems, and my back is sore after work weekends. Maybe I should*  
9 *not work in this way, but the carrot is, of course, that I get to work every*  
10 *fourth weekend instead of every third weekend (Nurse 11, non-ICU, in-trial*  
11 *interview).*  
12  
13  
14  
15  
16  
17  
18  
19

20  
21 Most of the participants felt greater fatigue in their legs after a 12-hour shift, but some did  
22 not, despite the longer time spent standing and walking compared with an 8-hour shift. Most  
23 of the respondents described having a “tired head” after a 12-hour shift, but few reported any  
24 unexpected physical pain or health problems.  
25  
26  
27  
28  
29

30  
31 *I think it has been okay, but I get a burning sensation under my feet, and feel*  
32 *tired. And, of course, at the end of the shift on the first weekend, I really*  
33 *hoped there would be no childbirth in the evening. You think such thoughts.*  
34 *(Nurse 6, ICU, in-trial interview).*  
35  
36  
37  
38  
39  
40

41 Another nurse had the opposite experience:  
42  
43

44 *I worked 12-hour day shifts both Saturday and Sunday. It occurred to me*  
45 *that I can't remember the last time I wasn't exhausted after a shift. But this*  
46 *weekend, my legs were less tired than on a regular work weekend. I wasn't*  
47 *physically tired at all from working this weekend (Nurse 5, ICU, in-trial*  
48 *interview).*  
49  
50  
51  
52  
53  
54  
55

56 Some of the participants found it more difficult to work 12-hour day shifts than 12-hour  
57 night shifts:  
58  
59  
60

1  
2  
3 *The days are a bit longer than the nights. The difference between a 10-hour*  
4 *and 12-hour night shift is small, but the day... You need better shoes because*  
5 *your legs get tired (Nurse 3, ICU, in-trial interview).*  
6  
7  
8  
9

10  
11 The nurses in the non-ICU expressed uniform satisfaction with the opportunity to lie  
12  
13 down during the 1-hour break:  
14

15  
16 *I do not feel more tired than usual. I feel the night shifts are very good, with*  
17 *the 1-hour rest break. It is almost the worst [to work] the night before*  
18 *Saturday, because then we work a regular night shift without the mandatory*  
19 *break. I almost look forward to the next night when I work 12 hours and get*  
20 *to have a break for a whole hour (Nurse 13, non-ICU, in-trial interview).*  
21  
22  
23  
24  
25  
26  
27

### 28 **3.4.3. Patient outcomes**

29  
30 None of the respondents admitted to making any mistakes during their 12-hour shifts, but  
31 they were not always sure:  
32  
33

34  
35  
36 *I did not make any mistakes. But one thinks about it—after 11 hours, it could*  
37 *be easy to misread a graph, or something similar. Not that it has happened,*  
38 *but we are not as awake at the end of the shift as at the beginning (Nurse 2,*  
39 *non-ICU, in-trial interview).*  
40  
41  
42  
43  
44  
45

46 When asked about observed patient outcomes, some nurses said that they did not think  
47 patients noticed much difference. Some patients in the non-ICU had observed that some of  
48 the nurses were present for a long time, and had asked them about this. The nurses did not  
49 receive any negative reactions from the patients after explaining the trial, only positive  
50 responses. They also adjusted their rest break to their work tasks to minimise the  
51 consequences for the patients.  
52  
53  
54  
55  
56  
57  
58  
59  
60



1  
2  
3 *I take my rest break after I have finished distributing medication, pain*  
4 *relievers, and meals, so my patients don't often need to call for someone else*  
5 *during my break (Nurse 13, non-ICU, post-trial interview).*  
6  
7  
8  
9

#### 10 **3.4.4. Family situation and friends**

11  
12 Most respondents felt that the most important positive consequence of working 12-hour  
13 shifts was only having to work every fourth weekend, instead of every third. They felt this  
14 was important because of their family situations.  
15  
16  
17  
18

19  
20 *[Working] every fourth weekend instead of every third is very important to*  
21 *me, especially since my second child was born. It's okay to have time off*  
22 *during the weekdays, but this is not when my family has time off. So weekends*  
23 *off are very precious to me (Nurse 1, non-ICU, in-trial interview).*  
24  
25  
26  
27  
28  
29

30 Some nurses had asked their family explicitly what they thought about the 12-hour shifts:  
31

32  
33 *They are happy I'm home on more weekends. Whether I work a 12-hour or*  
34 *8-hour shift during the weekend does not matter to them. Maybe I sleep more*  
35 *during the regular work weekends, so the kids do not see me much on these*  
36 *weekends anyway (Nurse 11, non-ICU, in-trial interview).*  
37  
38  
39  
40  
41  
42

43 Individual family situations sometimes necessitated adjustments to the work schedule:  
44

45  
46 *I have my son every second weekend, and this is the only reason for me to*  
47 *work the 12-hour shifts every fourth instead of every third weekend (Nurse*  
48 *16, non-ICU, in-trial interview).*  
49  
50  
51  
52  
53

54 Some of the nurses without children also valued the weekend more than weekdays for  
55 many reasons:  
56  
57  
58  
59  
60

1  
2  
3 ...none of my friends outside of work do shift-work, so for me, the weekends  
4  
5 are sacred (Nurse 15, non-ICU, in-trial interview).  
6  
7

8  
9 Family needs could be demanding for nurses with young children. For example:

10  
11 *As a joke, I say that my job at the hospital is my second job, because my main*  
12  
13 *job is at home. I have many things to keep track on at home, and when I have*  
14  
15 *a work weekend, I still want to be with the kids. I feel bad about going to*  
16  
17 *work, so when I get up in the morning, I must organise everything [my kids*  
18  
19 *might need]. But when I work 12-hour shifts, I say to myself, “Okay this is*  
20  
21 *my work weekend”, and then I concentrate on that and think about the fact*  
22  
23 *that I have three weekends off afterwards when I can be with my children*  
24  
25 *(Nurse 7, non-ICU, in-trial interview).*  
26  
27  
28  
29  
30

31 All participants who were married noted that their husbands wanted them to work 12-  
32  
33 hour shifts every fourth weekend instead of 8-hour shifts every third weekend.  
34  
35

36 *My husband wants me to work the 12-hour shift weekends. He takes the kids*  
37  
38 *to visit their grandparents on my work weekends and I have a quiet house.*  
39  
40 *This is fine for them and for me (Nurse 13, non-ICU, in-trial interview).*  
41  
42  
43

44 A more experienced nurse with adult children also noted that her husband liked this  
45  
46 arrangement:  
47  
48

49 *My husband thinks this is fine, because we can go to our holiday cabin on*  
50  
51 *more weekends than before. And on my work weekend, he can go to the cabin*  
52  
53 *alone, because all I do that weekend is work (Nurse 8, ICU, in-trial*  
54  
55 *interview).*  
56  
57  
58

59 However, others felt they missed out at home when they worked a long shift on Saturday:  
60

1  
2  
3 *It was wonderful to get home at 8 pm on Saturday night and have a nice meal*  
4 *and relax with my boyfriend. This gave me a bit more of a weekend feeling.*  
5  
6 *Two or three hours of rest before going to bed was good. Now, I get home at*  
7  
8 *10.30 pm and feel I must rush to bed to get enough sleep before the next shift*  
9  
10 *(Nurse 2, non-ICU, in-trial interview).*  
11  
12  
13  
14

#### 15 **3.4.5. Tasks at work**

16  
17 Many of the participants experienced greater flexibility during the 12-hour shifts than the  
18  
19 8-hour shifts.  
20  
21

22  
23 *The 12-hour night shifts have been terrific. I have a much better overview*  
24 *when I arrive at 8 pm and can start the evening round of medicines, start to*  
25 *get the antibiotics ready, organise the medicine for the next day, and so on.*  
26  
27 *And I finish my round earlier compared with when we start working at*  
28  
29 *9.30 or 10 pm (Nurse 10, non-ICU, in-trial interview).*  
30  
31  
32  
33  
34

35 The nurses also commented that they experienced fewer interruptions of work tasks  
36  
37 during the 12-hour shifts:  
38  
39

40  
41 *I noticed this at the time that would have been the regular shift change [had*  
42 *it been an 8-hour day], when we were in the middle of a procedure, on one*  
43 *of the days when I worked the 12-hour day shift. I was assisting a doctor with*  
44 *a lengthy procedure, and usually one gets a bit stressed at such times,*  
45 *because we have to finish the report and everything else before the next shift*  
46 *starts at 2.30 pm. And then I thought, “God, this is actually very good”,*  
47 *because I could relax and concentrate on what I was doing, and I took my*  
48  
49 *time and calmly finished the procedure around 4 pm. Usually, I would have*  
50  
51 *to hand over to the next nurse during the procedure and give a short oral*  
52  
53  
54  
55  
56  
57  
58  
59  
60

1  
2  
3 *report. We lose continuity this way, because the doctors are there the entire*  
4 *day. So I think it's better for all [having 12-hour shifts]. I didn't have a*  
5 *ticking clock at the back of my mind all day (Nurse 1, ICU, in-trial interview).*  
6  
7  
8  
9

10  
11 This nurse also commented on the satisfying experience of completing jobs on her own,  
12 rather than having to leave them to the next shift:  
13

14  
15  
16 *And I feel that I get to do what I'm supposed to do on the days I work 12-*  
17 *hour shifts. Instead of telling the next nurse what I have planned to do, I do*  
18 *it myself. Because I can't be sure that the next nurse has the same priorities*  
19 *and will do what I planned (Nurse 1, ICU, in-trial interview).*  
20  
21  
22  
23  
24  
25

26 Being present in the unit for a longer time may make the job easier because the nurses can  
27 prepare and get to know patients better. During the trial period, the participants always  
28 worked on the Friday before. Some noted that this prepared them better for the long shifts on  
29 Saturday and Sunday because they knew what to expect, having learned more about the  
30 patients in the ward.  
31  
32  
33  
34  
35  
36

37  
38 Several participants also felt they could plan and structure a long shift better:  
39

40  
41 *The ward is usually busy, and I have had work weekends where I have been*  
42 *very tired and have been very happy to go home at 3 pm. However, I have*  
43 *not always been happy with my work, because too much was left for the next*  
44 *shift [to finish]. Now I can plan better and complete all my tasks (Nurse 9,*  
45 *non-ICU, in-trial interview).*  
46  
47  
48  
49  
50  
51

52  
53 Other nurses reported similar experiences:  
54  
55  
56  
57  
58  
59  
60

1  
2  
3 *If you've promised the parents the infant will have a bath, you don't have to*  
4 *stress and do it early in the day; you can plan to find a calmer period, to*  
5 *have more time available for the task (Nurse 9, ICU, in-trial interview).*  
6  
7  
8  
9

10  
11 Another nurse at the same unit had similar experiences working night shifts:  
12

13  
14 *I think I do the same as usual. However, I think I have more time to do my*  
15 *tasks. Nothing must be done right away because I'm going to be here until*  
16 *the next day (Nurse 4, ICU, in-trial interview)*  
17  
18  
19  
20

### 21 22 3.5. Decisions after the end of the trial period 23

24  
25 The manager at the ICU decided not to continue the 12-hour weekend shifts after the trial  
26 period, whereas the manager at the non-ICU decided to allow more nurses to try out this  
27 approach.  
28  
29

30  
31 For the nurses in the non-ICU, working fewer weekends and being able to provide a  
32 higher quality of care were the main reasons for continuing to work the 12-hour shifts. Some  
33 participants had not expected the 12-hour shifts to be successful in this very busy unit, but  
34 realised that they liked working longer shifts:  
35  
36  
37  
38  
39  
40

41  
42 *I liked working 12-hour shifts very much. I was sceptical the first time I heard*  
43 *about it, but I wanted to try. I think they are suitable for me [because] I have*  
44 *good capacity to work, and think that when I'm at work, I like to work hard.*  
45 *I can tolerate this [way of working], but I have not been sick and I can handle*  
46 *the pressure quite well (Nurse 7, non-ICU, post-trial interview).*  
47  
48  
49  
50  
51  
52

53  
54 The participants from the ICU reported mixed experiences at the end of the trial period.  
55 Some were unhappy about the decision not to implement 12-hour shifts as part of the regular  
56 schedule once the trial period was finished. They argued that this decision was only made  
57  
58  
59  
60

1  
2  
3 because the schedule planners found it difficult to implement 12-hour shift schedules. When  
4  
5 one participant was asked whether the scheduling process could be made easier if the unit  
6  
7 were organised differently, she replied:  
8  
9

10  
11 *Yes, without doubt. If we were divided into two groups instead of three it*  
12  
13 *would be much easier to make up the shift plans. We would have more people*  
14  
15 *to choose from and that would give more flexibility (Nurse 7, ICU, post-trial*  
16  
17 *interview).*  
18  
19

20  
21 Another nurse in the ICU also wanted the 12-hour shifts to be continued, and shared the  
22  
23 following experience after the trial ended.  
24  
25

26  
27 *Now I see a lot of work weekends on my shift plan. I experienced a significant*  
28  
29 *difference between working every fourth and every third weekend. Now,*  
30  
31 *there are more conflicts with other things that happen outside work. I did not*  
32  
33 *experience this to the same extent when I worked every fourth weekend*  
34  
35 *(Nurse 1, ICU, post-trial interview).*  
36  
37

38  
39 Others were indifferent about the decision not to continue the 12-hour shifts:  
40  
41

42  
43 *I haven't really engaged in this discussion; I just noticed that they didn't*  
44  
45 *want to continue. My first thought was that it [the decision] sucked, but then*  
46  
47 *I decided to focus my energy on doing my job instead (Nurse 5, ICU, post-*  
48  
49 *trial interview).*  
50  
51

52  
53 A small group of nurses had decided not to continue with the 12-hour shifts before  
54  
55 management decided not to continue. Not all nurses shared a clear preference for avoiding  
56  
57 working on weekends:  
58  
59  
60

1  
2  
3 *Well, I don't have small children. For some, the 12-hour shifts are better—*  
4 *for instance, those only working night shifts and those who have to commute*  
5 *longer distances (Nurse 4, ICU, post-trial interview).*  
6  
7

8  
9  
10  
11 *Well, it is good to have an extra weekend off, but I must work much more*  
12 *during the weekdays Monday to Friday. That's what everybody else does.*  
13 *But I'm happy working shifts with more time off on weekdays (Nurse 2, ICU,*  
14 *post-trial interview).*  
15  
16  
17  
18  
19

20  
21 Some ICU nurses who had been sceptical before the trial had positive experiences and  
22 wanted to continue. Others who had been positive before the trial did not want to continue  
23 working 12-hour shifts after the trial. This indicates that it may be difficult for nurses to  
24 anticipate their own preferences for shift lengths accurately, before trying them in practice.  
25  
26  
27  
28  
29

#### 30 31 **4. Discussion** 32

33  
34  
35 This qualitative longitudinal study followed nurses for 18 months before, during, and  
36 after they trialled working 12-hour shifts on weekends for 1 year. Their participation in the  
37 12-hour shift work was completely voluntary, and only those motivated to work the 12-hour  
38 shifts participated. The aim of the study was to understand the nurses' individual experiences.  
39  
40  
41  
42  
43  
44  
45  
46  
47  
48  
49  
50  
51  
52  
53  
54  
55  
56  
57  
58  
59  
60  
60  
Their perceptions give insight into the potential consequences of any future reform to  
increase the standard shift length for hospital nurses from 8 hours to 12 hours. In the  
following sections, we discuss the themes that emerged from this research: job satisfaction,  
health effects, effects on sleep, patient safety, and employee safety.

We asked all respondents how they perceived their work environment and all  
participating nurses had favourable perceptions of their work environment. This may be an  
important condition for implementing new shift arrangements. The ICU was reorganised

1  
2  
3 when the trial period started, and all nurses were divided into three groups with different  
4  
5 tasks. During the interviews, it appeared that not all employees were satisfied with the new  
6  
7 organisation of the unit. Their main argument against the reorganisation was that they had  
8  
9 each ended up with a narrower spectrum of work tasks than desired. Such changes may have  
10  
11 negative impact especially on job satisfaction.  
12  
13  
14

#### 15 16 *4.1. Job satisfaction*

17  
18  
19 Job satisfaction was high overall among the participants. In the non-ICU, the nurses were  
20  
21 generally happy that the use of 12-hour shifts would continue, and more nurses wanted to try  
22  
23 the extended shifts. In the ICU, the nurses had mixed reactions to the managers' decision not  
24  
25 to continue the 12-hour shifts. Some thought this was a poor decision; others were indifferent  
26  
27 or supportive. Overall job satisfaction at the units does not appear to have been affected by  
28  
29 the 12-hour shifts. However, different preferences may affect the nurses' ongoing job  
30  
31 satisfaction at the individual level. This is consistent with the findings of Kundi et al.  
32  
33 (1995),[16] who found similar levels of job satisfaction between 8-hour shift workers and 12-  
34  
35 hour shift workers. In our study, only volunteers were included, and no one was forced to  
36  
37 work the extended shift against their will. This study therefore cannot rule out the possibility  
38  
39 of negative consequences on job satisfaction if nurses are forced to work longer shifts, rather  
40  
41 than volunteering.  
42  
43  
44  
45  
46

#### 47 48 *4.2. Health effects*

49  
50  
51 Because participation was voluntary, and the same nurses were followed for 18 months,  
52  
53 this study was able to probe factors behind the stress and burnout reported in the literature.[2,  
54  
55 9, 8] Because the 12-hour shift was implemented only on weekends, we expected to see less  
56  
57 significant effects on health and wellbeing among the participating nurses compared with  
58  
59 those working 12-hour shifts throughout the week in other studies. Most of the participants in  
60



1  
2  
3 our study experienced a greater physical and mental workload during 12-hour shifts  
4  
5 compared with 8-hour shifts. This was mainly because of the longer time spent walking and  
6  
7 standing and being exposed to the dry air in the units. A recovery period was needed after a  
8  
9 12-hour shift weekend. The nurses commented that pre-existing health problems might be  
10  
11 worsened by working long shifts. Some had health concerns before they started the trial, but  
12  
13 still felt that there were advantages of working every fourth instead of every third weekend  
14  
15 and wished to continue. It is possible that these nurses overlooked or underreported negative  
16  
17 health consequences of the longer shifts. We suggest that negative health effects of 12-hours  
18  
19 shifts will be significant if employees with health problems are forced to work longer shifts  
20  
21 than they can tolerate given their health status.  
22  
23  
24  
25  
26

#### 27 *4.3. Effects on sleep*

28  
29

30 The literature shows that nurses accrue considerable sleep debt while working successive  
31  
32 12-hour shifts, with accompanying fatigue and sleepiness, and that some nurses are more  
33  
34 severely affected by sleep loss than others, as measured by attention lapses.[10] In this study,  
35  
36 the 12-hour shifts were worked only on weekends and were voluntary, and the effect on sleep  
37  
38 was expected to be slight. We find that those who reported sleeping problems in the pre-trial  
39  
40 interviews had the same sleeping problems when they were working 12-hour shifts. None of  
41  
42 the participants reported having sleep problems from starting to work 12-hour shifts.  
43  
44 However, we cannot rule out the possibility that the nurses who self-selected to participate  
45  
46 were less susceptible to sleep problems than those who opted out. However, of the 24  
47  
48 participants, many reported sleeping problems in the pre-trial interviews, so the opposite may  
49  
50 also be the case. We suggest that the observed variation in individual sleep quality gives an  
51  
52 important argument for hospital owners to offer the nurses and other employee different  
53  
54 choices of working hour agreements.  
55  
56  
57  
58  
59  
60

#### 4.4. Patient safety

There is some evidence that longer work hours for hospital staff can increase the risk of errors and hospital-associated infection among patients.[17, 18] However, a systematic literature review concluded that more evidence is needed to conclude whether there is a causal relationship between long work hours and adverse patient outcomes.[4] In this study, all participants acknowledged that the risk of mistakes was higher at the end than at the beginning of a shift. However, none of the nurses reported making mistakes during the trial period.

One finding that is rarely reported in the literature is a positive effect on patients and the quality of care from longer nurse work hours—yet this was reported by our participants. Most felt they had more time to complete their tasks, and the opportunity to follow their patients for longer during each shift.

We did not interview the doctors, and we do not know whether this trial had any effects on them. However, it is plausible the doctors benefited from having fewer disruptions during procedures for hand-overs between the nurses working different shifts, and from having fewer nurses to communicate with during the day.

The 12-hour night shifts were perceived to work well in this trial, especially in the non-ICU, where nurses had their own room with a bed for resting. A recent study reported that 12-hour night shift workers exhibit more performance variability and subjective sleepiness than day workers, and suggests that workplace napping may be considered.[19] We find that the 1-hour rest break available to the nurses working 12-hour night shift in our study, was very appreciated by the nurses. The 1-hour break was used in various ways by the nurses, and most satisfaction was expressed by those who had access to a designated room with a bed where they could lay down in their 1-hour rest break during the night shift. This arrangement

1  
2  
3 may have contributed to the lower level of sleepiness and performance variability self-  
4 reported by nurses in our study.  
5  
6

7  
8 Turning to the long duration of night shifts in this study, the participating nurses had  
9 positive experiences with the 12-hour night shifts overall. Several factors may account for  
10 this. Notably, all participants in the medical unit felt that having a bed in a designated staff  
11 room for rest breaks during the long night shifts was an advantage. This may be an effective  
12 method for reducing the increased risk of accidents in long shifts reported in the literature.[6]  
13  
14  
15  
16  
17  
18  
19

#### 20 4.5. *Employee safety*

21  
22

23 Shift work generally, and night shifts and long shifts in particular, are frequently  
24 associated with adverse effects on employees. However, this study found mixed views on the  
25 employee safety implications of longer (12-hour) shifts, including for the night shifts.  
26  
27  
28  
29

30 On one hand, the managers of both units argued that “pure” night shift workers became  
31 an isolated group, whom the managers never met and who did not receive the professional  
32 updates received by nurses working days and evenings. They therefore wanted the night  
33 shifts to be spread among more nurses, and had reduced the size of the designated pure night  
34 team, i.e., the nurses working night shifts exclusively.  
35  
36  
37  
38  
39  
40  
41

42 On the other hand, this change was not preferred by most of the nurses—regardless of  
43 whether they wanted to work primarily nights or did not handle night work well. The  
44 literature suggests a possible explanation. Wagstaff and Lie (2011) concluded that pure night  
45 work may provide some protection against the negative health effects often reported from  
46 intermittent night shift work, by allowing resynchronisation. Therefore, there may be good  
47 arguments for reintroducing pure night shift teams. Moreover, if night shifts are 12 hours  
48 long, the alienation mentioned by managers may be reduced, because the night shift nurses  
49 arrive earlier in the evenings to start their shift and therefore participate in some of the same  
50  
51  
52  
53  
54  
55  
56  
57  
58  
59  
60

1  
2  
3 activities as nurses working the evening shift. On the other hand, some nurses did not want to  
4  
5 change from a two-shift system to a three-shift system. This may be explained in part by a  
6  
7 recent study of combined in-field and laboratory experiments that concluded that chronic  
8  
9 shift work causes night shift intolerance.[20]  
10  
11

### 12 13 *An overall evaluation* 14

15  
16 We agree with Ferguson and Dawson (2012),[21] who concluded that there is no simple  
17  
18 “yes or no” answer to the choice between 12-hour versus 8-hour shifts. They argued that the  
19  
20 answer depends on the context, including the work tasks, workforce, and workplace.  
21  
22 However, we wish to add another dimension: individual preferences.  
23  
24

25  
26 Individual nurses’ preferences are heterogeneous even within the same unit. It is not easy  
27  
28 to obtain a clear picture of the diversity of preferences using quantitative methods. Moreover,  
29  
30 a given individual’s preference will change over time as her or his family and health situation  
31  
32 evolves, and depending on the situation at work. Therefore, no universal decision about shift  
33  
34 length preferences is possible; rather, continuous dynamic assessment of the most suitable  
35  
36 shift length and rotation scheme for each employee is needed, if the aim is to reduce the  
37  
38 adverse outcomes of shift work.  
39  
40

41  
42 The scoping review by Harris et al. (2015)[22] suggests that there may always be  
43  
44 insufficient evidence to justify either the widespread implementation or the withdrawal of 12-  
45  
46 hour shifts for nurses. They concluded that the real benefits, and whether there are real and  
47  
48 unacceptable risks to patients and staff, are unknown. They also noted that more research is  
49  
50 needed to understand the long-term effects, as opposed to more easily measured short-term  
51  
52 effects.  
53  
54

55  
56 We suggest that the mixed results in previous studies reflect the fact that there is simply  
57  
58 no universally correct answer to this question, because of the differences in context but also  
59  
60

1  
2  
3 the heterogeneity and dynamic nature of individual preferences and tolerance. We argue that  
4  
5 the observed diversity of expectations and experiences, and the strength of different nurses'  
6  
7 contrasting preferences about long shifts, indicate that 12-hour shifts should be completely  
8  
9 voluntary, rather than being either mandated or banned as a universal policy.  
10  
11  
12

### 13 14 **5. Strengths and limitations**

15  
16  
17 A key strength of this study is its longitudinal design. The nurses trialled 12-hour shifts  
18  
19 for 1 year, and their perspectives were obtained over an 18-month period that captured the  
20  
21 nurses' views before, during, and after the intervention. Another strength is the richness and  
22  
23 authenticity of individual experiences that can be revealed by a qualitative methodology  
24  
25 based on a relatively unstructured interview format.  
26  
27

28  
29 A key limitation is the small sample size of 24 nurses. However, given that our qualitative  
30  
31 research design based on interviews was unsuitable for very large sample sizes, a more  
32  
33 important limitation is that we excluded nurses who did not wish to trial the 12-hour shifts. It  
34  
35 is possible this study underestimates the risk of adverse outcomes from 12-hour shifts, as  
36  
37 nurses who knew they would be susceptible to such outcomes likely chose not to participate.  
38  
39 This aspect of the study design was determined by ethical considerations: as it would be  
40  
41 highly unethical to force someone to work 12-hour shifts against their will, a requirement for  
42  
43 study approval was that the 12-hour shifts would be voluntary. Additionally, we suspect that  
44  
45 negative health consequences of working 12-hour shifts were underreported by the  
46  
47 participants, as many wanted the trial to succeed so they could work only every fourth  
48  
49 weekend instead of every third weekend.  
50  
51  
52  
53  
54  
55  
56  
57  
58  
59  
60

## 6. Conclusion

This study revealed the diversity of nurses' preferences for working 12-hour shifts. While the experience of working 12-hour shifts was positive for most of the participating nurses in our study, it was not universally preferred. We suggest that individual preference for working 12-hour shifts is a function of own health situation, family situation, work load tolerance, degree of sleep problems, personality and other factors.

Based on these findings, we recommend that working 12-hour shifts in public hospitals should be voluntary. Pushing nurses into working long shifts against their will could negatively affect their health, job satisfaction, and general life quality, and drive them away from the profession.

### a. Contributorship statement

HF and SOO wrote the project proposal and obtained funding. SOO, MST and SLK conducted the interviews. MST, SLK and SOO coded all the interviews based on a code-list developed by the team of all authors. SOO drafted the manuscript and the other authors contributed significantly to the final version.

### b. Competing interests

The authors declare that they have no conflict of interest.

### c. Funding

This project was funded mainly by the Research Council of Norway. The main hospital employer organisation (SPEKTER), the nurses' union (NSF), and the nursing assistants' union (Fagforbundet) financed the same yearly amount covering in total one-fifth of the

1  
2  
3 project's total cost. None of the funding bodies read the manuscript or had any influence on  
4  
5 the results.  
6  
7  
8  
9

#### 10 d. Data sharing statement

11 All interviews were recorded and converted to text files. The text files are in Norwegian and  
12  
13 can be made available upon request. The interview guide can also be made available upon  
14  
15 request. Written informed consent was obtained from all participants.  
16  
17  
18  
19  
20  
21  
22

## 23 References

- 24  
25  
26 [1] Admi, H., Tzischinsky, O., Epstein, R., Herer, P., Lavie, P. 2008. Shift work in nursing: is it really  
27  
28 a risk factor for nurses' health and patients' safety? *Nurs. Econ.* 26, 250–257.  
29  
30 [2] Dall'Ora, C., Griffiths, P., Ball, J., Simon, M., H Aiken, L.H. 2015. Association of 12-h shifts and  
31  
32 nurses' job satisfaction, burnout and intention to leave: findings from a cross-sectional study of  
33  
34 12 European countries. *BMJ Open* 5, e008331. doi: 10.1136/bmjopen-2015-008331.  
35  
36 [3] Estabrooks, C.A., Cummings, G.G., Olivo, S.A., Squires, J.E., Giblin, C., Simpson, N. 2009.  
37  
38 Effects of shift length on quality of patient care and health provider outcomes: systematic review.  
39  
40 *Qual. Saf. Health Care* 18, 181–188.  
41  
42 [4] Bae, S.-H., Fabry, D. 2014. Assessing the relationships between nurse work hours/overtime and  
43  
44 nurse and patient outcomes: systematic literature review. *Nurs. Outlook* 62, 138–156.  
45  
46 [5] Clendon, J. and V. Gibbons (2015). 12h shifts and rates of error among nurses: A systematic  
47  
48 review. *International Journal of Nursing Studies* 52(7): 1231-1242.  
49  
50 [6] Wagstaff, A.S., Lie, J.-A.S. 2011. Shift and night work and long working hours-a systematic  
51  
52 review of safety implications. *Scand. J. Work Environ. Health* 37, 173–185.  
53  
54 [7] Banakhar, M. 2017. The impact of 12-hour shifts on nurses' health, wellbeing, and job  
55  
56 satisfaction: A systematic review. *J. Nurs. Educ. Pract.* 7, 69.  
57  
58  
59  
60

- 1  
2  
3 [8] Iskera-golec, I., Folkard, S., Marek, T., Noworol, C. 1996. Health, well-being and burnout of ICU  
4 nurses on 12-and 8-h shifts. *Work Stress* 10, 251–256.  
5  
6  
7 [9] Chen, J., Davis, K.G., Daraiseh, N.M., Pan, W., Davis, L.S. 2014. Fatigue and recovery in 12-hour  
8 dayshift hospital nurses. *J. Nurs. Manag.* 22, 593–603.  
9  
10  
11 [10] Geiger-Brown, J., Rogers, V.E., Trinkoff, A.M., Kane, R.L., Bausell, R.B., Scharf, S.M. 2012.  
12 Sleep, sleepiness, fatigue, and performance of 12-hour-shift nurses. *Chronobiol. Int.* 29, 211–219.  
13  
14  
15 [11] Stone, P.W., Du, Y., Cowell, R., Amsterdam, N., Helfrich, T.A., Linn, R.W., Gladstein, A.,  
16 Walsh, M., Mojica, L.A. 2006. Comparison of nurse, system and quality patient care outcomes in  
17 8-hour and 12-hour shifts. *Med. Care* 44, 1099–1106.  
18  
19  
20 [12] Battle, C. and P. Temblett (2018). "12-Hour nursing shifts in critical care: A service evaluation."  
21 *Journal of the Intensive Care Society*: 1751143717748094.  
22  
23  
24 [13] Gupta, N., Diallo, K., Zurn P., Dal Poz, M.R. 2003. Assessing human resources for health: what  
25 can be learned from labour force surveys? *Hum. Resour. Health* 1, 5.  
26  
27  
28 [14] OECD. 2014. *OECD Reviews of Health Care Quality: Norway 2014*. OECD Publishing, Paris.  
29  
30  
31 [15] Ose, S.O. 2016. Using Excel and Word to structure qualitative data. *J. Appl. Soc. Sci.* 10, 147–  
32 162.  
33  
34  
35 [16] Kundi, M., Koller, M., Stefan, H., Lehner, L., Kaindlstorfer, S., Rottenbacher, S. 1995. Attitudes  
36 of nurses towards 8-h and 12-h shift systems. *Work Stress* 9, 134–139.  
37  
38  
39 [17] Scott, L.D., Rogers, A.E., Hwang, W.-T., Zhang, Y. 2006. Effects of critical care nurses' work  
40 hours on vigilance and patients' safety. *Am. J. Crit. Care* 15, 30–37.  
41  
42  
43 [18] Virtanen, M., Kurvinen, T., Terho, K., Oksanen, T., Peltonen, R., Vahtera, J., Routamaa, M.,  
44 Elovainio, M., M. Kivimaki, M. 2009. Work hours, work stress, and collaboration among ward  
45 staff in relation to risk of hospital-associated infection among patients. *Med. Care* 47, 310–318.  
46  
47  
48 [19] Wilson, M., Permito, R., English, A., Albritton, S., Coogle, C., Van Dongen, H.P.A. 2017.  
49 Performance and sleepiness in nurses working 12-h day shifts or night shifts in a community  
50 hospital. *Accid. Anal. Prev.*  
51  
52  
53  
54  
55  
56  
57  
58  
59  
60



1  
2  
3 [20] Li, P., Morris, C.J., Patxot, M., Yugay, T., Mistretta, J., Purvis, T.E., Scheer, F.A.J.L., Hu, K.  
4

5 2017. Reduced tolerance to night shift in chronic shift workers: insight from fractal regulation.  
6

7 Sleep 40, 1 July 2017. doi: 10.1093/sleep/zsx092.  
8

9 [21] Ferguson, S.A., Dawson, D. 2012. 12-h or 8-h shifts? It depends. Sleep Med. Rev. 16, 519–528.  
10

11 [22] Harris, R., Sims, S., Parr, J., Davies, N. 2015. Impact of 12-hour shift patterns in nursing: a  
12

13 scoping review. Int. J. Nurs. Stud. 52, 605–634.  
14  
15  
16  
17  
18  
19  
20  
21  
22  
23  
24  
25  
26  
27  
28  
29  
30  
31  
32  
33  
34  
35  
36  
37  
38  
39  
40  
41  
42  
43  
44  
45  
46  
47  
48  
49  
50  
51  
52  
53  
54  
55  
56  
57  
58  
59  
60

For peer review only

## Standards for Reporting Qualitative Research (SRQR)\*

<http://www.equator-network.org/reporting-guidelines/srqr/>

Page/line no(s).

### Title and abstract

|                                                                                                                                                                                                                                                              |                |
|--------------------------------------------------------------------------------------------------------------------------------------------------------------------------------------------------------------------------------------------------------------|----------------|
| <p><b>Title</b> - Concise description of the nature and topic of the study Identifying the study as qualitative or indicating the approach (e.g., ethnography, grounded theory) or data collection methods (e.g., interview, focus group) is recommended</p> | 1/ 1-3         |
| <p><b>Abstract</b> - Summary of key elements of the study using the abstract format of the intended publication; typically includes background, purpose, methods, results, and conclusions</p>                                                               | 2/1-25 & 3/1-2 |

### Introduction

|                                                                                                                                                                     |        |
|---------------------------------------------------------------------------------------------------------------------------------------------------------------------|--------|
| <p><b>Problem formulation</b> - Description and significance of the problem/phenomenon studied; review of relevant theory and empirical work; problem statement</p> | 7/8-15 |
| <p><b>Purpose or research question</b> - Purpose of the study and specific objectives or questions</p>                                                              | 7/16   |

### Methods

|                                                                                                                                                                                                                                                                                                                                                                                                             |                 |
|-------------------------------------------------------------------------------------------------------------------------------------------------------------------------------------------------------------------------------------------------------------------------------------------------------------------------------------------------------------------------------------------------------------|-----------------|
| <p><b>Qualitative approach and research paradigm</b> - Qualitative approach (e.g., ethnography, grounded theory, case study, phenomenology, narrative research) and guiding theory if appropriate; identifying the research paradigm (e.g., postpositivist, constructivist/ interpretivist) is also recommended; rationale**</p>                                                                            | 11/2-20         |
| <p><b>Researcher characteristics and reflexivity</b> - Researchers' characteristics that may influence the research, including personal attributes, qualifications/experience, relationship with participants, assumptions, and/or presuppositions; potential or actual interaction between researchers' characteristics and the research questions, approach, methods, results, and/or transferability</p> | 11/8-20         |
| <p><b>Context</b> - Setting/site and salient contextual factors; rationale**</p>                                                                                                                                                                                                                                                                                                                            | 8/2-22 & 9/2-11 |
| <p><b>Sampling strategy</b> - How and why research participants, documents, or events were selected; criteria for deciding when no further sampling was necessary (e.g., sampling saturation); rationale**</p>                                                                                                                                                                                              | 9/13-23         |
| <p><b>Ethical issues pertaining to human subjects</b> - Documentation of approval by an appropriate ethics review board and participant consent, or explanation for lack thereof; other confidentiality and data security issues</p>                                                                                                                                                                        | 12/1-2          |
| <p><b>Data collection methods</b> - Types of data collected; details of data collection procedures including (as appropriate) start and stop dates of data collection and analysis, iterative process, triangulation of sources/methods, and modification of procedures in response to evolving study findings; rationale**</p>                                                                             | 10/16-22        |

|                       |                                                                                                                                                                                                                                                       |          |
|-----------------------|-------------------------------------------------------------------------------------------------------------------------------------------------------------------------------------------------------------------------------------------------------|----------|
| 1<br>2<br>3<br>4<br>5 | <b>Data collection instruments and technologies</b> - Description of instruments (e.g., interview guides, questionnaires) and devices (e.g., audio recorders) used for data collection; if/how the instrument(s) changed over the course of the study | 10/16-17 |
| 6<br>7<br>8           | <b>Units of study</b> - Number and relevant characteristics of participants, documents, or events included in the study; level of participation (could be reported in results)                                                                        | 10/16-22 |
| 9<br>10<br>11<br>12   | <b>Data processing</b> - Methods for processing data prior to and during analysis, including transcription, data entry, data management and security, verification of data integrity, data coding, and anonymization/de-identification of excerpts    | 11/2-20  |
| 13<br>14<br>15<br>16  | <b>Data analysis</b> - Process by which inferences, themes, etc., were identified and developed, including the researchers involved in data analysis; usually references a specific paradigm or approach; rationale**                                 | 11/2-20  |
| 17<br>18<br>19<br>20  | <b>Techniques to enhance trustworthiness</b> - Techniques to enhance trustworthiness and credibility of data analysis (e.g., member checking, audit trail, triangulation); rationale**                                                                | 11/2-20  |

### Results/findings

|                            |                                                                                                                                                                                                   |                                               |
|----------------------------|---------------------------------------------------------------------------------------------------------------------------------------------------------------------------------------------------|-----------------------------------------------|
| 23<br>24<br>25<br>26       | <b>Synthesis and interpretation</b> - Main findings (e.g., interpretations, inferences, and themes); might include development of a theory or model, or integration with prior research or theory | Not relevant in this study                    |
| 27<br>28<br>29<br>30<br>31 | <b>Links to empirical data</b> - Evidence (e.g., quotes, field notes, text excerpts, photographs) to substantiate analytic findings                                                               | Quotes used extensively in the result chapter |

### Discussion

|                                        |                                                                                                                                                                                                                                                                                                                                                                                                             |          |
|----------------------------------------|-------------------------------------------------------------------------------------------------------------------------------------------------------------------------------------------------------------------------------------------------------------------------------------------------------------------------------------------------------------------------------------------------------------|----------|
| 34<br>35<br>36<br>37<br>38<br>39<br>40 | <b>Integration with prior work, implications, transferability, and contribution(s) to the field</b> - Short summary of main findings; explanation of how findings and conclusions connect to, support, elaborate on, or challenge conclusions of earlier scholarship; discussion of scope of application/generalizability; identification of unique contribution(s) to scholarship in a discipline or field | 34/22-24 |
| 41<br>42                               | <b>Limitations</b> - Trustworthiness and limitations of findings                                                                                                                                                                                                                                                                                                                                            | 35/3-13  |

### Other

|                |                                                                                                                                               |         |
|----------------|-----------------------------------------------------------------------------------------------------------------------------------------------|---------|
| 44<br>45<br>46 | <b>Conflicts of interest</b> - Potential sources of influence or perceived influence on study conduct and conclusions; how these were managed | 36/5-6  |
| 47<br>48<br>49 | <b>Funding</b> - Sources of funding and other support; role of funders in data collection, interpretation, and reporting                      | 36/8-13 |

\*The authors created the SRQR by searching the literature to identify guidelines, reporting standards, and critical appraisal criteria for qualitative research; reviewing the reference lists of retrieved sources; and contacting experts to gain feedback. The SRQR aims to improve the transparency of all aspects of qualitative research by providing clear standards for reporting qualitative research.

1  
2  
3  
4  
5  
6  
7  
8  
9  
10  
11  
12  
13  
14  
15  
16  
17  
18  
19  
20  
21  
22  
23  
24  
25  
26  
27  
28  
29  
30  
31  
32  
33  
34  
35  
36  
37  
38  
39  
40  
41  
42  
43  
44  
45  
46  
47  
48  
49  
50  
51  
52  
53  
54  
55  
56  
57  
58  
59  
60

\*\*The rationale should briefly discuss the justification for choosing that theory, approach, method, or technique rather than other options available, the assumptions and limitations implicit in those choices, and how those choices influence study conclusions and transferability. As appropriate, the rationale for several items might be discussed together.

**Reference:**

O'Brien BC, Harris IB, Beckman TJ, Reed DA, Cook DA. **Standards for reporting qualitative research: a synthesis of recommendations.** *Academic Medicine*, Vol. 89, No. 9 / Sept 2014  
DOI: 10.1097/ACM.0000000000000388

For peer review only

# BMJ Open

## One-year trial of 12-hour shifts in a non-intensive care unit and an intensive care unit in a public hospital: A qualitative study of 24 nurses' experiences

|                                 |                                                                                                                          |
|---------------------------------|--------------------------------------------------------------------------------------------------------------------------|
| Journal:                        | <i>BMJ Open</i>                                                                                                          |
| Manuscript ID                   | bmjopen-2018-024292.R3                                                                                                   |
| Article Type:                   | Research                                                                                                                 |
| Date Submitted by the Author:   | 05-Mar-2019                                                                                                              |
| Complete List of Authors:       | Ose, Solveig Osborg; SINTEF, Tjønnås, Maria; SINTEF, Health Kaspersen, Silje Lill; SINTEF, Health Færevik, Hilde; SINTEF |
| <b>Primary Subject Heading</b>: | Qualitative research                                                                                                     |
| Secondary Subject Heading:      | Health services research                                                                                                 |
| Keywords:                       | hospital, nurse, nursing workforce, 12-hours shifts, shift work, long shift tolerance                                    |
|                                 |                                                                                                                          |

SCHOLARONE™  
Manuscripts

1  
2  
3 **One-year trial of 12-hour shifts in a non-intensive care unit and**  
4  
5  
6 **an intensive care unit in a public hospital: A qualitative study of**  
7  
8  
9 **24 nurses' experiences**  
10  
11

12 Short title: One-year trial of 12-hour shifts in a non-intensive care hospital unit and an  
13  
14 intensive care unit  
15  
16

17  
18  
19  
20 **Corresponding author:**  
21

22 Solveig Osborg Ose  
23

24 E-mail: Solveig.ose@sintef.no  
25

26 Address: SINTEF Technology and Society, Dep. of Health,  
27

28 Postboks 4760 Torgarden, 7465 TRONDHEIM  
29

30 Phone: (+47) 907 28 684  
31  
32  
33

34  
35 *Maria Suong Tjønnås*  
36

37 SINTEF Technology & Society, Dep. of Health, Trondheim, Norway  
38  
39

40 *Silje L. Kaspersen*  
41

42 SINTEF Technology & Society, Dep. of Health, Trondheim, Norway  
43  
44

45 *Hilde Færevik*  
46

47 SINTEF Technology & Society, Dep. of Health, Trondheim, Norway  
48  
49  
50  
51  
52  
53  
54  
55  
56  
57  
58  
59  
60

## Abstract

*Objectives:* The aim of this study was to provide recommendations to hospital owners and employee unions about developing efficient, sustainable, and safe work-hour agreements.

Employees at two clinics of a hospital, one a non-intensive care and the other a newborn intensive care unit, trialled 12-hour shifts on weekends for one year.

*Methods:* We systematically recorded the experiences of 24 nurses working 12-hour shifts, 16 in the medical unit and eight in the intensive care unit for one year. All were interviewed before, during, and at the end of the trial period. The interview material was recorded, transcribed to text, and coded systematically.

*Results:* The experiences of working 12-hour shifts differed considerably between participants, especially those in the intensive care unit. Their individual experiences differed in terms of health consequences, effects on their family, appreciation of extra weekends off, perceived effects on patients, and perceived work task flexibility.

*Conclusions:* The results indicate that individual preference for working 12-hour shifts is a function of own health situation, family situation, work load tolerance, degree of sleep problems, personality and other factors. If the goal is to recruit and retain nurses, nurses should be free to choose to work 12-hour shifts.

*Keywords:*

Hospital, nurse, nursing workforce, 12-hours shifts, shift work, long shift tolerance

## Article summary

### Strengths and limitations of this study:

- A key strength of this study is its longitudinal design.
- The nurses trialled 12-hour shifts for 1 year, and their perspectives were obtained over an 18-month period that captured the nurses' views before, during, and after the intervention.
- Another strength is the richness and authenticity of individual experiences that can be revealed by a qualitative methodology based on a relatively unstructured interview format.
- The study shows the heterogeneity of nurses' preferences for and ability to tolerate 12-hour shifts.
- A requirement for study approval was that the 12-hour shifts would be voluntary. It is possible this study underestimates the risk of adverse outcomes from 12-hour shifts, as nurses who knew they would be susceptible to such outcomes likely chose not to participate.

## 1. Introduction

Hospitals are round-the-clock service providers, requiring staff that contribute to the efficient use of capital investments on days, nights, and weekends. However, there is evidence of adverse physiological and psychological effects from shift work, including disruption to the biological rhythm, sleep disorders, health problems, diminished performance at work, job dissatisfaction, and social isolation.[1] The needs of hospital owners/managers and hospital employees are not always compatible, which can give rise to conflicts, work strikes, and unions demanding a stronger voice in staffing decisions and working time arrangements.



1  
2  
3 One of the suggested solutions has been to introduce 12-hour shifts, which are becoming  
4 increasingly common for hospital nurses.[2] Hospital management may prefer 12-hour shifts  
5 instead of 8-hour shifts because longer shifts require fewer handovers and less overlap  
6 between shifts. Employees may prefer longer shifts to compress their work into fewer days.  
7  
8 However, research has identified a wide range of associations between 12-hour shift work  
9 and negative outcomes for hospital nurses.  
10  
11  
12  
13  
14  
15  
16

17 A systematic literature review of the effects of shift length in healthcare settings found  
18 that few studies were of moderate or high methodological quality, and that the results were  
19 difficult to compare because there is no standard measure of outcomes such as the quality of  
20 patient care.[3] A newer systematic literature review concluded that there is strong evidence  
21 of a positive relationship between long working hours and adverse outcomes in nurses, but  
22 that more evidence is needed to determine the relationship to adverse patient outcomes.[4]  
23  
24 Another systematic review concluded that the risk of making an error appears higher among  
25 nurses working 12-hour or longer on a single shift in acute care hospitals.[5] One systematic  
26 review of the safety implications of long work hours concluded that shifts longer than 8 hours  
27 are associated with a cumulative increase in the risk of accidents; for example, the risk of  
28 accidents after 12 hours is twice that after 8 hours of work.[6] The authors of a recent  
29 systematic literature review suggest that 12-hour shifts may cause health problems and job  
30 dissatisfaction, but that this must be confirmed by more empirical evidence.[7] We do not  
31 find other systematic reviews of hospital nurses working 12-hour shifts. Some cross-sectional  
32 studies report negative experiences from working 12-hour shift compared to 8-hour shifts,[8,  
33 9, 10] while other studies report positive experiences[11] or no risk.[12] One comprehensive  
34 study based on a cross-sectional survey of 31 627 registered nurses in 2 170 general  
35 medical/surgical units within 488 hospitals across 12 European countries concluded that  
36 longer working hours are associated with adverse outcomes for hospital nurses, and that some  
37  
38  
39  
40  
41  
42  
43  
44  
45  
46  
47  
48  
49  
50  
51  
52  
53  
54  
55  
56  
57  
58  
59  
60

1  
2  
3 of these adverse outcomes, such as high burnout rates, may pose safety risks for both patients  
4 and nurses.[2]  
5  
6

7  
8 The topic of shift length is complex, and the results are not consistent across studies. The  
9  
10 mixed results of studies of the effects of 12-hour versus 8-hour shifts in hospitals make it  
11  
12 difficult for both employers and employees to make evidence-based decisions.  
13

14  
15 In the Norwegian democratic welfare state, public authorities are responsible for  
16  
17 providing and financing health services. The responsibility for specialist care lies with the  
18  
19 state (administered by four regional health authorities). The four regions have a total of 39  
20  
21 public hospitals and about 10 small private hospitals funded through contracts with the  
22  
23 regional health authorities. The proportion of health professionals in the labour force is high  
24  
25 in Norway compared with other high- and middle-income countries,[13] and the quality of  
26  
27 health services is high.[14] The Conservative Party, in power since 2013, argued that long  
28  
29 shifts in the health sector may be positive for both patients and employees. In 2015, changes  
30  
31 to the Norwegian legislation on working hours in the health sector enabled employers and  
32  
33 employees to implement long shifts without the approval of the National Labour Inspection  
34  
35 Authority. Employers were now allowed to make deals with local unions permitting daily  
36  
37 work of up to 12.5 hours. Working hours is an important area of conflicts between the nurses'  
38  
39 union (NSF) and hospital employer organisation (SPEKTER) in recent years.  
40  
41  
42  
43

44  
45 In this study, we aimed to perform a thorough qualitative study, to understand nurses'  
46  
47 experiences and perceptions of working 12-hour shifts compared with the usual 8-hour shifts.  
48  
49 To our knowledge, no qualitative study has followed nurses working 12-hour shifts over a  
50  
51 longer period. A qualitative longitudinal study may contribute to a better understanding of the  
52  
53 mixed associations found in previous cross-sectional quantitative studies and may provide  
54  
55 results with clearer policy implications.  
56  
57  
58  
59  
60

1  
2  
3 The aim of this study was to understand the nurses' individual experiences. The  
4 objectives of the study were to (1) identify a hospital with plans for implementing 12-hour  
5 shifts, (2) recruit nurses who wants to share their experiences of working 12-hour shifts, (3)  
6 interview the recruited nurses before, during and after the trial period, (4) transcribe all  
7 interviews and conduct a systematic analyse of the data using applied social science research  
8 methods.  
9  
10  
11  
12  
13  
14  
15  
16  
17  
18  
19

## 20 **2. Methods**

### 21 *2.3. Study setting and design*

22  
23  
24  
25  
26 The hospital included in the study was a hospital in Norway. Two units were included:  
27 one gastrointestinal surgery ward (non-ICU), and a highly specialised newborn intensive care  
28 unit (ICU). There were no male nurses working at either unit.  
29  
30  
31  
32

33 The trial was planned and conducted by the hospital while the qualitative study following  
34 the trial was performed by external researchers funded by the Norwegian Research Council  
35 and the social partners.  
36  
37  
38  
39

40 The qualitative study following the trial was planned together with managers and  
41 employees in the two units. The employees did not want to work 12-hour shifts on weekdays,  
42 because of concerns about patient treatment on the busier weekdays. The managers initially  
43 agreed to trial 12-hour shifts on weekends for 6 months, but this was extended to one year in  
44 both units. Only nurses were included in the study, not doctors or other personnel. Thirty  
45 nurses in the non-ICU and 12 in the ICU volunteered to try the 12-hour shifts, of whom 16  
46 and eight, respectively, chose to participate in the qualitative study. They all agreed to be  
47 interviewed once before the trial started, during the trial, and after the trial ended. Most of the  
48  
49  
50  
51  
52  
53  
54  
55  
56  
57  
58  
59  
60

1  
2  
3 individual interviews were conducted during a shift, but some interviews were difficult to  
4  
5 organise within work hours and were conducted during the nurse's leisure time.  
6  
7

#### 8 9 *2.4. Preparation*

10  
11 Before the two units started the trial, the managers and employees agreed on a shift  
12 system with certain number of rest breaks during the 12-hours shifts and that only two 12-  
13 hour shifts should be worked per weekend (Friday included a regular 8-hour shift) and that  
14 the nurses would have the day before and the day after the work weekend off. They decided  
15 that the 12-hours shift should include 90 minutes rest breaks. The non-ICU decided to have  
16 one break lasting one hour and then a 30-minute break while the ICU decided to have 3  
17 breaks each lasting 30 minutes.  
18  
19

20  
21 Participation was voluntary, and employees were formally informed about what  
22 participation implied in a meeting with the researchers. Nurses with a history of high sickness  
23 absence were excluded from the trial, as the managers were concerned that 12-hour shifts  
24 would be too demanding for them and pose a risk to the trial. A pre-trial meeting was also  
25 held in which the managers, union representatives, and researchers discussed the trial and  
26 study with representatives from the National Labour Inspection Authority.  
27  
28

29  
30 The ICU started their trial period on 5 September 2015; the non-ICU, on 1 April 2016.  
31  
32

#### 33 34 35 36 37 38 39 40 41 42 43 44 45 *2.5. Data collection*

46  
47 The recruited nurses were interviewed before, during and after the trial period. Three  
48 semi-structured interview guides were developed by the research team to cover the situations  
49 before, during, and after the trial. The pre-trial interviews lasted 1 to 1.5 hours, the in-trial  
50 interviews lasted ~1 hour, and the post-trial interviews lasted 30–40 minutes. All participants  
51 provided written consent at the pre-trial interview. Seventy interviews were conducted by  
52 three researchers, as two participants were lost to follow up due to job change. The interviews  
53  
54  
55  
56  
57  
58  
59  
60

1  
2  
3 were conducted in the Norwegian language. The 18-month data collection period was August  
4  
5 2015 to January 2017. All interviews were audiotaped and transcribed verbatim.  
6  
7

## 8 9 *2.6. Emergent themes*

10  
11  
12 Projects that involve many interviews produce a vast amount of data or text that is  
13  
14 difficult to structure and analyse systematically. A 10-step method has been developed to  
15  
16 code and structure text using Microsoft Word and Excel.[15] This 10-step method produces a  
17  
18 flexible Word document of interview data separated into logical chapters and subchapters.  
19  
20 All text is coded, and the codes correspond to headings in the final document. Systematic  
21  
22 manual coding ensures that all the content is coded, not just words or terms extracted from  
23  
24 the text. In this study, 140 codes were used. Examples of codes are “work environment”,  
25  
26 “organisation of rotation plans”, “experiences during the 12-hour shifts”, and “family  
27  
28 consequences of 12-hour shifts”. The multidisciplinary team that conducted the interviews  
29  
30 coded all interviews. We developed the code list together at the beginning of the coding  
31  
32 process, coded the same interviews, and revised the code list several times during the process.  
33  
34 All transcribed interviews were fully coded (i.e., all transcribed text was assigned a code). In  
35  
36 this study, we analysed data under the main heading of “12-hour shifts”. The remaining data  
37  
38 provide information about the hospital and unit context. This information is not used  
39  
40 explicitly in this study. Using the 10-step method, we identified the following main topics for  
41  
42 the analysis: “pre-trial expectations of working 12-hour shifts on weekends”, “organising and  
43  
44 implementing the 12-hour shift schedule”, “consequences of working 12-hour shifts” (with  
45  
46 subheadings “positive/negative effects during the shift”, “positive/negative effects during the  
47  
48 off-shift periods”, “sleep”, “quality of treatment”, “health problems”, etc.), “decision after the  
49  
50 end of the trial period”, and “individual overall assessment”. The results section is organised  
51  
52  
53  
54  
55  
56  
57  
58  
59  
60

1  
2  
3 under these headings. We have included quotations that reflect the themes that emerged from  
4  
5 the systematic coding process.  
6  
7

### 8 9 *2.7. Patient and Public Involvement statement.*

10  
11 This health services research study includes employed public hospital nurses. Both the  
12  
13 employer organisation and the nurses' union were involved from the beginning of the project  
14  
15 to the end.  
16  
17

### 18 19 *2.8. Ethics*

20  
21 This study was approved by the Regional Committees for Medical and Health Research  
22  
23 Ethics in Mid-Norway (REC) (reference number 2014/2017).  
24  
25  
26  
27  
28

## 29 30 **3. Results**

31  
32 The difference in the type of care at the two units was reflected in the staff experience and  
33  
34 education levels: the non-ICU had many young nurses who had not completed any  
35  
36 specialised training, and it had relatively high turnover; the ICU had more-experienced staff,  
37  
38 most of whom had a specialisation. The non-ICU had ~60 nurses; the ICU, ~120 nurses.  
39  
40 Most nurses at both units worked a rotating three-shift schedule (day, evening, night), but  
41  
42 some worked exclusively days or evenings, and others only overnight shifts. Patients stayed  
43  
44 from 1 day to several months in both units.  
45  
46  
47  
48

### 49 50 *3.1. Expectations before starting the 12-hour shifts*

51  
52 All participants expressed their excitement about starting 12-hour shifts. Participants were  
53  
54 asked, "What do you expect will happen when you start working 12-hour shifts on the  
55  
56 weekends?" without any explicit cues. We have organised the answers into topics according  
57  
58 to the how the responses were coded.  
59  
60

### 3.1.1. Not much difference from the current situation

Some of the nurses in both units thought it was difficult to have any expectations because the work load was generally unpredictable. Some periods were very busy, with many severely ill patients, whereas other periods were less busy. The nurses in the non-ICU thought that the long shifts might occur during peak periods, and some expressed concerns about this.

*It can be very busy here, so it [working 12-hour shifts] will be difficult because you do not have time to be tired during a busy day shift. At night, when you are tired because it's night time, a busy shift will be very tough (Nurse 14, non-ICU, pre-trial interview).*

Many of the nurses in the ICU were used to working double shifts, and they did not expect the 12-hour shifts to be more difficult.

### 3.1.2. More tired

Most of the respondents expected to be more tired after a weekend working 12-hour shifts compared with a weekend working 8-hour shifts (i.e., 8 hours more than usual for a day-shift weekend):

*I think I'll be very tired from working that weekend. It is good that we'll have the Monday after off, so we can get our strength back before starting the next shift (Nurse 13, non-ICU, pre-trial interview).*

When we asked whether they were tired after a regular 8-hour shift, they typically answered:

*It varies a lot depending on my work tasks and the amount of pressure at the unit. But I'm tired at the end of a regular 8-hour shift if it's a busy day (Nurse 2, ICU, pre-trial interview).*

1  
2  
3 The participants in both units confirmed that they were exhausted after a busy shift.  
4  
5 However, most recovered well before the next shift, although problems obtaining sufficient  
6  
7 sleep between an evening and morning shift were common.  
8  
9

### 10 3.1.3. Nights

11  
12 Some participants worked only nights. They typically expected that the 12-hour shifts  
13  
14 would not be significantly different:  
15

16  
17 *The night shift is rather long already—it's 10 hours now. When I start doing*  
18  
19 *12-hour shifts, I will start at 7.45 pm instead of 9.30 pm. The difference is*  
20  
21 *not that big, and I'll get to have a 1-hour break during the shift. I think it will*  
22  
23 *be beneficial to start earlier in the evening (Nurse 10, non-ICU, pre-trial*  
24  
25 *interview).*  
26  
27

28  
29  
30 Those working both day and night shifts during their 12-hour shift weekends shared this  
31  
32 view about the nights.  
33

### 34 3.1.4. Health concerns

35  
36 Some respondents were not concerned about potential adverse health effects from  
37  
38 working 12-hour shifts, not because they thought such shifts would be healthy, but rather  
39  
40 because it was already difficult to work a rotating three-shift schedule. However, others did  
41  
42 express concerns:  
43  
44

45  
46 *I'm cursed with neck pain when I'm stressed. I'm wondering whether my*  
47  
48 *back and neck will handle it [to work 12-hour shifts]. But as long as I get to*  
49  
50 *take rest breaks during the shifts, I think I'll be fine (Nurse 10, non-ICU, pre-*  
51  
52 *trial interview).*  
53  
54  
55  
56  
57  
58  
59  
60



### 3.1.5. Attitude and mental preparation

Several of the respondents argued that the experience would largely depend on their attitudes: “*If you say to yourself that this is not going to work out well, it will not work out well*”. Participants in both units felt this way, but this is also related to personality:

*I don't really have any specific concerns; I usually take things as they come.*

*I'm thinking that this weekend will be about work and nothing else; it doesn't matter that there are some more hours (Nurse 16, non-ICU, pre-trial interview).*

However, some ICU nurses were not convinced that the introduction of 12-hour shifts would be that easy. They reflected on the need to prepare mentally for the long shift:

*I want to try working 12-hour shifts, but I am not sure because I haven't tried this before. Maybe I won't like it. But I think I'll have to be mentally prepared because on days when I usually finish at 3 pm, I will now have to work until 7.30 pm. (Nurse 1, ICU, pre-trial interview).*

### 3.1.6. Patient consequences

The nurses in the ICU seemed to be more concerned than the nurses in the non-ICU about potential adverse consequences for patients of nurses working longer shifts:

*I'm not sceptical...but I think we must find out whether 12-hour shifts will increase the probability of making mistakes. Will we be totally exhausted? - At the end of the shift, will we be unable to do anything? Will we be able to do the work tasks we are supposed to do? (Nurse 1, ICU, pre-trial interview)*

1  
2  
3 The staff in the newborn ICU had strong focus on quality; for example, two colleagues  
4 would always double-check medicine prescriptions (double-signing). They wondered  
5 whether they might be too tired at the end of the 12-hour shifts to sustain quality:  
6  
7  
8  
9

10  
11 *If you have a family making many demands or a newborn who needs constant*  
12 *monitoring, it will be demanding to work 12 hours with the same patient and*  
13 *family. At the end of the shift, there might be a small risk of making mistakes;*  
14 *for instance, we might overlook that the infant's condition has worsened...*  
15  
16  
17  
18  
19  
20 *(Nurse 6, ICU, pre-trial interview).*  
21  
22

### 23 **3.1.7. Effect on leisure and family life**

24  
25 Several of the respondents expressed concern about how the 12-hour shifts would affect  
26 their family life.  
27  
28  
29

30  
31 *Well, I'll have to see how this works out with the rest of my life. It's not just*  
32 *that I'll be at work for more hours, it's that this must also fit my life outside*  
33 *work (Nurse 1, ICU, pre-trial interview).*  
34  
35  
36  
37

38  
39 However, the criteria for selecting participants imply that most of the respondents had a  
40 family situation that allowed them to try the 12-hour shifts on weekends.  
41  
42

### 43 **3.1.8. Enthusiasm and resistance**

44  
45 Some had great expectations about introducing the 12-hour shifts:  
46  
47

48  
49 *My expectations are first and foremost that 12-hour shifts will be introduced*  
50 *as a permanent arrangement and that this will lead to an improved quality*  
51 *of nursing both for the newborn patients and parents (Nurse 5, ICU, pre-*  
52 *trial interview).*  
53  
54  
55  
56  
57  
58  
59  
60

1  
2  
3 Others were indifferent. When we asked about the atmosphere at the units in relation to the  
4  
5 12-hour shift trial, a typical answer was:  
6  
7

8 *Well, some of the nurses are happy to try 12-hour shifts, but others do not*  
9 *want to. But I do not think there has been any strong protest against the trial*  
10 *(Nurse 10, non-ICU, pre-trial interview).*  
11  
12  
13  
14

15  
16 Those unwilling to try 12-hour shifts typically had small children. Their colleagues who  
17  
18 chose to participate in the trial showed understanding:  
19  
20

21 *It's easy to understand if they [nurses who do not want to try 12-hour shifts]*  
22 *have kids. Working a regular 8-hour shift allows you to see your kids before*  
23 *and after work, but this is different when working 12-hour shifts: they are in*  
24 *bed when you come home and still asleep when you leave for your next shift*  
25 *(Nurse 12, non-ICU, pre-trial interview).*  
26  
27  
28  
29  
30  
31  
32  
33

### 34 3.2. Organising the 12-hour shift schedule

35  
36

37 The planning and organising of the 12-hour rotating shifts was not problematic in the  
38 non-ICU but was frustrating for those responsible for the rotation plans in the ICU. The ICU  
39 had eight nurses working 12-hour shifts on the weekends: four on day shifts and four on night  
40 shifts. In general, the rotation plans in the ICU unit were complicated. The unit divided all  
41 nurses into three groups, and every shift team within each group had to include the right  
42 formal competencies, and a specified mix of nurses with extensive experience and those with  
43 less experience. The planners had to consider adjustments because of the patient mix and for  
44 individual employees. For example, some nurses were insufficiently experienced to feel  
45 comfortable working alone with very sick infants. Others did not have the competencies to  
46 comfortably perform all the specialised roles and tasks that might be required of them during  
47  
48  
49  
50  
51  
52  
53  
54  
55  
56  
57  
58  
59  
60

1  
2  
3 a shift, based on the skills mix of their on-shift colleagues. A willingness to adjust the  
4  
5 schedule to accommodate individual employee preferences, together with meeting other  
6  
7 competency and experience profile criteria for every shift, made planning a rotating roster a  
8  
9 complex task. The addition to this complexity by having to include 12-hour shifts caused  
10  
11 frustration for the planners. However, the trial period was extended by 6 months, and the  
12  
13 planners said that planning the 12-hour shifts became easier as they gained experience.  
14  
15

### 16 17 18 3.3. Consequences of working 12-hour shifts

#### 19 20 21 3.3.1. Taking rest breaks as planned

22  
23 We asked participants whether they could take rest breaks as planned when they worked  
24  
25 12-hours instead of 8-hours shifts, and most of the respondents did not experience any  
26  
27 difficulties.  
28

29  
30 *That went as planned. One weekend, my rest break was moved half an hour,*  
31  
32 *but that was okay. It was right after an 8-hour shift started, and there were*  
33  
34 *too few experienced nurses on duty, so I felt I couldn't take my break exactly*  
35  
36 *when planned. But otherwise, I think we could all take the planned rests and*  
37  
38 *pauses (Nurse 1, ICU, in-trial interview).*  
39  
40  
41  
42

43 The non-ICU had a room with a bed for the nurses' use, for napping and relaxing for 1  
44  
45 hour when working 12-hour shifts. Their experience with this was positive.  
46

47  
48 *That [the bed in a designated room] was very comfortable. Nobody called*  
49  
50 *me on my phone and no one came into the room. The others respected this*  
51  
52 *hour [for rest], and the threshold for knocking at that door was high (Nurse*  
53  
54 *1, non-ICU, in-trial interview).*  
55  
56  
57

58 However, not all respondents had good experiences trying to nap during their shift:  
59  
60

1  
2  
3 *Well, I slept once or twice during my 1-hour break during the night shift. But*  
4 *when I woke up I was feeling queasy. I was very tired when I woke up and*  
5 *felt off-balance. So, I have stopped napping during the 12-hour night shift*  
6 *(Nurse 10, non-ICU, in-trial interview).*  
7  
8  
9  
10  
11  
12

13 We asked how she spent that hour during the following 12-hour night shifts  
14 afterwards. She answered:  
15

16  
17  
18 *I can lie down for a little while, but I keep the lights on. I can listen to music*  
19 *or watch TV on my mobile (Nurse 10, non-ICU, in-trial interview).*  
20  
21  
22  
23

24 Some created their own mix of activities during the 1-hour break at night:  
25

26  
27 *In my break during the night, first I sleep half an hour and then I watch a*  
28 *film or an episode from a TV show. The first few times, I slept for the whole*  
29 *hour, but I was unwell when I woke up, and I couldn't sleep when I got home.*  
30 *After I started with half an hour of sleep and half an hour watching*  
31 *something, I felt much better (Nurse 13, non-ICU, in-trial interview).*  
32  
33  
34  
35  
36  
37  
38

39 Another nurse working in the non-ICU described her experience:  
40

41  
42 *I'm a bit queasy at first when I wake up, but I'm okay once I get on my feet.*  
43 *I think it is safer to have this nap because I have to drive home after the night*  
44 *shift (Nurse 11, non-ICU, in-trial interview).*  
45  
46  
47  
48  
49

50 One of the respondents had a more determined approach to sleeping:  
51

52  
53 *Yes, I was able to get some sleep during both the day shifts and the night*  
54 *shifts. I have become quite good at power napping, and I had decided that I*  
55  
56  
57  
58  
59  
60

1  
2  
3 *wanted to be good at that. I was not very good at it before, but now I can do*  
4  
5 *it. I fall asleep quite simply now (Nurse 7, non-ICU, in-trial interview).*  
6  
7

8  
9 Some of the nurses went outside during their break for fresh air, especially if the weather  
10 was pleasant. Others rested before their shift, saying that they did not need to sleep, but it still  
11 felt good to lie down and relax, and to think about something other than work.  
12  
13

14  
15 However, working in a hospital entails a level of uncertainty, and many unplanned events  
16 during the shift can make it impossible to take the planned rest breaks.  
17  
18

19  
20  
21 *Last weekend, on the first night, I had two emergency patients who were very*  
22 *ill. There was much uncertainty about whether they had to be operated on*  
23 *during the night. In addition to these two, I had one uneasy patient and one*  
24 *mentally ill patient who needed constant monitoring. The night after, at 1.30*  
25 *am, the alarm sounded because a patient had a cardiac arrest, and we had*  
26 *to use the defibrillator and perform chest compressions. I think it took 2.5*  
27 *hours before we got the patient to the ICU. That weekend, I did not get my*  
28 *1-hour rest break during any of the night shifts (Nurse 2, non-ICU, in-trial*  
29 *interview).*  
30  
31  
32  
33  
34  
35  
36  
37  
38  
39  
40  
41

### 42 **3.3.2. Health consequences**

43  
44 The nurses in the non-ICU discussed the health effects of working 12-hour shifts.  
45  
46 Some of the nurses did not feel any difference compared with working 8-hour shifts, but  
47 they needed the day off after the work weekend to recover. Others described different  
48  
49 negative experiences of working longer shifts than usual:  
50  
51

52  
53  
54 *At the end of the shift, I had a headache and my eyes were dry and sore from*  
55 *the dry air in the unit. I felt like I had been at work for a long time (Nurse*  
56 *15, non-ICU, in-trial interview).*  
57  
58  
59  
60

1  
2  
3 Others mentioned health problems that may have been worsened by working long shifts:  
4  
5

6 *The night-shift weekends are very demanding, but fortunately, they only*  
7 *occur every 8 weeks. The weekends with the day shifts are okay, but I have*  
8 *back problems, and my back is sore after work weekends. Maybe I should*  
9 *not work in this way, but the carrot is, of course, that I get to work every*  
10 *fourth weekend instead of every third weekend (Nurse 11, non-ICU, in-trial*  
11 *interview).*  
12  
13  
14  
15  
16  
17  
18  
19

20  
21 Most of the participants felt greater fatigue in their legs after a 12-hour shift, but some did  
22 not, despite the longer time spent standing and walking compared with an 8-hour shift. Most  
23 of the respondents described having a “tired head” after a 12-hour shift, but few reported any  
24 unexpected physical pain or health problems.  
25  
26  
27  
28  
29

30  
31 *I think it has been okay, but I get a burning sensation under my feet, and feel*  
32 *tired. And, of course, at the end of the shift on the first weekend, I really*  
33 *hoped there would be no childbirth in the evening. You think such thoughts.*  
34 *(Nurse 6, ICU, in-trial interview).*  
35  
36  
37  
38  
39  
40

41 Another nurse had the opposite experience:  
42  
43

44 *I worked 12-hour day shifts both Saturday and Sunday. It occurred to me*  
45 *that I can't remember the last time I wasn't exhausted after a shift. But this*  
46 *weekend, my legs were less tired than on a regular work weekend. I wasn't*  
47 *physically tired at all from working this weekend (Nurse 5, ICU, in-trial*  
48 *interview).*  
49  
50  
51  
52  
53  
54  
55

56 Some of the participants found it more difficult to work 12-hour day shifts than 12-hour  
57 night shifts:  
58  
59  
60

1  
2  
3 *The days are a bit longer than the nights. The difference between a 10-hour*  
4 *and 12-hour night shift is small, but the day... You need better shoes because*  
5 *your legs get tired (Nurse 3, ICU, in-trial interview).*  
6  
7  
8  
9

10  
11 The nurses in the non-ICU expressed uniform satisfaction with the opportunity to lie  
12  
13 down during the 1-hour break:  
14

15  
16 *I do not feel more tired than usual. I feel the night shifts are very good, with*  
17 *the 1-hour rest break. It is almost the worst [to work] the night before*  
18 *Saturday, because then we work a regular night shift without the mandatory*  
19 *break. I almost look forward to the next night when I work 12 hours and get*  
20 *to have a break for a whole hour (Nurse 13, non-ICU, in-trial interview).*  
21  
22  
23  
24  
25  
26  
27

### 28 **3.3.3. Patient outcomes**

29  
30 None of the respondents admitted to making any mistakes during their 12-hour shifts, but  
31 they were not always sure:  
32  
33

34  
35  
36 *I did not make any mistakes. But one thinks about it—after 11 hours, it could*  
37 *be easy to misread a graph, or something similar. Not that it has happened,*  
38 *but we are not as awake at the end of the shift as at the beginning (Nurse 2,*  
39 *non-ICU, in-trial interview).*  
40  
41  
42  
43  
44  
45

46 When asked about observed patient outcomes, some nurses said that they did not think  
47 patients noticed much difference. Some patients in the non-ICU had observed that some of  
48 the nurses were present for a long time, and had asked them about this. The nurses did not  
49 receive any negative reactions from the patients after explaining the trial, only positive  
50 responses. They also adjusted their rest break to their work tasks to minimise the  
51 consequences for the patients.  
52  
53  
54  
55  
56  
57  
58  
59  
60



1  
2  
3 *I take my rest break after I have finished distributing medication, pain*  
4 *relievers, and meals, so my patients don't often need to call for someone else*  
5 *during my break (Nurse 13, non-ICU, post-trial interview).*  
6  
7  
8  
9

#### 10 **3.3.4. Family situation and friends**

11  
12 Most respondents felt that the most important positive consequence of working 12-hour  
13 shifts was only having to work every fourth weekend, instead of every third. They felt this  
14 was important because of their family situations.  
15  
16  
17  
18

19  
20 *[Working] every fourth weekend instead of every third is very important to*  
21 *me, especially since my second child was born. It's okay to have time off*  
22 *during the weekdays, but this is not when my family has time off. So weekends*  
23 *off are very precious to me (Nurse 1, non-ICU, in-trial interview).*  
24  
25  
26  
27  
28  
29

30 Some nurses had asked their family explicitly what they thought about the 12-hour shifts:  
31

32  
33 *They are happy I'm home on more weekends. Whether I work a 12-hour or*  
34 *8-hour shift during the weekend does not matter to them. Maybe I sleep more*  
35 *during the regular work weekends, so the kids do not see me much on these*  
36 *weekends anyway (Nurse 11, non-ICU, in-trial interview).*  
37  
38  
39  
40  
41  
42

43 Individual family situations sometimes necessitated adjustments to the work schedule:  
44

45  
46 *I have my son every second weekend, and this is the only reason for me to*  
47 *work the 12-hour shifts every fourth instead of every third weekend (Nurse*  
48 *16, non-ICU, in-trial interview).*  
49  
50  
51  
52  
53

54 Some of the nurses without children also valued the weekend more than weekdays for  
55 many reasons:  
56  
57  
58  
59  
60

1  
2  
3 ...none of my friends outside of work do shift-work, so for me, the weekends  
4  
5 are sacred (Nurse 15, non-ICU, in-trial interview).  
6  
7

8  
9 Family needs could be demanding for nurses with young children. For example:

10  
11 *As a joke, I say that my job at the hospital is my second job, because my main*  
12  
13 *job is at home. I have many things to keep track on at home, and when I have*  
14  
15 *a work weekend, I still want to be with the kids. I feel bad about going to*  
16  
17 *work, so when I get up in the morning, I must organise everything [my kids*  
18  
19 *might need]. But when I work 12-hour shifts, I say to myself, “Okay this is*  
20  
21 *my work weekend”, and then I concentrate on that and think about the fact*  
22  
23 *that I have three weekends off afterwards when I can be with my children*  
24  
25 *(Nurse 7, non-ICU, in-trial interview).*  
26  
27  
28  
29  
30

31 All participants who were married noted that their husbands wanted them to work 12-  
32  
33 hour shifts every fourth weekend instead of 8-hour shifts every third weekend.  
34  
35

36 *My husband wants me to work the 12-hour shift weekends. He takes the kids*  
37  
38 *to visit their grandparents on my work weekends and I have a quiet house.*  
39  
40 *This is fine for them and for me (Nurse 13, non-ICU, in-trial interview).*  
41  
42  
43

44 A more experienced nurse with adult children also noted that her husband liked this  
45  
46 arrangement:  
47  
48

49 *My husband thinks this is fine, because we can go to our holiday cabin on*  
50  
51 *more weekends than before. And on my work weekend, he can go to the cabin*  
52  
53 *alone, because all I do that weekend is work (Nurse 8, ICU, in-trial*  
54  
55 *interview).*  
56  
57  
58

59 However, others felt they missed out at home when they worked a long shift on Saturday:  
60

1  
2  
3 *It was wonderful to get home at 8 pm on Saturday night and have a nice meal*  
4 *and relax with my boyfriend. This gave me a bit more of a weekend feeling.*  
5  
6 *Two or three hours of rest before going to bed was good. Now, I get home at*  
7  
8 *10.30 pm and feel I must rush to bed to get enough sleep before the next shift*  
9  
10 *(Nurse 2, non-ICU, in-trial interview).*  
11  
12  
13  
14

### 15 **3.3.5. Tasks at work**

16  
17 Many of the participants experienced greater flexibility during the 12-hour shifts than the  
18  
19 8-hour shifts.  
20  
21

22  
23 *The 12-hour night shifts have been terrific. I have a much better overview*  
24 *when I arrive at 8 pm and can start the evening round of medicines, start to*  
25 *get the antibiotics ready, organise the medicine for the next day, and so on.*  
26  
27 *And I finish my round earlier compared with when we start working at*  
28  
29 *9.30 or 10 pm (Nurse 10, non-ICU, in-trial interview).*  
30  
31  
32  
33  
34

35 The nurses also commented that they experienced fewer interruptions of work tasks  
36  
37 during the 12-hour shifts:  
38  
39

40  
41 *I noticed this at the time that would have been the regular shift change [had*  
42 *it been an 8-hour day], when we were in the middle of a procedure, on one*  
43 *of the days when I worked the 12-hour day shift. I was assisting a doctor with*  
44 *a lengthy procedure, and usually one gets a bit stressed at such times,*  
45 *because we have to finish the report and everything else before the next shift*  
46 *starts at 2.30 pm. And then I thought, "God, this is actually very good",*  
47 *because I could relax and concentrate on what I was doing, and I took my*  
48  
49 *time and calmly finished the procedure around 4 pm. Usually, I would have*  
50  
51 *to hand over to the next nurse during the procedure and give a short oral*  
52  
53  
54  
55  
56  
57  
58  
59  
60

1  
2  
3 *report. We lose continuity this way, because the doctors are there the entire*  
4 *day. So I think it's better for all [having 12-hour shifts]. I didn't have a*  
5 *ticking clock at the back of my mind all day (Nurse 1, ICU, in-trial interview).*  
6  
7  
8  
9

10  
11 This nurse also commented on the satisfying experience of completing jobs on her own,  
12  
13 rather than having to leave them to the next shift:  
14

15  
16 *And I feel that I get to do what I'm supposed to do on the days I work 12-*  
17 *hour shifts. Instead of telling the next nurse what I have planned to do, I do*  
18 *it myself. Because I can't be sure that the next nurse has the same priorities*  
19 *and will do what I planned (Nurse 1, ICU, in-trial interview).*  
20  
21  
22  
23  
24  
25

26 Being present in the unit for a longer time may make the job easier because the nurses can  
27  
28 prepare and get to know patients better. During the trial period, the participants always  
29  
30 worked on the Friday before. Some noted that this prepared them better for the long shifts on  
31  
32 Saturday and Sunday because they knew what to expect, having learned more about the  
33  
34 patients in the ward.  
35  
36

37  
38 Several participants also felt they could plan and structure a long shift better:  
39

40  
41 *The ward is usually busy, and I have had work weekends where I have been*  
42 *very tired and have been very happy to go home at 3 pm. However, I have*  
43 *not always been happy with my work, because too much was left for the next*  
44 *shift [to finish]. Now I can plan better and complete all my tasks (Nurse 9,*  
45 *non-ICU, in-trial interview).*  
46  
47  
48  
49  
50  
51

52  
53 Other nurses reported similar experiences:  
54  
55  
56  
57  
58  
59  
60

1  
2  
3 *If you've promised the parents the infant will have a bath, you don't have to*  
4 *stress and do it early in the day; you can plan to find a calmer period, to*  
5 *have more time available for the task (Nurse 9, ICU, in-trial interview).*  
6  
7  
8  
9

10  
11 Another nurse at the same unit had similar experiences working night shifts:  
12

13  
14 *I think I do the same as usual. However, I think I have more time to do my*  
15 *tasks. Nothing must be done right away because I'm going to be here until*  
16 *the next day (Nurse 4, ICU, in-trial interview)*  
17  
18  
19  
20

### 21 22 3.4. Decisions after the end of the trial period 23

24  
25 The manager at the ICU decided not to continue the 12-hour weekend shifts after the trial  
26 period, whereas the manager at the non-ICU decided to allow more nurses to try out this  
27 approach.  
28  
29

30  
31 For the nurses in the non-ICU, working fewer weekends and being able to provide a  
32 higher quality of care were the main reasons for continuing to work the 12-hour shifts. Some  
33 participants had not expected the 12-hour shifts to be successful in this very busy unit, but  
34 realised that they liked working longer shifts:  
35  
36  
37  
38  
39  
40

41  
42 *I liked working 12-hour shifts very much. I was sceptical the first time I heard*  
43 *about it, but I wanted to try. I think they are suitable for me [because] I have*  
44 *good capacity to work, and think that when I'm at work, I like to work hard.*  
45 *I can tolerate this [way of working], but I have not been sick and I can handle*  
46 *the pressure quite well (Nurse 7, non-ICU, post-trial interview).*  
47  
48  
49  
50  
51  
52

53  
54 The participants from the ICU reported mixed experiences at the end of the trial period.  
55 Some were unhappy about the decision not to implement 12-hour shifts as part of the regular  
56 schedule once the trial period was finished. They argued that this decision was only made  
57  
58  
59  
60

1  
2  
3 because the schedule planners found it difficult to implement 12-hour shift schedules. When  
4  
5 one participant was asked whether the scheduling process could be made easier if the unit  
6  
7 were organised differently, she replied:

8  
9  
10  
11 *Yes, without doubt. If we were divided into two groups instead of three it*  
12  
13 *would be much easier to make up the shift plans. We would have more people*  
14  
15 *to choose from and that would give more flexibility (Nurse 7, ICU, post-trial*  
16  
17 *interview).*

18  
19  
20  
21 Another nurse in the ICU also wanted the 12-hour shifts to be continued, and shared the  
22  
23 following experience after the trial ended.

24  
25  
26 *Now I see a lot of work weekends on my shift plan. I experienced a significant*  
27  
28 *difference between working every fourth and every third weekend. Now,*  
29  
30 *there are more conflicts with other things that happen outside work. I did not*  
31  
32 *experience this to the same extent when I worked every fourth weekend*  
33  
34 *(Nurse 1, ICU, post-trial interview).*

35  
36  
37  
38 Others were indifferent about the decision not to continue the 12-hour shifts:

39  
40  
41 *I haven't really engaged in this discussion; I just noticed that they didn't*  
42  
43 *want to continue. My first thought was that it [the decision] sucked, but then*  
44  
45 *I decided to focus my energy on doing my job instead (Nurse 5, ICU, post-*  
46  
47 *trial interview).*

48  
49  
50  
51 A small group of nurses had decided not to continue with the 12-hour shifts before  
52  
53 management decided not to continue. Not all nurses shared a clear preference for avoiding  
54  
55 working on weekends:  
56  
57  
58  
59  
60

1  
2  
3 *Well, I don't have small children. For some, the 12-hour shifts are better—*  
4 *for instance, those only working night shifts and those who have to commute*  
5 *longer distances (Nurse 4, ICU, post-trial interview).*  
6  
7

8  
9  
10  
11 *Well, it is good to have an extra weekend off, but I must work much more*  
12 *during the weekdays Monday to Friday. That's what everybody else does.*  
13 *But I'm happy working shifts with more time off on weekdays (Nurse 2, ICU,*  
14 *post-trial interview).*  
15  
16  
17  
18  
19

20  
21 Some ICU nurses who had been sceptical before the trial had positive experiences and  
22 wanted to continue. Others who had been positive before the trial did not want to continue  
23 working 12-hour shifts after the trial. This indicates that it may be difficult for nurses to  
24 anticipate their own preferences for shift lengths accurately, before trying them in practice.  
25  
26  
27  
28  
29

#### 30 31 **4. Discussion** 32

33  
34  
35 This qualitative longitudinal study followed nurses for 18 months before, during, and  
36 after they trialled working 12-hour shifts on weekends for 1 year. Their participation in the  
37 12-hour shift work was completely voluntary, and only those motivated to work the 12-hour  
38 shifts participated. The aim of the study was to understand the nurses' individual experiences.  
39  
40  
41  
42  
43  
44  
45  
46  
47  
48  
49  
50  
51  
52  
53  
54  
55  
56  
57  
58  
59  
60  
61  
62  
63  
64  
65  
66  
67  
68  
69  
70  
71  
72  
73  
74  
75  
76  
77  
78  
79  
80  
81  
82  
83  
84  
85  
86  
87  
88  
89  
90  
91  
92  
93  
94  
95  
96  
97  
98  
99  
100  
101  
102  
103  
104  
105  
106  
107  
108  
109  
110  
111  
112  
113  
114  
115  
116  
117  
118  
119  
120  
121  
122  
123  
124  
125  
126  
127  
128  
129  
130  
131  
132  
133  
134  
135  
136  
137  
138  
139  
140  
141  
142  
143  
144  
145  
146  
147  
148  
149  
150  
151  
152  
153  
154  
155  
156  
157  
158  
159  
160  
161  
162  
163  
164  
165  
166  
167  
168  
169  
170  
171  
172  
173  
174  
175  
176  
177  
178  
179  
180  
181  
182  
183  
184  
185  
186  
187  
188  
189  
190  
191  
192  
193  
194  
195  
196  
197  
198  
199  
200  
201  
202  
203  
204  
205  
206  
207  
208  
209  
210  
211  
212  
213  
214  
215  
216  
217  
218  
219  
220  
221  
222  
223  
224  
225  
226  
227  
228  
229  
230  
231  
232  
233  
234  
235  
236  
237  
238  
239  
240  
241  
242  
243  
244  
245  
246  
247  
248  
249  
250  
251  
252  
253  
254  
255  
256  
257  
258  
259  
260  
261  
262  
263  
264  
265  
266  
267  
268  
269  
270  
271  
272  
273  
274  
275  
276  
277  
278  
279  
280  
281  
282  
283  
284  
285  
286  
287  
288  
289  
290  
291  
292  
293  
294  
295  
296  
297  
298  
299  
300  
301  
302  
303  
304  
305  
306  
307  
308  
309  
310  
311  
312  
313  
314  
315  
316  
317  
318  
319  
320  
321  
322  
323  
324  
325  
326  
327  
328  
329  
330  
331  
332  
333  
334  
335  
336  
337  
338  
339  
340  
341  
342  
343  
344  
345  
346  
347  
348  
349  
350  
351  
352  
353  
354  
355  
356  
357  
358  
359  
360  
361  
362  
363  
364  
365  
366  
367  
368  
369  
370  
371  
372  
373  
374  
375  
376  
377  
378  
379  
380  
381  
382  
383  
384  
385  
386  
387  
388  
389  
390  
391  
392  
393  
394  
395  
396  
397  
398  
399  
400  
401  
402  
403  
404  
405  
406  
407  
408  
409  
410  
411  
412  
413  
414  
415  
416  
417  
418  
419  
420  
421  
422  
423  
424  
425  
426  
427  
428  
429  
430  
431  
432  
433  
434  
435  
436  
437  
438  
439  
440  
441  
442  
443  
444  
445  
446  
447  
448  
449  
450  
451  
452  
453  
454  
455  
456  
457  
458  
459  
460  
461  
462  
463  
464  
465  
466  
467  
468  
469  
470  
471  
472  
473  
474  
475  
476  
477  
478  
479  
480  
481  
482  
483  
484  
485  
486  
487  
488  
489  
490  
491  
492  
493  
494  
495  
496  
497  
498  
499  
500  
501  
502  
503  
504  
505  
506  
507  
508  
509  
510  
511  
512  
513  
514  
515  
516  
517  
518  
519  
520  
521  
522  
523  
524  
525  
526  
527  
528  
529  
530  
531  
532  
533  
534  
535  
536  
537  
538  
539  
540  
541  
542  
543  
544  
545  
546  
547  
548  
549  
550  
551  
552  
553  
554  
555  
556  
557  
558  
559  
560  
561  
562  
563  
564  
565  
566  
567  
568  
569  
570  
571  
572  
573  
574  
575  
576  
577  
578  
579  
580  
581  
582  
583  
584  
585  
586  
587  
588  
589  
590  
591  
592  
593  
594  
595  
596  
597  
598  
599  
600  
601  
602  
603  
604  
605  
606  
607  
608  
609  
610  
611  
612  
613  
614  
615  
616  
617  
618  
619  
620  
621  
622  
623  
624  
625  
626  
627  
628  
629  
630  
631  
632  
633  
634  
635  
636  
637  
638  
639  
640  
641  
642  
643  
644  
645  
646  
647  
648  
649  
650  
651  
652  
653  
654  
655  
656  
657  
658  
659  
660  
661  
662  
663  
664  
665  
666  
667  
668  
669  
670  
671  
672  
673  
674  
675  
676  
677  
678  
679  
680  
681  
682  
683  
684  
685  
686  
687  
688  
689  
690  
691  
692  
693  
694  
695  
696  
697  
698  
699  
700  
701  
702  
703  
704  
705  
706  
707  
708  
709  
710  
711  
712  
713  
714  
715  
716  
717  
718  
719  
720  
721  
722  
723  
724  
725  
726  
727  
728  
729  
730  
731  
732  
733  
734  
735  
736  
737  
738  
739  
740  
741  
742  
743  
744  
745  
746  
747  
748  
749  
750  
751  
752  
753  
754  
755  
756  
757  
758  
759  
760  
761  
762  
763  
764  
765  
766  
767  
768  
769  
770  
771  
772  
773  
774  
775  
776  
777  
778  
779  
780  
781  
782  
783  
784  
785  
786  
787  
788  
789  
790  
791  
792  
793  
794  
795  
796  
797  
798  
799  
800  
801  
802  
803  
804  
805  
806  
807  
808  
809  
810  
811  
812  
813  
814  
815  
816  
817  
818  
819  
820  
821  
822  
823  
824  
825  
826  
827  
828  
829  
830  
831  
832  
833  
834  
835  
836  
837  
838  
839  
840  
841  
842  
843  
844  
845  
846  
847  
848  
849  
850  
851  
852  
853  
854  
855  
856  
857  
858  
859  
860  
861  
862  
863  
864  
865  
866  
867  
868  
869  
870  
871  
872  
873  
874  
875  
876  
877  
878  
879  
880  
881  
882  
883  
884  
885  
886  
887  
888  
889  
890  
891  
892  
893  
894  
895  
896  
897  
898  
899  
900  
901  
902  
903  
904  
905  
906  
907  
908  
909  
910  
911  
912  
913  
914  
915  
916  
917  
918  
919  
920  
921  
922  
923  
924  
925  
926  
927  
928  
929  
930  
931  
932  
933  
934  
935  
936  
937  
938  
939  
940  
941  
942  
943  
944  
945  
946  
947  
948  
949  
950  
951  
952  
953  
954  
955  
956  
957  
958  
959  
960  
961  
962  
963  
964  
965  
966  
967  
968  
969  
970  
971  
972  
973  
974  
975  
976  
977  
978  
979  
980  
981  
982  
983  
984  
985  
986  
987  
988  
989  
990  
991  
992  
993  
994  
995  
996  
997  
998  
999  
1000

1  
2  
3 when the trial period started, and all nurses were divided into three groups with different  
4 tasks. During the interviews, it appeared that not all employees were satisfied with the new  
5 organisation of the unit. Their main argument against the reorganisation was that they had  
6 each ended up with a narrower spectrum of work tasks than desired. Such changes may have  
7 negative impact especially on job satisfaction.  
8  
9  
10  
11  
12  
13  
14

#### 15 16 *4.1. Job satisfaction*

17  
18  
19 Job satisfaction was high overall among the participants. In the non-ICU, the nurses were  
20 generally happy that the use of 12-hour shifts would continue, and more nurses wanted to try  
21 the extended shifts. In the ICU, the nurses had mixed reactions to the managers' decision not  
22 to continue the 12-hour shifts. Some thought this was a poor decision; others were indifferent  
23 or supportive. Overall job satisfaction at the units does not appear to have been affected by  
24 the 12-hour shifts. However, different preferences may affect the nurses' ongoing job  
25 satisfaction at the individual level. This is consistent with the findings of Kundi et al.  
26 (1995),[16] who found similar levels of job satisfaction between 8-hour shift workers and 12-  
27 hour shift workers. In our study, only volunteers were included, and no one was forced to  
28 work the extended shift against their will. This study therefore cannot rule out the possibility  
29 of negative consequences on job satisfaction if nurses are forced to work longer shifts, rather  
30 than volunteering.  
31  
32  
33  
34  
35  
36  
37  
38  
39  
40  
41  
42  
43  
44  
45  
46  
47

#### 48 *4.2. Health effects*

49  
50  
51 Because participation was voluntary, and the same nurses were followed for 18 months,  
52 this study was able to probe factors behind the stress and burnout reported in the literature.[2,  
53 9, 8] Because the 12-hour shift was implemented only on weekends, we expected to see less  
54 significant effects on health and wellbeing among the participating nurses compared with  
55 those working 12-hour shifts throughout the week in other studies. Most of the participants in  
56  
57  
58  
59  
60



1  
2  
3 our study experienced a greater physical and mental workload during 12-hour shifts  
4  
5 compared with 8-hour shifts. This was mainly because of the longer time spent walking and  
6  
7 standing and being exposed to the dry air in the units. A recovery period was needed after a  
8  
9 12-hour shift weekend. The nurses commented that pre-existing health problems might be  
10  
11 worsened by working long shifts. Some had health concerns before they started the trial, but  
12  
13 still felt that there were advantages of working every fourth instead of every third weekend  
14  
15 and wished to continue. It is possible that these nurses overlooked or underreported negative  
16  
17 health consequences of the longer shifts. We suggest that negative health effects of 12-hours  
18  
19 shifts will be significant if employees with health problems are forced to work longer shifts  
20  
21 than they can tolerate given their health status.  
22  
23  
24  
25  
26

#### 27 *4.3. Effects on sleep*

28  
29

30 The literature shows that nurses accrue considerable sleep debt while working successive  
31  
32 12-hour shifts, with accompanying fatigue and sleepiness, and that some nurses are more  
33  
34 severely affected by sleep loss than others, as measured by attention lapses.[10] In this study,  
35  
36 the 12-hour shifts were worked only on weekends and were voluntary, and the effect on sleep  
37  
38 was expected to be slight. We find that those who reported sleeping problems in the pre-trial  
39  
40 interviews had the same sleeping problems when they were working 12-hour shifts. None of  
41  
42 the participants reported having sleep problems from starting to work 12-hour shifts.  
43  
44 However, we cannot rule out the possibility that the nurses who self-selected to participate  
45  
46 were less susceptible to sleep problems than those who opted out. However, of the 24  
47  
48 participants, many reported sleeping problems in the pre-trial interviews, so the opposite may  
49  
50 also be the case. We suggest that the observed variation in individual sleep quality gives an  
51  
52 important argument for hospital owners to offer the nurses and other employee different  
53  
54 choices of working hour agreements.  
55  
56  
57  
58  
59  
60

#### 4.4. Patient safety

There is some evidence that longer work hours for hospital staff can increase the risk of errors and hospital-associated infection among patients.[17, 18] However, a systematic literature review concluded that more evidence is needed to conclude whether there is a causal relationship between long work hours and adverse patient outcomes.[4] In this study, all participants acknowledged that the risk of mistakes was higher at the end than at the beginning of a shift. However, none of the nurses reported making mistakes during the trial period.

One finding that is rarely reported in the literature is a positive effect on patients and the quality of care from longer nurse work hours—yet this was reported by our participants. Most felt they had more time to complete their tasks, and the opportunity to follow their patients for longer during each shift.

We did not interview the doctors, and we do not know whether this trial had any effects on them. However, it is plausible the doctors benefited from having fewer disruptions during procedures for hand-overs between the nurses working different shifts, and from having fewer nurses to communicate with during the day.

The 12-hour night shifts were perceived to work well in this trial, especially in the non-ICU, where nurses had their own room with a bed for resting. A recent study reported that 12-hour night shift workers exhibit more performance variability and subjective sleepiness than day workers, and suggests that workplace napping may be considered.[19] We find that the 1-hour rest break available to the nurses working 12-hour night shift in our study, was very appreciated by the nurses. The 1-hour break was used in various ways by the nurses, and most satisfaction was expressed by those who had access to a designated room with a bed where they could lay down in their 1-hour rest break during the night shift. This arrangement

1  
2  
3 may have contributed to the lower level of sleepiness and performance variability self-  
4 reported by nurses in our study.  
5  
6

7  
8 Turning to the long duration of night shifts in this study, the participating nurses had  
9 positive experiences with the 12-hour night shifts overall. Several factors may account for  
10 this. Notably, all participants in the medical unit felt that having a bed in a designated staff  
11 room for rest breaks during the long night shifts was an advantage. This may be an effective  
12 method for reducing the increased risk of accidents in long shifts reported in the literature.[6]  
13  
14  
15  
16  
17  
18

#### 19 20 21 4.5. *Employee safety* 22

23  
24 Shift work generally, and night shifts and long shifts in particular, are frequently  
25 associated with adverse effects on employees. However, this study found mixed views on the  
26 employee safety implications of longer (12-hour) shifts, including for the night shifts.  
27  
28  
29

30  
31 On one hand, the managers of both units argued that “pure” night shift workers became  
32 an isolated group, whom the managers never met and who did not receive the professional  
33 updates received by nurses working days and evenings. They therefore wanted the night  
34 shifts to be spread among more nurses, and had reduced the size of the designated pure night  
35 team, i.e., the nurses working night shifts exclusively.  
36  
37  
38  
39  
40

41  
42 On the other hand, this change was not preferred by most of the nurses—regardless of  
43 whether they wanted to work primarily nights or did not handle night work well. The  
44 literature suggests a possible explanation. Wagstaff and Lie (2011) concluded that pure night  
45 work may provide some protection against the negative health effects often reported from  
46 intermittent night shift work, by allowing resynchronisation. Therefore, there may be good  
47 arguments for reintroducing pure night shift teams. Moreover, if night shifts are 12 hours  
48 long, the alienation mentioned by managers may be reduced, because the night shift nurses  
49 arrive earlier in the evenings to start their shift and therefore participate in some of the same  
50  
51  
52  
53  
54  
55  
56  
57  
58  
59  
60

1  
2  
3 activities as nurses working the evening shift. On the other hand, some nurses did not want to  
4  
5 change from a two-shift system to a three-shift system. This may be explained in part by a  
6  
7 recent study of combined in-field and laboratory experiments that concluded that chronic  
8  
9 shift work causes night shift intolerance.[20]  
10  
11

### 12 13 *An overall evaluation* 14

15  
16 We agree with Ferguson and Dawson (2012),[21] who concluded that there is no simple  
17  
18 “yes or no” answer to the choice between 12-hour versus 8-hour shifts. They argued that the  
19  
20 answer depends on the context, including the work tasks, workforce, and workplace.  
21  
22 However, we wish to add another dimension: individual preferences.  
23  
24

25  
26 Individual nurses’ preferences are heterogeneous even within the same unit. It is not easy  
27  
28 to obtain a clear picture of the diversity of preferences using quantitative methods. Moreover,  
29  
30 a given individual’s preference will change over time as her or his family and health situation  
31  
32 evolves, and depending on the situation at work. Therefore, no universal decision about shift  
33  
34 length preferences is possible; rather, continuous dynamic assessment of the most suitable  
35  
36 shift length and rotation scheme for each employee is needed, if the aim is to reduce the  
37  
38 adverse outcomes of shift work.  
39  
40

41  
42 The scoping review by Harris et al. (2015)[22] suggests that there may always be  
43  
44 insufficient evidence to justify either the widespread implementation or the withdrawal of 12-  
45  
46 hour shifts for nurses. They concluded that the real benefits, and whether there are real and  
47  
48 unacceptable risks to patients and staff, are unknown. They also noted that more research is  
49  
50 needed to understand the long-term effects, as opposed to more easily measured short-term  
51  
52 effects.  
53  
54

55  
56 We suggest that the mixed results in previous studies reflect the fact that there is simply  
57  
58 no universally correct answer to this question, because of the differences in context but also  
59  
60

1  
2  
3 the heterogeneity and dynamic nature of individual preferences and tolerance. We argue that  
4  
5 the observed diversity of expectations and experiences, and the strength of different nurses'  
6  
7 contrasting preferences about long shifts, indicate that 12-hour shifts should be completely  
8  
9 voluntary, rather than being either mandated or banned as a universal policy.  
10  
11  
12

### 13 14 **5. Strengths and limitations**

15  
16  
17 A key strength of this study is its longitudinal design. The nurses trialled 12-hour shifts  
18  
19 for 1 year, and their perspectives were obtained over an 18-month period that captured the  
20  
21 nurses' views before, during, and after the intervention. Another strength is the richness and  
22  
23 authenticity of individual experiences that can be revealed by a qualitative methodology  
24  
25 based on a relatively unstructured interview format.  
26  
27

28  
29 A key limitation is the small sample size of 24 nurses. However, given that our qualitative  
30  
31 research design based on interviews was unsuitable for very large sample sizes, a more  
32  
33 important limitation is that we excluded nurses who did not wish to trial the 12-hour shifts. It  
34  
35 is possible this study underestimates the risk of adverse outcomes from 12-hour shifts, as  
36  
37 nurses who knew they would be susceptible to such outcomes likely chose not to participate.  
38  
39 This aspect of the study design was determined by ethical considerations: as it would be  
40  
41 highly unethical to force someone to work 12-hour shifts against their will, a requirement for  
42  
43 study approval was that the 12-hour shifts would be voluntary. Additionally, we suspect that  
44  
45 negative health consequences of working 12-hour shifts were underreported by the  
46  
47 participants, as many wanted the trial to succeed so they could work only every fourth  
48  
49 weekend instead of every third weekend.  
50  
51  
52

53  
54 Another limitation is that only female nurses participated in the study.  
55  
56  
57  
58  
59  
60

## 6. Conclusion

This study revealed the diversity of nurses' preferences for working 12-hour shifts. While the experience of working 12-hour shifts was positive for most of the participating nurses in our study, it was not universally preferred. We suggest that individual preference for working 12-hour shifts is a function of own health situation, family situation, work load tolerance, degree of sleep problems, personality and other factors.

Based on these findings, we recommend that working 12-hour shifts in public hospitals should be voluntary. Pushing nurses into working long shifts against their will could negatively affect their health, job satisfaction, and general life quality, and drive them away from the profession.

### a. Contributorship statement

HF and SOO wrote the project proposal and obtained funding. SOO, MST and SLK conducted the interviews. MST, SLK and SOO coded all the interviews based on a code-list developed by the team of all authors. SOO drafted the manuscript and the other authors contributed significantly to the final version.

### b. Competing interests

The authors declare that they have no conflict of interest.

### c. Funding

This project was funded mainly by the Research Council of Norway. The main hospital employer organisation (SPEKTER), the nurses' union (NSF), and the nursing assistants' union (Fagforbundet) financed the same yearly amount covering in total one-fifth of the

1  
2  
3 project's total cost. None of the funding bodies read the manuscript or had any influence on  
4  
5 the results.  
6  
7  
8  
9

#### 10 d. Data sharing statement

11 All interviews were recorded and converted to text files. The text files are in Norwegian and  
12  
13 can be made available upon request. The interview guide can also be made available upon  
14  
15 request. Written informed consent was obtained from all participants.  
16  
17  
18  
19  
20  
21  
22

## 23 References

- 24  
25  
26 [1] Admi, H., Tzischinsky, O., Epstein, R., Herer, P., Lavie, P. 2008. Shift work in nursing: is it really  
27  
28 a risk factor for nurses' health and patients' safety? *Nurs. Econ.* 26, 250–257.  
29  
30 [2] Dall'Ora, C., Griffiths, P., Ball, J., Simon, M., H Aiken, L.H. 2015. Association of 12-h shifts and  
31  
32 nurses' job satisfaction, burnout and intention to leave: findings from a cross-sectional study of  
33  
34 12 European countries. *BMJ Open* 5, e008331. doi: 10.1136/bmjopen-2015-008331.  
35  
36 [3] Estabrooks, C.A., Cummings, G.G., Olivo, S.A., Squires, J.E., Giblin, C., Simpson, N. 2009.  
37  
38 Effects of shift length on quality of patient care and health provider outcomes: systematic review.  
39  
40 *Qual. Saf. Health Care* 18, 181–188.  
41  
42 [4] Bae, S.-H., Fabry, D. 2014. Assessing the relationships between nurse work hours/overtime and  
43  
44 nurse and patient outcomes: systematic literature review. *Nurs. Outlook* 62, 138–156.  
45  
46 [5] Clendon, J. and V. Gibbons (2015). 12h shifts and rates of error among nurses: A systematic  
47  
48 review. *International Journal of Nursing Studies* 52(7): 1231-1242.  
49  
50 [6] Wagstaff, A.S., Lie, J.-A.S. 2011. Shift and night work and long working hours-a systematic  
51  
52 review of safety implications. *Scand. J. Work Environ. Health* 37, 173–185.  
53  
54 [7] Banakhar, M. 2017. The impact of 12-hour shifts on nurses' health, wellbeing, and job  
55  
56 satisfaction: A systematic review. *J. Nurs. Educ. Pract.* 7, 69.  
57  
58  
59  
60

- 1  
2  
3 [8] Iskera-golec, I., Folkard, S., Marek, T., Noworol, C. 1996. Health, well-being and burnout of ICU  
4 nurses on 12-and 8-h shifts. *Work Stress* 10, 251–256.
- 5  
6  
7 [9] Chen, J., Davis, K.G., Daraiseh, N.M., Pan, W., Davis, L.S. 2014. Fatigue and recovery in 12-hour  
8 dayshift hospital nurses. *J. Nurs. Manag.* 22, 593–603.
- 9  
10  
11 [10] Geiger-Brown, J., Rogers, V.E., Trinkoff, A.M., Kane, R.L., Bausell, R.B., Scharf, S.M. 2012.  
12 Sleep, sleepiness, fatigue, and performance of 12-hour-shift nurses. *Chronobiol. Int.* 29, 211–219.
- 13  
14  
15 [11] Stone, P.W., Du, Y., Cowell, R., Amsterdam, N., Helfrich, T.A., Linn, R.W., Gladstein, A.,  
16 Walsh, M., Mojica, L.A. 2006. Comparison of nurse, system and quality patient care outcomes in  
17 8-hour and 12-hour shifts. *Med. Care* 44, 1099–1106.
- 18  
19  
20 [12] Battle, C. and P. Temblett (2018). "12-Hour nursing shifts in critical care: A service evaluation."  
21 *Journal of the Intensive Care Society*: 1751143717748094.
- 22  
23  
24 [13] Gupta, N., Diallo, K., Zurn P., Dal Poz, M.R. 2003. Assessing human resources for health: what  
25 can be learned from labour force surveys? *Hum. Resour. Health* 1, 5.
- 26  
27  
28 [14] OECD. 2014. *OECD Reviews of Health Care Quality: Norway 2014*. OECD Publishing, Paris.
- 29  
30  
31 [15] Ose, S.O. 2016. Using Excel and Word to structure qualitative data. *J. Appl. Soc. Sci.* 10, 147–  
32 162.
- 33  
34  
35 [16] Kundi, M., Koller, M., Stefan, H., Lehner, L., Kaindlstorfer, S., Rottenbacher, S. 1995. Attitudes  
36 of nurses towards 8-h and 12-h shift systems. *Work Stress* 9, 134–139.
- 37  
38  
39 [17] Scott, L.D., Rogers, A.E., Hwang, W.-T., Zhang, Y. 2006. Effects of critical care nurses' work  
40 hours on vigilance and patients' safety. *Am. J. Crit. Care* 15, 30–37.
- 41  
42  
43 [18] Virtanen, M., Kurvinen, T., Terho, K., Oksanen, T., Peltonen, R., Vahtera, J., Routamaa, M.,  
44 Elovainio, M., M. Kivimaki, M. 2009. Work hours, work stress, and collaboration among ward  
45 staff in relation to risk of hospital-associated infection among patients. *Med. Care* 47, 310–318.
- 46  
47  
48 [19] Wilson, M., Permito, R., English, A., Albritton, S., Coogle, C., Van Dongen, H.P.A. 2017.  
49 Performance and sleepiness in nurses working 12-h day shifts or night shifts in a community  
50 hospital. *Accid. Anal. Prev.*
- 51  
52  
53  
54  
55  
56  
57  
58  
59  
60



1  
2  
3 [20] Li, P., Morris, C.J., Patxot, M., Yugay, T., Mistretta, J., Purvis, T.E., Scheer, F.A.J.L., Hu, K.  
4

5 2017. Reduced tolerance to night shift in chronic shift workers: insight from fractal regulation.  
6

7 Sleep 40, 1 July 2017. doi: 10.1093/sleep/zsx092.  
8

9 [21] Ferguson, S.A., Dawson, D. 2012. 12-h or 8-h shifts? It depends. Sleep Med. Rev. 16, 519–528.  
10

11 [22] Harris, R., Sims, S., Parr, J., Davies, N. 2015. Impact of 12-hour shift patterns in nursing: a  
12

13 scoping review. Int. J. Nurs. Stud. 52, 605–634.  
14  
15  
16  
17  
18  
19  
20  
21  
22  
23  
24  
25  
26  
27  
28  
29  
30  
31  
32  
33  
34  
35  
36  
37  
38  
39  
40  
41  
42  
43  
44  
45  
46  
47  
48  
49  
50  
51  
52  
53  
54  
55  
56  
57  
58  
59  
60

For peer review only

## Standards for Reporting Qualitative Research (SRQR)\*

<http://www.equator-network.org/reporting-guidelines/srqr/>

Page/line no(s).

### Title and abstract

|                                                                                                                                                                                                                                                              |                |
|--------------------------------------------------------------------------------------------------------------------------------------------------------------------------------------------------------------------------------------------------------------|----------------|
| <p><b>Title</b> - Concise description of the nature and topic of the study Identifying the study as qualitative or indicating the approach (e.g., ethnography, grounded theory) or data collection methods (e.g., interview, focus group) is recommended</p> | 1/ 1-3         |
| <p><b>Abstract</b> - Summary of key elements of the study using the abstract format of the intended publication; typically includes background, purpose, methods, results, and conclusions</p>                                                               | 2/1-25 & 3/1-2 |

### Introduction

|                                                                                                                                                                     |        |
|---------------------------------------------------------------------------------------------------------------------------------------------------------------------|--------|
| <p><b>Problem formulation</b> - Description and significance of the problem/phenomenon studied; review of relevant theory and empirical work; problem statement</p> | 7/8-15 |
| <p><b>Purpose or research question</b> - Purpose of the study and specific objectives or questions</p>                                                              | 7/16   |

### Methods

|                                                                                                                                                                                                                                                                                                                                                                                                             |                 |
|-------------------------------------------------------------------------------------------------------------------------------------------------------------------------------------------------------------------------------------------------------------------------------------------------------------------------------------------------------------------------------------------------------------|-----------------|
| <p><b>Qualitative approach and research paradigm</b> - Qualitative approach (e.g., ethnography, grounded theory, case study, phenomenology, narrative research) and guiding theory if appropriate; identifying the research paradigm (e.g., postpositivist, constructivist/ interpretivist) is also recommended; rationale**</p>                                                                            | 11/2-20         |
| <p><b>Researcher characteristics and reflexivity</b> - Researchers' characteristics that may influence the research, including personal attributes, qualifications/experience, relationship with participants, assumptions, and/or presuppositions; potential or actual interaction between researchers' characteristics and the research questions, approach, methods, results, and/or transferability</p> | 11/8-20         |
| <p><b>Context</b> - Setting/site and salient contextual factors; rationale**</p>                                                                                                                                                                                                                                                                                                                            | 8/2-22 & 9/2-11 |
| <p><b>Sampling strategy</b> - How and why research participants, documents, or events were selected; criteria for deciding when no further sampling was necessary (e.g., sampling saturation); rationale**</p>                                                                                                                                                                                              | 9/13-23         |
| <p><b>Ethical issues pertaining to human subjects</b> - Documentation of approval by an appropriate ethics review board and participant consent, or explanation for lack thereof; other confidentiality and data security issues</p>                                                                                                                                                                        | 12/1-2          |
| <p><b>Data collection methods</b> - Types of data collected; details of data collection procedures including (as appropriate) start and stop dates of data collection and analysis, iterative process, triangulation of sources/methods, and modification of procedures in response to evolving study findings; rationale**</p>                                                                             | 10/16-22        |

|                       |                                                                                                                                                                                                                                                       |          |
|-----------------------|-------------------------------------------------------------------------------------------------------------------------------------------------------------------------------------------------------------------------------------------------------|----------|
| 1<br>2<br>3<br>4<br>5 | <b>Data collection instruments and technologies</b> - Description of instruments (e.g., interview guides, questionnaires) and devices (e.g., audio recorders) used for data collection; if/how the instrument(s) changed over the course of the study | 10/16-17 |
| 6<br>7<br>8           | <b>Units of study</b> - Number and relevant characteristics of participants, documents, or events included in the study; level of participation (could be reported in results)                                                                        | 10/16-22 |
| 9<br>10<br>11<br>12   | <b>Data processing</b> - Methods for processing data prior to and during analysis, including transcription, data entry, data management and security, verification of data integrity, data coding, and anonymization/de-identification of excerpts    | 11/2-20  |
| 13<br>14<br>15<br>16  | <b>Data analysis</b> - Process by which inferences, themes, etc., were identified and developed, including the researchers involved in data analysis; usually references a specific paradigm or approach; rationale**                                 | 11/2-20  |
| 17<br>18<br>19<br>20  | <b>Techniques to enhance trustworthiness</b> - Techniques to enhance trustworthiness and credibility of data analysis (e.g., member checking, audit trail, triangulation); rationale**                                                                | 11/2-20  |

### Results/findings

|                            |                                                                                                                                                                                                   |                                               |
|----------------------------|---------------------------------------------------------------------------------------------------------------------------------------------------------------------------------------------------|-----------------------------------------------|
| 23<br>24<br>25<br>26       | <b>Synthesis and interpretation</b> - Main findings (e.g., interpretations, inferences, and themes); might include development of a theory or model, or integration with prior research or theory | Not relevant in this study                    |
| 27<br>28<br>29<br>30<br>31 | <b>Links to empirical data</b> - Evidence (e.g., quotes, field notes, text excerpts, photographs) to substantiate analytic findings                                                               | Quotes used extensively in the result chapter |

### Discussion

|                                        |                                                                                                                                                                                                                                                                                                                                                                                                             |          |
|----------------------------------------|-------------------------------------------------------------------------------------------------------------------------------------------------------------------------------------------------------------------------------------------------------------------------------------------------------------------------------------------------------------------------------------------------------------|----------|
| 34<br>35<br>36<br>37<br>38<br>39<br>40 | <b>Integration with prior work, implications, transferability, and contribution(s) to the field</b> - Short summary of main findings; explanation of how findings and conclusions connect to, support, elaborate on, or challenge conclusions of earlier scholarship; discussion of scope of application/generalizability; identification of unique contribution(s) to scholarship in a discipline or field | 34/22-24 |
| 41                                     | <b>Limitations</b> - Trustworthiness and limitations of findings                                                                                                                                                                                                                                                                                                                                            | 35/3-13  |

### Other

|                |                                                                                                                                               |         |
|----------------|-----------------------------------------------------------------------------------------------------------------------------------------------|---------|
| 44<br>45<br>46 | <b>Conflicts of interest</b> - Potential sources of influence or perceived influence on study conduct and conclusions; how these were managed | 36/5-6  |
| 47<br>48       | <b>Funding</b> - Sources of funding and other support; role of funders in data collection, interpretation, and reporting                      | 36/8-13 |

\*The authors created the SRQR by searching the literature to identify guidelines, reporting standards, and critical appraisal criteria for qualitative research; reviewing the reference lists of retrieved sources; and contacting experts to gain feedback. The SRQR aims to improve the transparency of all aspects of qualitative research by providing clear standards for reporting qualitative research.

1  
2  
3  
4  
5  
6  
7  
8  
9  
10  
11  
12  
13  
14  
15  
16  
17  
18  
19  
20  
21  
22  
23  
24  
25  
26  
27  
28  
29  
30  
31  
32  
33  
34  
35  
36  
37  
38  
39  
40  
41  
42  
43  
44  
45  
46  
47  
48  
49  
50  
51  
52  
53  
54  
55  
56  
57  
58  
59  
60

\*\*The rationale should briefly discuss the justification for choosing that theory, approach, method, or technique rather than other options available, the assumptions and limitations implicit in those choices, and how those choices influence study conclusions and transferability. As appropriate, the rationale for several items might be discussed together.

**Reference:**

O'Brien BC, Harris IB, Beckman TJ, Reed DA, Cook DA. **Standards for reporting qualitative research: a synthesis of recommendations.** *Academic Medicine*, Vol. 89, No. 9 / Sept 2014  
DOI: 10.1097/ACM.0000000000000388

For peer review only
